# Supplementary material for: Towards a mechanistic description of autoxidation chemistry: from precursors to atmospheric implications
Source: Copernicus journal article supplement (doi:10.5194/egusphere-2023-1415), 2023-07-26
Supplement: Supplementary file 1 [file egusphere-2023-1415-supplement.pdf]

## Supplementary text

### Interpreting ion count data from CIMS measurements

In this study, we compared the output of the model to the benzene oxidation product distribution measured with nitrate ion-based chemical ionization mass spectrometer ( $\text{NO}_3^-$  - CIMS, Jokinen et al., 2012). The product spectra for low- $\text{NO}_x$  conditions were taken from Molteni et al., (2018), while for the high  $\text{NO}_x$  conditions from Garmash et al., (2020).

While  $\text{NO}_3^-$  - CIMS is known to be selectively sensitive towards highly oxygenated multifunctional molecules and radicals formed in volatile organic compound (VOC) oxidation, it is almost completely insensitive toward the least oxygenated species and there are further limitations associated with the CIMS data interpretation. Firstly, the quantification of the detected species is challenging, due to the absence of calibration standards. Secondly, in routine operation, mass spectrometers cannot separate isomers and only exact chemical composition can be resolved. In this section, the focus shall be on the interpretation of ion count data of multifunctional molecules from  $\text{NO}_3^-$  CIMS.

To be detected by the MS instrument, the molecules of interest are first charged, and the charging in CIMS is done via ion – molecule reactions (ion, here:  $\text{NO}_3^-$ ). As described by Hyttinen et al., (2018), several processes occur in the ion-molecule reaction region within the CIMS:

SR1) Ionization may take place via deprotonation of the target molecule (RH) by the reagent ion ( $\text{Q}^-$ ).

SR2) The reagent ion can attach to the RH to form ion-molecule clusters.

SR3) The reagent ions may form stable reagent ion “dimers” ( $\text{QH}(\text{Q}^-)$ ) which may ionize the sample molecule via ligand exchange.

SR4) Clustering may also happen with the reagent ion dimer.

SR5) The ionization may also happen via ligand exchange reaction between the sample molecule and hydrates of the clustering ions.

SR6) Interaction of clustering ion and sampling molecule may also result in fragmentation.

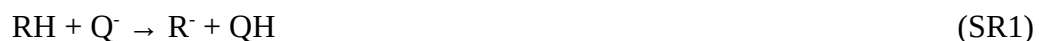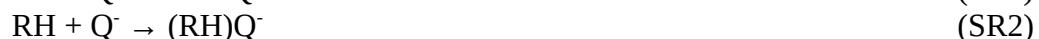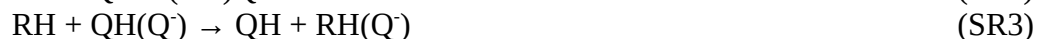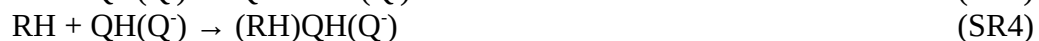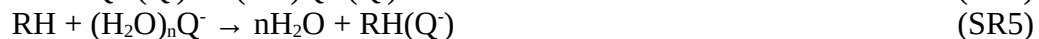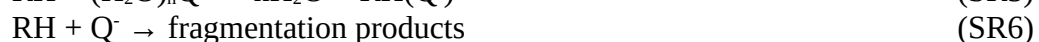

As a given molecule or a radical can be detected as different ions ( $\text{R}^-$ ,  $\text{RH}(\text{Q}^-)$ ,  $(\text{RH})\text{QH}(\text{Q}^-)$ ), it may be difficult to identify the composition of the parent species before it was ionized. Similarly, it is difficult to determine all signals related to one product. This problem is especially pronounced in high- $\text{NO}_x$  experiments, where formed oxidation products will contain multiple nitrogen and oxygen atoms. As a result, oxidation products charged by reagent ion dimer (SR4) can be confused with another N-containing oxidation product charged by reagent ion monomer (SR2).

In the present work, products observed in high  $\text{NO}_x$  oxidation of benzene in JPAC chamber (Garmash et al. 2020) were interpreted based on their timing. If signals of those ions correlated with  $R^2 > 0.9$ , they were classified as the same sample molecule. For example, ions at  $m/z$  201 and 264 were identified as  $\text{C}_6\text{H}_5\text{NO}_2 \cdot \text{NO}_3^-$  and  $\text{C}_6\text{H}_5\text{NO}_2 \cdot \text{HNO}_3 \cdot \text{NO}_3^-$  respectively. Signals of these ions varied closely during the experiments with  $R^2 = 0.995$  (see Fig S17). In this case, these ions were classified as the same molecule (nitrophenol) detected via ionization reactions (SR3) and (SR4) (Garmash et al. 2020, Yan et al. 2016). Similar analysis was performed on other ions.

The CIMS-signal conversion to a mixing ratio or number concentration is approached in different ways: For the simulations of flow tube results (data obtained from Molteni et al., 2018) the original data is reported already in  $\text{cm}^{-3}$ , and thus no conversion is needed. For the simulations of JPAC chamber experiments, a conversion factor of  $1.2 \cdot 10^{11} \text{ cm}^{-3}$  for “fraction of total signal” to  $\text{cm}^{-3}$  conversion is used. This conversion factor was derived from reproducing benzene oxidation mass spectra (under low  $\text{NO}_x$  conditions; see Garmash et al. - SI) in JPAC chamber by means of modelling. The conversion factor of  $1.2 \cdot 10^{11} \text{ cm}^{-3}$  best converted from experimental data to the simulated spectra.

### High $\text{NO}_x$ conditions

Benzene OH oxidation in the presence of high levels of  $\text{NO}_x$  is summarized in Fig S15. Panel A depicts the simulated and experimental (nitrate CIMS) (Garmash et al., 2020) distribution of molecular mass. The experimental data set serves to constrain the branching ratio for reaction R3 to either form the closed shell  $\text{RONO}_2$  species (R3a; see main manuscript) or the unstable alkoxy radical (R3b; see main manuscript). As recently reported (Xu et al., 2020) for the benzene system, the branching produces only a small share of nitrate species ( $\sim 0.2\%$  for bicyclic peroxy radicals and  $\sim 0.9\%$  for other peroxy radicals containing 6 carbon atoms). In the present work, nitrate yields from reaction R3 range from 0.1% (bicyclic peroxy radical) to 4%. Accordingly, unless the overall reaction rate constant  $k_{\text{RO}_2\text{-NO}}$  for reaction of  $\text{RO}_2$  species with  $\text{NO}$  is overestimated, a large amount of  $\text{RO}$  species are formed. We explored the potential of the latter path to explain experimentally observed mass spectra and, subsequently the impact on the SOA forming potential of the species formed that way. The reproduction of observed nitrate mass peaks is unproblematic, due to its small share in reaction R3. However, the computed dimer distribution (panel B) suggests underestimation of its main precursor, the  $\text{RO}_2$  species. This problem cannot be overcome, even if the yield of reaction R2 clearly dominates over R6 and R8 and literally all alkoxy radicals are transformed to peroxy radicals via autoxidation.

Investigation of the partition to the particle phase is shown in (Fig 3, panel E). The predicted and observed SOA formation differ with increasing hydrocarbon reacted. While the simulated yield can be characterized as constant (roughly 7%), the experimental SOA formation seems to increase the more of the precursor hydrocarbon reacts. Note that the experimental SOA formation data from literature was cut at  $100 \mu\text{g m}^{-3}$  as the OH precursor seems to be almost depleted. The additional oxidation and SOA formation is likely driven by  $\text{NO}_x/\text{HO}_x$  chemistry in the presence of UV light. This does not represent a well-defined chemical system which, accordingly, is not considered for analysis. Consequently, we further question the suggested mass yield of roughly 37% to be fully explained by the OH oxidation of benzene in the presence of  $\text{NO}_x$ .

### Distribution of saturation vapor pressures from group contribution methods

Deriving the saturation vapor pressure function for a specific standard substance can be done experimentally. However, many atmospherically relevant species feature unknown structures, are short lived or highly reactive. Additionally, the number of molecular structures originating from oxidation of a single precursor VOC can be huge (Goldstein and Galbally, 2007; Lightfoot et al., 1992). Thus, in order to overcome these challenges, group contribution methods may be consulted. Many of these methods exist featuring differing accuracy (O’Meara et al., 2014).

In the present work, saturation vapor pressures were derived with three different group contribution methods for all species: EVAPORATION (Compernelle et al., 2011), NANNOOLAL (Nannoolal et al., 2008) and MYRDAL/YALKOWSKI (Myrdal and Yalkowsky, 1997). Resulting saturation vapor pressure values at fixed temperature are shown in Fig S13. The methods were chosen based on an assessment which suggested NANNOOLAL to predict the normal boiling point best while

EVAPORATION and MYRDAL/YALKOWSKI reproduce SOA mass loadings most accurately amongst all investigated methods (O’Meara et al., 2014).

Saturation vapor pressures of few selected species are additionally computed using COSMO-RS including closed shell monomers and dimers. Subsequently, they are compared with group contribution methods (Fig S14). There is a considerable variation in the prediction of  $p_{\text{sat}}$  depending on the method chosen. For the non-nitrates, EVAPORATION shows the closest agreement with COSMO-RS, followed by NANNOOLAL. In the cases of closed shell nitrogen containing species, EVAPORATION shows least deviation from COSMO-RS. In the case of dimers, only two species have been analyzed due to the significant computational effort required. For both molecules, EVAPORATION overestimates the saturation vapor pressure by roughly one order of magnitude compared to the COSMO-RS. However, this may not be relevant in the atmosphere as the species will irreversibly partition to the particle phase due to their extremely low vapor pressure. Thus, we conclude that EVAPORATION is, based on the limited set of comparison with COSMO-RS results, the best method in the present case of benzene oxidation.

### Model input specifications

Main model inputs for the simulations reported are listed below for a) the flow tube simulations (table ST3), b) the JPAC chamber runs (table ST4 and ST5), c) the Caltech chamber runs (ST6) and d) the atmospheric yield study (ST2). The inputs for the atmospheric trajectory runs are less appropriate to be summarized in a table, however, it can be provided by the corresponding author (LP) upon request.

### Description of parametric yield calculations

In order to approach atmospherically relevant conditions, methane, CO and sunlight are considered. The sunlight intensity, based on experimentally determined spectrum, was set to a value resulting in an OH level of  $2 \cdot 10^6 \text{ cm}^{-3}$  in the presence of 200 ppb<sub>v</sub> of CO and 2 ppm of methane, the two largest atmospheric OH sinks. When conducting the simulations, the OH level was fixed in order to avoid bias by changing the VOC level. Losses of seed aerosol particles, VOC species or their products are neglected in these simulations.

Benzene and NO<sub>x</sub> concentrations are varied over a wide range covering observations from remote areas to strongly polluted regions (WHO, 2021; Sekar et al., 2019). OH concentrations are set to a moderate level and are kept constant for 10 hours. In case the mass yield, within this period, does not approach a constant or maximum value, respectively, OH is set to zero and simulations are continued for another 2 hours. Exemplary mass yield evolution simulations are depicted by Supplementary Fig S16. In panel A (“sim8”), the maximum mass yield is met at 2 h to 4.5 h after initiating the OH oxidation. Random fluctuations in the yield curve are numerical artifacts attributable to limited accuracy of integration time steps which were set to 5 s to limit computational costs. However, note that the final yield values are not affected. On the one hand, the fluctuations do not introduce a systematic offset, on the other hand yield values are averaged over a certain period, indicated by a purple square, to remove the fluctuations where necessary. Occasionally, no yield maximum is found within 10 hours of benzene oxidation, as shown by panel B. In this case, the yield value at  $t = 10$  hours represents the maximum mass yield.

Clearly, the data generated does not cover all possible conditions. Though, the seed aerosol mass and diameter, as well as the O<sub>3</sub> concentration, under the studied conditions, do not largely impact the mass yield. However, the OH level strongly impacts the result. See supporting information for effects of varying O<sub>3</sub>, seed aerosol mass, seed aerosol surface and OH for two conditions: one characterized by high mass yield (0.1 ppb<sub>v</sub> NO<sub>x</sub>/ 10 ppb<sub>v</sub> benzene) and the other characterized by low mass yield (10 ppb<sub>v</sub> NO<sub>x</sub> and 0.1 ppb<sub>v</sub> benzene).

Note that the NO<sub>x</sub> values can be converted to NO levels by multiplication times 1/11 as NO<sub>2</sub>:NO is set to 10:1.

### Specifications of autoAPRAM-benzene species

Basic molecular properties (in a format: name /C/H/O/N/ structure) for all APRAM species used in the model simulations are listed in table ST7.

#### autoAPRAM-fw – benzene scheme

Reaction rate coefficients are given in cm<sup>3</sup>molecules<sup>-1</sup>s<sup>-1</sup> if not stated differently. autoAPRAM-fw uses simple rate coefficients KDEC, KRO2NO and KRO2HO2 from MCM v3.3.1:

KDEC = 1E-6

KRO2NO = 2.7E-12\*EXP(360/TEMP)

KRO2HO2 = 2.91E-13\*EXP(1300/TEMP)

Reaction types marked by “Reaction (RX)” refer to reactions introduced in section “Setting up the gas phase chemistry”. Reactions {1} to {7} represent the initiation of autoAPRAM-fw RO2 species from MCM (i.e., the reactions where MCM species form autoAPRAM-fw peroxy radicals). The reactions {8} to {934} represent the autoxidation scheme for benzene created by the autoAPRAM-fw.

autoAPRAM-fw initiation from MCM

|     |                             |          |
|-----|-----------------------------|----------|
| {1} | BZBIPERO2 -> BZo_RO2_O7     | 0.32     |
| {2} | BZBIPERO -> BZeo_RO2_O6     | 0.1*KDEC |
| {3} | BZBIPERO2 -> C5_RO2_O6 + CO | 0.022    |
| {4} | BZEMUCO2 -> BZeo_RO2_O8     | 0.07     |
| {5} | BZEMUCO2 -> C5_RO2_O7 + CO: | 0.25     |
| {6} | PHENO2 -> BZeo_RO2_O8       | 0.07     |
| {7} | PHENO2 -> C5_RO2_O7 + CO:   | 0.25     |

Reaction (R1)

Autoxidation: RO<sub>2</sub> -> H-shift + O2 addition -> RO<sub>2</sub>

|      |                             |      |
|------|-----------------------------|------|
| {8}  | BZo_RO2_O7 -> BZo_RO2_O9    | 1.5  |
| {9}  | BZo_RO2_O9 -> BZo_RO2_O11   | 0.45 |
| {10} | BZeo_RO2_O6 -> BZeo_RO2_O8  | 0.1  |
| {11} | BZeo_RO2_O8 -> BZeo_RO2_O10 | 0.01 |

Reaction (R2)

Alkoxy radical autoxidation: RO -> RO<sub>2</sub>

|      |                            |           |
|------|----------------------------|-----------|
| {12} | BZo2_RO_O6 -> BZeo_RO2_O8  | KDEC*0.90 |
| {13} | BZo2_RO_O8 -> BZeo_RO2_O10 | KDEC*0.85 |
| {14} | BZeo2_RO_O5 -> BZo_RO2_O7  | KDEC*0.90 |
| {15} | BZeo2_RO_O7 -> BZo_RO2_O9  | KDEC*0.90 |
| {16} | BZeo2_RO_O9 -> BZo_RO2_O11 | KDEC*0.40 |
| {17} | BZo_RO_O6 -> BZeo_RO2_O8   | KDEC*0.2  |
| {18} | BZo_RO_O8 -> BZeo_RO2_O10  | KDEC*0.1  |
| {19} | BZeo_RO_O5 -> BZo_RO2_O7   | KDEC*0.45 |
| {20} | BZeo_RO_O7 -> BZo_RO2_O9   | KDEC*0.35 |
| {21} | BZeo_RO_O9 -> BZo_RO2_O11  | KDEC*0.45 |
| {22} | C5_RO_O5 -> C5_RO2_O7      | KDEC*0.90 |
| {23} | C5_RO_O6 -> C5_RO2_O8      | KDEC*0.90 |
| {24} | C5_RO_O7 -> C5_RO2_O9      | KDEC*0.85 |

{25} C5\_RO\_O8 -> C5\_RO2\_O10 KDEC\*0.70

#### Reaction (R3a)

Peroxy radicals reacting with NO to form RONO<sub>2</sub>: RO<sub>2</sub> + NO -> RONO<sub>2</sub>

{26} BZo\_RO2\_O7 + NO -> BZo\_O5\_NO3 KRO2NO\*0.009  
{27} BZo\_RO2\_O9 + NO -> BZo\_O7\_NO3 KRO2NO\*0.005  
{28} BZo\_RO2\_O11 + NO -> BZo\_O9\_NO3 KRO2NO\*0.12  
{29} BZeo\_RO2\_O6 + NO -> BZeo\_O4\_NO3 KRO2NO\*0.002  
{30} BZeo\_RO2\_O8 + NO -> BZeo\_O6\_NO3 KRO2NO\*0.006  
{31} BZeo\_RO2\_O10 + NO -> BZeo\_O8\_NO3 KRO2NO\*0.01  
{32} C5\_RO2\_O6 + NO -> C5e\_O4\_NO3 KRO2NO\*0.04  
{33} C5\_RO2\_O7 + NO -> C5\_O5\_NO3 KRO2NO\*0.004  
{34} C5\_RO2\_O8 + NO -> C5e\_O6\_NO3 KRO2NO\*0.008  
{35} C5\_RO2\_O9 + NO -> C5\_O7\_NO3 KRO2NO\*0.02  
{36} C5\_RO2\_O10 + NO -> C5e\_O8\_NO3 KRO2NO\*0.02

#### Reaction (R3b)

Peroxy radicals reacting with NO to form RO: RO<sub>2</sub> + NO -> RO + NO<sub>2</sub>

{37} BZo\_RO2\_O7 + NO -> BZo2\_RO\_O6 + NO2 KRO2NO\*0.897  
{38} BZo\_RO2\_O9 + NO -> BZo2\_RO\_O8 + NO2 KRO2NO\*0.978  
{39} BZo\_RO2\_O11 + NO -> BZo2\_RO\_O10 + NO2 KRO2NO\*0.93  
{40} BZeo\_RO2\_O6 + NO -> BZeo2\_RO\_O5 + NO2 KRO2NO\*0.898  
{41} BZeo\_RO2\_O8 + NO -> BZeo2\_RO\_O7 + NO2 KRO2NO\*0.894  
{42} BZeo\_RO2\_O10 + NO -> BZeo2\_RO\_O9 + NO2 KRO2NO\*0.59  
{43} C5\_RO2\_O6 + NO -> C5\_RO\_O5 + NO2 KRO2NO\*0.96  
{44} C5\_RO2\_O7 + NO -> C5\_RO\_O6 + NO2 KRO2NO\*0.998  
{45} C5\_RO2\_O8 + NO -> C5\_RO\_O7 + NO2 KRO2NO\*0.996  
{46} C5\_RO2\_O9 + NO -> C5\_RO\_O8 + NO2 KRO2NO\*0.98  
{47} C5\_RO2\_O10 + NO -> C5\_RO\_O9 + NO2 KRO2NO\*0.98

#### Reaction (R3c)

Peroxy radicals reacting with NO to form RCHO: RO<sub>2</sub> + NO -> RCHO + NO<sub>2</sub> + HO<sub>2</sub>

more detailed RO<sub>2</sub> + NO -> RO + NO<sub>2</sub> fast abstraction of H by O<sub>2</sub> eliminating of HO<sub>2</sub>: RCHO + HO<sub>2</sub>

{48} BZo\_RO2\_O7 + NO -> BZo\_O5\_O + NO2 + HO2 KRO2NO\*0.1  
{49} BZo\_RO2\_O9 + NO -> BZo\_O7\_O + NO2 + HO2 KRO2NO\*0.02  
{50} BZo\_RO2\_O11 + NO -> BZo\_O9\_O + NO2 + HO2 KRO2NO\*0.03  
{51} BZeo\_RO2\_O6 + NO -> BZeo\_O4\_O + NO2 + HO2 KRO2NO\*0.1  
{52} BZeo\_RO2\_O8 + NO -> BZeo\_O6\_O + NO2 + HO2 KRO2NO\*0.1  
{53} BZeo\_RO2\_O10 + NO -> BZeo\_O8\_O + NO2 + HO2 KRO2NO\*0.4

#### Reaction (R4a)

Peroxy radicals reacting with HO<sub>2</sub> forming closed shell species: RO<sub>2</sub> + HO<sub>2</sub> -> ROOH

{54} BZo\_RO2\_O7 + HO2 -> BZo\_O5\_OOH KRO2HO2\*0.77\*0.01  
{55} BZo\_RO2\_O9 + HO2 -> BZo\_O7\_OOH KRO2HO2\*0.77\*0.06  
{56} BZo\_RO2\_O11 + HO2 -> BZo\_O9\_OOH KRO2HO2\*0.77\*0.2  
{57} BZeo\_RO2\_O6 + HO2 -> BZeo\_O4\_OOH KRO2HO2\*0.77\*0.6  
{58} BZeo\_RO2\_O8 + HO2 -> BZeo\_O6\_OOH KRO2HO2\*0.77\*0.04  
{59} BZeo\_RO2\_O10 + HO2 -> BZeo\_O8\_OOH KRO2HO2\*0.77\*0.55  
{60} C5\_RO2\_O6 + HO2 -> C5e\_O4\_OOH KRO2HO2\*0.706\*0.005

|      |                                |                   |
|------|--------------------------------|-------------------|
| {61} | C5_RO2_O7 + HO2 -> C5_O5_OOH   | KRO2HO2*0.706*0.3 |
| {62} | C5_RO2_O8 + HO2 -> C5e_O6_OOH  | KRO2HO2*0.706*0.6 |
| {63} | C5_RO2_O9 + HO2 -> C5_O7_OOH   | KRO2HO2*0.706*0.1 |
| {64} | C5_RO2_O10 + HO2 -> C5e_O8_OOH | KRO2HO2*0.706*0.6 |

#### Reaction (R4b)

Peroxy radicals reacting with HO<sub>2</sub> forming RO + O<sub>2</sub> + OH:

|      |                                        |                    |
|------|----------------------------------------|--------------------|
| {65} | BZo_RO2_O7 + HO2 -> BZo_RO_O6 + OH     | KRO2HO2*0.99*0.77  |
| {66} | BZo_RO2_O9 + HO2 -> BZo_RO_O8 + OH:    | KRO2HO2*0.92*0.77  |
| {67} | BZo_RO2_O11 + HO2 -> BZo_RO_O10 + OH:  | KRO2HO2*0.85*0.77  |
| {68} | BZeo_RO2_O6 + HO2 -> BZeo_RO_O5 + OH:  | KRO2HO2*0.4*0.77   |
| {69} | BZeo_RO2_O8 + HO2 -> BZeo_RO_O7 + OH:  | KRO2HO2*0.98*0.77  |
| {70} | BZeo_RO2_O10 + HO2 -> BZeo_RO_O9 + OH: | KRO2HO2*0.45*0.77  |
| {71} | C5_RO2_O6 + HO2 -> MALDIAL + CO + HO2  | KRO2HO2*0.995*0.77 |
| {72} | C5_RO2_O7 + HO2 -> MALDIAL + CO + HO2  | KRO2HO2*0.4*0.77   |
| {73} | C5_RO2_O8 + HO2 -> MALDIAL + CO + HO2  | KRO2HO2*0.4*0.77   |
| {74} | C5_RO2_O9 + HO2 -> MALDIAL + CO + HO2  | KRO2HO2*0.9*0.77   |
| {75} | C5_RO2_O10 + HO2 -> MALDIAL + CO + HO2 | KRO2HO2*0.4*0.77   |

#### Reaction (R5a)

Peroxy radical reacting with pool of RO<sub>2</sub>s forming alkoxy radical by O removal:

|      |                            |                      |
|------|----------------------------|----------------------|
| {76} | BZo_RO2_O7 -> BZo_RO_O6    | RO2*2.62e-11*0.6*0.4 |
| {77} | BZo_RO2_O9 -> BZo_RO_O8    | RO2*5.38e-11*0.6*0.4 |
| {78} | BZo_RO2_O11 -> BZo_RO_O10  | RO2*8.14e-11*0.6*0.4 |
| {79} | BZeo_RO2_O6 -> BZeo_RO_O5  | RO2*1.24e-11*0.6*0.4 |
| {80} | BZeo_RO2_O8 -> BZeo_RO_O7  | RO2*4e-11*0.6*0.4    |
| {81} | BZeo_RO2_O10 -> BZeo_RO_O9 | RO2*6.76e-11*0.6*0.4 |

#### Reaction (R5b)

Peroxy radicals forming the dimer ROOR (i.e., accretion product)

RO<sub>2</sub> dimer formation: RO<sub>2</sub> + RO<sub>2</sub>" -> ROOR"

ROOR precursor BZo\_RO2\_O7

|      |                                           |               |
|------|-------------------------------------------|---------------|
| {82} | BZo_RO2_O7 + BZo_RO2_O7 -> BZoO6_BZoO6    | 4.17e-11*1.0  |
| {83} | BZo_RO2_O7 + BZo_RO2_O9 -> BZoO6_BZoO8    | 1.e-10*1.0    |
| {84} | BZo_RO2_O7 + BZo_RO2_O11 -> BZoO6_BZoO10  | 9.69e-11*1.0  |
| {85} | BZo_RO2_O7 + BZeo_RO2_O6 -> BZoO6_BZeoO5  | 2.79e-11*1.0  |
| {86} | BZo_RO2_O7 + BZeo_RO2_O8 -> BZoO6_BZeoO7  | 5.55e-11*1.0  |
| {87} | BZo_RO2_O7 + BZeo_RO2_O10 -> BZoO6_BZeoO9 | 8.31e-11*1.0  |
| {88} | BZo_RO2_O7 + C5_RO2_O6 -> BZoO6_C5eO5     | 4.51e-11*1.0  |
| {89} | BZo_RO2_O7 + C5_RO2_O7 -> BZoO6_C5O6      | 5.89e-11*1.0  |
| {90} | BZo_RO2_O7 + C5_RO2_O8 -> BZoO6_C5eO7     | 7.27e-11*1.0  |
| {91} | BZo_RO2_O7 + C5_RO2_O9 -> BZoO6_C5O8      | 8.65e-11*1.0  |
| {92} | BZo_RO2_O7 + C5_RO2_O10 -> BZoO6_C5eO9    | 1e-10*1.0     |
| {93} | BZo_RO2_O7 + BZBIPERO2 -> BZoO6_BZBI      | 1.41e-11*0.15 |
| {94} | BZo_RO2_O7 + BZEMUCCO3 -> BZoO6_BZMUa     | 1.24e-11*1.0  |
| {95} | BZo_RO2_O7 + BZEMUCO2 -> BZoO6_BZMUb      | 2.79e-11*1.0  |
| {96} | BZo_RO2_O7 + C5DIALO2 -> BZoO6_C5DI       | 3e-13*1.0     |
| {97} | BZo_RO2_O7 + NPHEO2 -> BZoO6_NPHa         | 6.67e-11*1.0  |
| {98} | BZo_RO2_O7 + PHENO2 -> BZoO6_PHEN         | 2.79e-11*1.0  |
| {99} | BZo_RO2_O7 + MALDIALCO3 -> BZoO6_MALa     | 3e-13*1.0     |

|                           |                                           |              |
|---------------------------|-------------------------------------------|--------------|
| {100}                     | BZo_RO2_07 + EPXDLCO3 -> BZoO6_EPX        | 3e-13*1.0    |
| {101}                     | BZo_RO2_07 + C3DIALO2 -> BZoO6_C3DI       | 3e-13*1.0    |
| {102}                     | BZo_RO2_07 + MALDIALO2 -> BZoO6_MALb      | 3e-13*1.0    |
| {103}                     | BZo_RO2_07 + C6H5O2 -> BZoO6_C6a          | 3e-13*1.0    |
| {104}                     | BZo_RO2_07 + NBZFUO2 -> BZoO6_NBZa        | 3.05e-11*1.0 |
| {105}                     | BZo_RO2_07 + BZFUO2 -> BZoO6_BZFU         | 3e-13*1.0    |
| {106}                     | BZo_RO2_07 + HCOCOHCOC3 -> BZoO6_C3a      | 3e-13*1.0    |
| {107}                     | BZo_RO2_07 + CATEC1O2 -> BZoO6_CATE       | 3e-13*1.0    |
| {108}                     | BZo_RO2_07 + HCOCO3 -> BZoO6_C2a          | 3e-13*1.0    |
| {109}                     | BZo_RO2_07 + HCOCH2O2 -> BZoO6_C2b        | 3e-13*1.0    |
| {110}                     | BZo_RO2_07 + NPHEN1O2 -> BZoO6_NPHb       | 9.78e-12*1.0 |
| {111}                     | BZo_RO2_07 + NNCATECO2 -> BZoO6_NNC       | 1e-10*1.0    |
| {112}                     | BZo_RO2_07 + NCATECO2 -> BZoO6_NCAT       | 8.05e-11*1.0 |
| {113}                     | BZo_RO2_07 + NBZQO2 -> BZoO6_NBZb         | 5.12e-11*1.0 |
| {114}                     | BZo_RO2_07 + PBZQO2 -> BZoO6_PBZ          | 1.24e-11*1.0 |
| {115}                     | BZo_RO2_07 + MALANHYO2 -> BZoO6_MALc      | 3.75e-12*1.0 |
| {116}                     | BZo_RO2_07 + NDNPHENO2 -> BZoO6_NDN       | 1e-10*1.0    |
| {117}                     | BZo_RO2_07 + DNPHEO2 -> BZoO6_DNP         | 1e-10*1.0    |
| {118}                     | BZo_RO2_07 + HOCH2CO3 -> BZoO6_C2c        | 3e-13*1.0    |
| {119}                     | BZo_RO2_07 + C5CO2OHCO3 -> BZoO6_C5a      | 2.62e-11*1.0 |
| {120}                     | BZo_RO2_07 + C4CO2DBCO3 -> BZoO6_C4a      | 3e-13*1.0    |
| ROOR precursor BZo_RO2_09 |                                           |              |
| {121}                     | BZo_RO2_09 + BZo_RO2_09 -> BZoO8_BZoO8    | 9.69e-11*1.0 |
| {122}                     | BZo_RO2_09 + BZo_RO2_011 -> BZoO8_BZoO10  | 1e-10*1.0    |
| {123}                     | BZo_RO2_09 + BZeo_RO2_06 -> BZoO8_BZeoO5  | 5.55e-11*1.0 |
| {124}                     | BZo_RO2_09 + BZeo_RO2_08 -> BZoO8_BZeoO7  | 8.31e-11*1.0 |
| {125}                     | BZo_RO2_09 + BZeo_RO2_010 -> BZoO8_BZeoO9 | 1e-10*1.0    |
| {126}                     | BZo_RO2_09 + C5_RO2_06 -> BZoO8_C5eO5     | 7.27e-11*1.0 |
| {127}                     | BZo_RO2_09 + C5_RO2_07 -> BZoO8_C5O6      | 8.65e-11*1.0 |
| {128}                     | BZo_RO2_09 + C5_RO2_08 -> BZoO8_C5eO7     | 1e-10*1.0    |
| {129}                     | BZo_RO2_09 + C5_RO2_09 -> BZoO8_C5O8      | 1e-10*1.0    |
| {130}                     | BZo_RO2_09 + C5_RO2_010 -> BZoO8_C5eO9    | 1e-10*1.0    |
| {131}                     | BZo_RO2_09 + BZBIPERO2 -> BZoO8_BZBI      | 4.17e-11*0.5 |
| {132}                     | BZo_RO2_09 + BZEMUCCO3 -> BZoO8_BZMUa     | 4e-11*1.0    |
| {133}                     | BZo_RO2_09 + BZEMUCO2 -> BZoO8_BZMUb      | 5.55e-11*1.0 |
| {134}                     | BZo_RO2_09 + C5DIALO2 -> BZoO8_C5DI       | 1.58e-11*1.0 |
| {135}                     | BZo_RO2_09 + NPHEO2 -> BZoO8_NPHa         | 9.43e-11*1.0 |
| {136}                     | BZo_RO2_09 + PHENO2 -> BZoO8_PHEN         | 5.55e-11*1.0 |
| {137}                     | BZo_RO2_09 + MALDIALCO3 -> BZoO8_MALa     | 3.75e-12*1.0 |
| {138}                     | BZo_RO2_09 + EPXDLCO3 -> BZoO8_EPX        | 1.75e-11*1.0 |
| {139}                     | BZo_RO2_09 + C3DIALO2 -> BZoO8_C3DI       | 3e-13*1.0    |
| {140}                     | BZo_RO2_09 + MALDIALO2 -> BZoO8_MALb      | 1.93e-11*1.0 |
| {141}                     | BZo_RO2_09 + C6H5O2 -> BZoO8_C6a          | 3e-13*1.0    |
| {142}                     | BZo_RO2_09 + NBZFUO2 -> BZoO8_NBZa        | 5.81e-11*1.0 |
| {143}                     | BZo_RO2_09 + BZFUO2 -> BZoO8_BZFU         | 1.93e-11*1.0 |
| {144}                     | BZo_RO2_09 + HCOCOHCOC3 -> BZoO8_C3a      | 7.2e-12*1.0  |
| {145}                     | BZo_RO2_09 + CATEC1O2 -> BZoO8_CATE       | 1.24e-11*1.0 |
| {146}                     | BZo_RO2_09 + HCOCO3 -> BZoO8_C2a          | 3e-13*1.0    |
| {147}                     | BZo_RO2_09 + HCOCH2O2 -> BZoO8_C2b        | 3e-13*1.0    |
| {148}                     | BZo_RO2_09 + NPHEN1O2 -> BZoO8_NPHb       | 3.74e-11*1.0 |

|                            |                                             |              |
|----------------------------|---------------------------------------------|--------------|
| {149}                      | BZo_RO2_O9 + NNCATECO2 -> BZoO8_NNC         | 1e-10*1.0    |
| {150}                      | BZo_RO2_O9 + NCATECO2 -> BZoO8_NCAT         | 1e-10*1.0    |
| {151}                      | BZo_RO2_O9 + NBZQO2 -> BZoO8_NBZb           | 7.87e-11*1.0 |
| {152}                      | BZo_RO2_O9 + PBZQO2 -> BZoO8_PBZ            | 4e-11*1.0    |
| {153}                      | BZo_RO2_O9 + MALANHYO2 -> BZoO8_MALc        | 3.13e-11*1.0 |
| {154}                      | BZo_RO2_O9 + NDNPHENO2 -> BZoO8_NDN         | 1e-10*1.0    |
| {155}                      | BZo_RO2_O9 + DNPHEO2 -> BZoO8_DNP           | 1e-10*1.0    |
| {156}                      | BZo_RO2_O9 + HOCH2CO3 -> BZoO8_C2c          | 3e-13*1.0    |
| {157}                      | BZo_RO2_O9 + C5CO2OHCO3 -> BZoO8_C5a        | 5.37e-11*1.0 |
| {158}                      | BZo_RO2_O9 + C4CO2DBCO3 -> BZoO8_C4a        | 2.79e-11*1.0 |
| ROOR precursor BZo_RO2_O11 |                                             |              |
| {159}                      | BZo_RO2_O11 + BZo_RO2_O11 -> BZoO10_BZoO10  | 1e-10*1.0    |
| {160}                      | BZo_RO2_O11 + BZeo_RO2_O6 -> BZoO10_BZeoO5  | 8.31e-11*1.0 |
| {161}                      | BZo_RO2_O11 + BZeo_RO2_O8 -> BZoO10_BZeoO7  | 1e-10*1.0    |
| {162}                      | BZo_RO2_O11 + BZeo_RO2_O10 -> BZoO10_BZeoO9 | 1e-10*1.0    |
| {163}                      | BZo_RO2_O11 + C5_RO2_O6 -> BZoO10_C5eO5     | 1e-10*1.0    |
| {164}                      | BZo_RO2_O11 + C5_RO2_O7 -> BZoO10_C5O6      | 1e-10*1.0    |
| {165}                      | BZo_RO2_O11 + C5_RO2_O8 -> BZoO10_C5eO7     | 1e-10*1.0    |
| {166}                      | BZo_RO2_O11 + C5_RO2_O9 -> BZoO10_C5O8      | 1e-10*1.0    |
| {167}                      | BZo_RO2_O11 + C5_RO2_O10 -> BZoO10_C5eO9    | 1e-10*1.0    |
| {168}                      | BZo_RO2_O11 + BZBIPERO2 -> BZoO10_BZBI      | 1.e-10*1.0   |
| {169}                      | BZo_RO2_O11 + BZEMUCCO3 -> BZoO10_BZMUa     | 6.75e-11*1.0 |
| {170}                      | BZo_RO2_O11 + BZEMUCO2 -> BZoO10_BZMUb      | 8.31e-11*1.0 |
| {171}                      | BZo_RO2_O11 + C5DIALO2 -> BZoO10_C5DI       | 4.34e-11*1.0 |
| {172}                      | BZo_RO2_O11 + NPHENO2 -> BZoO10_NPHa        | 1e-10*1.0    |
| {173}                      | BZo_RO2_O11 + PHENO2 -> BZoO10_PHEN         | 8.31e-11*1.0 |
| {174}                      | BZo_RO2_O11 + MALDIALCO3 -> BZoO10_MALa     | 3.13e-11*1.0 |
| {175}                      | BZo_RO2_O11 + EPXDLCO3 -> BZoO10_EPX        | 4.51e-11*1.0 |
| {176}                      | BZo_RO2_O11 + C3DIALO2 -> BZoO10_C3DI       | 2.1e-11*1.0  |
| {177}                      | BZo_RO2_O11 + MALDIALO2 -> BZoO10_MALb      | 4.69e-11*1.0 |
| {178}                      | BZo_RO2_O11 + C6H5O2 -> BZoO10_C6a          | 2.62e-11*1.0 |
| {179}                      | BZo_RO2_O11 + NBZFUO2 -> BZoO10_NBZa        | 8.56e-11*1.0 |
| {180}                      | BZo_RO2_O11 + BZFUO2 -> BZoO10_BZFU         | 4.69e-11*1.0 |
| {181}                      | BZo_RO2_O11 + HCOCOHCOC3 -> BZoO10_C3a      | 3.48e-11*1.0 |
| {182}                      | BZo_RO2_O11 + CATEC1O2 -> BZoO10_CATE       | 4e-11*1.0    |
| {183}                      | BZo_RO2_O11 + HCOCO3 -> BZoO10_C2a          | 8.92e-12*1.0 |
| {184}                      | BZo_RO2_O11 + HCOCH2O2 -> BZoO10_C2b        | 3e-13*1.0    |
| {185}                      | BZo_RO2_O11 + NPHEN1O2 -> BZoO10_NPHb       | 6.5e-11*1.0  |
| {186}                      | BZo_RO2_O11 + NNCATECO2 -> BZoO10_NNC       | 1e-10*1.0    |
| {187}                      | BZo_RO2_O11 + NCATECO2 -> BZoO10_NCAT       | 1e-10*1.0    |
| {188}                      | BZo_RO2_O11 + NBZQO2 -> BZoO10_NBZb         | 1e-10*1.0    |
| {189}                      | BZo_RO2_O11 + PBZQO2 -> BZoO10_PBZ          | 6.75e-11*1.0 |
| {190}                      | BZo_RO2_O11 + MALANHYO2 -> BZoO10_MALc      | 5.89e-11*1.0 |
| {191}                      | BZo_RO2_O11 + NDNPHENO2 -> BZoO10_NDN       | 1e-10*1.0    |
| {192}                      | BZo_RO2_O11 + DNPHEO2 -> BZoO10_DNP         | 1e-10*1.0    |
| {193}                      | BZo_RO2_O11 + HOCH2CO3 -> BZoO10_C2c        | 1.06e-11*1.0 |
| {194}                      | BZo_RO2_O11 + C5CO2OHCO3 -> BZoO10_C5a      | 8.13e-11*1.0 |
| {195}                      | BZo_RO2_O11 + C4CO2DBCO3 -> BZoO10_C4a      | 5.55e-11*1.0 |
| ROOR precursor BZeo_RO2_O6 |                                             |              |
| {196}                      | BZeo_RO2_O6 + BZeo_RO2_O6 -> BZeoO5_BZeoO5  | 1.41e-11*1.0 |



|                            |                                             |              |
|----------------------------|---------------------------------------------|--------------|
| {197}                      | BZeo_RO2_O6 + BZeo_RO2_O8 -> BZeoO5_BZeoO7  | 4.17e-11*1.0 |
| {198}                      | BZeo_RO2_O6 + BZeo_RO2_O10 -> BZeoO5_BZeoO9 | 1.e-10*1.0   |
| {199}                      | BZeo_RO2_O6 + C5_RO2_O6 -> BZeoO5_C5eO5     | 3.13e-11*1.0 |
| {200}                      | BZeo_RO2_O6 + C5_RO2_O7 -> BZeoO5_C5O6      | 4.51e-11*1.0 |
| {201}                      | BZeo_RO2_O6 + C5_RO2_O8 -> BZeoO5_C5eO7     | 5.89e-11*1.0 |
| {202}                      | BZeo_RO2_O6 + C5_RO2_O9 -> BZeoO5_C5O8      | 7.27e-11*1.0 |
| {203}                      | BZeo_RO2_O6 + C5_RO2_O10 -> BZeoO5_C5eO9    | 8.65e-11*1.0 |
| {204}                      | BZeo_RO2_O6 + BZBIPERO2 -> BZeoO5_BZBI      | 3e-13*1.0    |
| {205}                      | BZeo_RO2_O6 + BZEMUCCO3 -> BZeoO5_BZMUa     | 3e-13*1.0    |
| {206}                      | BZeo_RO2_O6 + BZEMUCO2 -> BZeoO5_BZMUb      | 1.41e-11*1.0 |
| {207}                      | BZeo_RO2_O6 + C5DIALO2 -> BZeoO5_C5DI       | 3e-13*1.0    |
| {208}                      | BZeo_RO2_O6 + NPHENO2 -> BZeoO5_NPHa        | 5.29e-11*1.0 |
| {209}                      | BZeo_RO2_O6 + PHENO2 -> BZeoO5_PHEN         | 1.41e-11*1.0 |
| {210}                      | BZeo_RO2_O6 + MALDIALCO3 -> BZeoO5_MALa     | 3e-13*1.0    |
| {211}                      | BZeo_RO2_O6 + EPXDLCO3 -> BZeoO5_EPX        | 3e-13*1.0    |
| {212}                      | BZeo_RO2_O6 + C3DIALO2 -> BZeoO5_C3DI       | 3e-13*1.0    |
| {213}                      | BZeo_RO2_O6 + MALDIALO2 -> BZeoO5_MALb      | 3e-13*1.0    |
| {214}                      | BZeo_RO2_O6 + C6H5O2 -> BZeoO5_C6a          | 3e-13*1.0    |
| {215}                      | BZeo_RO2_O6 + NBZFUO2 -> BZeoO5_NBZa        | 1.67e-11*1.0 |
| {216}                      | BZeo_RO2_O6 + BZFUO2 -> BZeoO5_BZFU         | 3e-13*1.0    |
| {217}                      | BZeo_RO2_O6 + HCOCOHCOC3 -> BZeoO5_C3a      | 3e-13*1.0    |
| {218}                      | BZeo_RO2_O6 + CATEC1O2 -> BZeoO5_CATE       | 3e-13*1.0    |
| {219}                      | BZeo_RO2_O6 + HCOCO3 -> BZeoO5_C2a          | 3e-13*1.0    |
| {220}                      | BZeo_RO2_O6 + HCOCH2O2 -> BZeoO5_C2b        | 3e-13*1.0    |
| {221}                      | BZeo_RO2_O6 + NPHEN1O2 -> BZeoO5_NPHb       | 3e-13*1.0    |
| {222}                      | BZeo_RO2_O6 + NNCATECO2 -> BZeoO5_NNC       | 1e-10*1.0    |
| {223}                      | BZeo_RO2_O6 + NCATECO2 -> BZeoO5_NCAT       | 6.67e-11*1.0 |
| {224}                      | BZeo_RO2_O6 + NBZQO2 -> BZeoO5_NBZb         | 3.74e-11*1.0 |
| {225}                      | BZeo_RO2_O6 + PBZQO2 -> BZeoO5_PBZ          | 3e-13*1.0    |
| {226}                      | BZeo_RO2_O6 + MALANHYO2 -> BZeoO5_MALc      | 3e-13*1.0    |
| {227}                      | BZeo_RO2_O6 + NDNPHENO2 -> BZeoO5_NDN       | 1e-10*1.0    |
| {228}                      | BZeo_RO2_O6 + DNPHEO2 -> BZeoO5_DNP         | 9.17e-11*1.0 |
| {229}                      | BZeo_RO2_O6 + HOCH2CO3 -> BZeoO5_C2c        | 3e-13*1.0    |
| {230}                      | BZeo_RO2_O6 + C5CO2OHCOC3 -> BZeoO5_C5a     | 1.24e-11*1.0 |
| {231}                      | BZeo_RO2_O6 + C4CO2DBCOC3 -> BZeoO5_C4a     | 3e-13*1.0    |
| ROOR precursor BZeo_RO2_O8 |                                             |              |
| {232}                      | BZeo_RO2_O8 + BZeo_RO2_O8 -> BZeoO7_BZeoO7  | 1.e-10*1.0   |
| {233}                      | BZeo_RO2_O8 + BZeo_RO2_O10 -> BZeoO7_BZeoO9 | 9.69e-11*1.0 |
| {234}                      | BZeo_RO2_O8 + C5_RO2_O6 -> BZeoO7_C5eO5     | 5.89e-11*1.0 |
| {235}                      | BZeo_RO2_O8 + C5_RO2_O7 -> BZeoO7_C5O6      | 7.27e-11*1.0 |
| {236}                      | BZeo_RO2_O8 + C5_RO2_O8 -> BZeoO7_C5eO7     | 8.65e-11*1.0 |
| {237}                      | BZeo_RO2_O8 + C5_RO2_O9 -> BZeoO7_C5O8      | 1e-10*1.0    |
| {238}                      | BZeo_RO2_O8 + C5_RO2_O10 -> BZeoO7_C5eO9    | 1e-10*1.0    |
| {239}                      | BZeo_RO2_O8 + BZBIPERO2 -> BZeoO7_BZBI      | 2.79e-11*0.3 |
| {240}                      | BZeo_RO2_O8 + BZEMUCCO3 -> BZeoO7_BZMUa     | 2.62e-11*1.0 |
| {241}                      | BZeo_RO2_O8 + BZEMUCO2 -> BZeoO7_BZMUb      | 4.17e-11*1.0 |
| {242}                      | BZeo_RO2_O8 + C5DIALO2 -> BZeoO7_C5DI       | 2.02e-12*1.0 |
| {243}                      | BZeo_RO2_O8 + NPHENO2 -> BZeoO7_NPHa        | 8.05e-11*1.0 |
| {244}                      | BZeo_RO2_O8 + PHENO2 -> BZeoO7_PHEN         | 4.17e-11*1.0 |
| {245}                      | BZeo_RO2_O8 + MALDIALCO3 -> BZeoO7_MALa     | 3e-13*1.0    |

|                             |                                              |              |
|-----------------------------|----------------------------------------------|--------------|
| {246}                       | BZeo_RO2_O8 + EPXDLCO3 -> BZeoO7_EPX         | 3.75e-12*1.0 |
| {247}                       | BZeo_RO2_O8 + C3DIALO2 -> BZeoO7_C3DI        | 3e-13*1.0    |
| {248}                       | BZeo_RO2_O8 + MALDIALO2 -> BZeoO7_MALb       | 5.47e-12*1.0 |
| {249}                       | BZeo_RO2_O8 + C6H5O2 -> BZeoO7_C6a           | 3e-13*1.0    |
| {250}                       | BZeo_RO2_O8 + NBZFUO2 -> BZeoO7_NBZa         | 4.43e-11*1.0 |
| {251}                       | BZeo_RO2_O8 + BZFUO2 -> BZeoO7_BZFU          | 5.47e-12*1.0 |
| {252}                       | BZeo_RO2_O8 + HCOCOHCOC3 -> BZeoO7_C3a       | 3e-13*1.0    |
| {253}                       | BZeo_RO2_O8 + CATEC1O2 -> BZeoO7_CATE        | 3e-13*1.0    |
| {254}                       | BZeo_RO2_O8 + HCOCO3 -> BZeoO7_C2a           | 3e-13*1.0    |
| {255}                       | BZeo_RO2_O8 + HCOCH2O2 -> BZeoO7_C2b         | 3e-13*1.0    |
| {256}                       | BZeo_RO2_O8 + NPHEN1O2 -> BZeoO7_NPHb        | 2.36e-11*1.0 |
| {257}                       | BZeo_RO2_O8 + NNCATECO2 -> BZeoO7_NNC        | 1e-10*1.0    |
| {258}                       | BZeo_RO2_O8 + NCATECO2 -> BZeoO7_NCAT        | 9.43e-11*1.0 |
| {259}                       | BZeo_RO2_O8 + NBZQO2 -> BZeoO7_NBZb          | 6.5e-11*1.0  |
| {260}                       | BZeo_RO2_O8 + PBZQO2 -> BZeoO7_PBZ           | 2.62e-11*1.0 |
| {261}                       | BZeo_RO2_O8 + MALANHYO2 -> BZeoO7_MALc       | 1.75e-11*1.0 |
| {262}                       | BZeo_RO2_O8 + NDNPHENO2 -> BZeoO7_NDN        | 1e-10*1.0    |
| {263}                       | BZeo_RO2_O8 + DNPHEO2 -> BZeoO7_DNP          | 1e-10*1.0    |
| {264}                       | BZeo_RO2_O8 + HOCH2CO3 -> BZeoO7_C2c         | 3e-13*1.0    |
| {265}                       | BZeo_RO2_O8 + C5CO2OHCOC3 -> BZeoO7_C5a      | 4e-11*1.0    |
| {266}                       | BZeo_RO2_O8 + C4CO2DBCOC3 -> BZeoO7_C4a      | 1.41e-11*1.0 |
| ROOR precursor BZeo_RO2_O10 |                                              |              |
| {267}                       | BZeo_RO2_O10 + BZeo_RO2_O10 -> BZeoO9_BZeoO9 | 1e-10*1.0    |
| {268}                       | BZeo_RO2_O10 + C5_RO2_O6 -> BZeoO9_C5eO5     | 8.65e-11*1.0 |
| {269}                       | BZeo_RO2_O10 + C5_RO2_O7 -> BZeoO9_C5O6      | 1e-10*1.0    |
| {270}                       | BZeo_RO2_O10 + C5_RO2_O8 -> BZeoO9_C5eO7     | 1e-10*1.0    |
| {271}                       | BZeo_RO2_O10 + C5_RO2_O9 -> BZeoO9_C5O8      | 1e-10*1.0    |
| {272}                       | BZeo_RO2_O10 + C5_RO2_O10 -> BZeoO9_C5eO9    | 1e-10*1.0    |
| {273}                       | BZeo_RO2_O10 + BZBIPERO2 -> BZeoO9_BZBI      | 5.55e-11*1.0 |
| {274}                       | BZeo_RO2_O10 + BZEMUCCO3 -> BZeoO9_BZMUa     | 5.37e-11*1.0 |
| {275}                       | BZeo_RO2_O10 + BZEMUCO2 -> BZeoO9_BZMUb      | 1.e-10*1.0   |
| {276}                       | BZeo_RO2_O10 + C5DIALO2 -> BZeoO9_C5DI       | 2.96e-11*1.0 |
| {277}                       | BZeo_RO2_O10 + NPHEO2 -> BZeoO9_NPHa         | 1e-10*1.0    |
| {278}                       | BZeo_RO2_O10 + PHENO2 -> BZeoO9_PHEN         | 1.e-10*1.0   |
| {279}                       | BZeo_RO2_O10 + MALDIALCO3 -> BZeoO9_MALa     | 1.75e-11*1.0 |
| {280}                       | BZeo_RO2_O10 + EPXDLCO3 -> BZeoO9_EPX        | 3.13e-11*1.0 |
| {281}                       | BZeo_RO2_O10 + C3DIALO2 -> BZeoO9_C3DI       | 7.2e-12*1.0  |
| {282}                       | BZeo_RO2_O10 + MALDIALO2 -> BZeoO9_MALb      | 3.31e-11*1.0 |
| {283}                       | BZeo_RO2_O10 + C6H5O2 -> BZeoO9_C6a          | 1.24e-11*1.0 |
| {284}                       | BZeo_RO2_O10 + NBZFUO2 -> BZeoO9_NBZa        | 7.19e-11*1.0 |
| {285}                       | BZeo_RO2_O10 + BZFUO2 -> BZeoO9_BZFU         | 3.31e-11*1.0 |
| {286}                       | BZeo_RO2_O10 + HCOCOHCOC3 -> BZeoO9_C3a      | 2.1e-11*1.0  |
| {287}                       | BZeo_RO2_O10 + CATEC1O2 -> BZeoO9_CATE       | 2.62e-11*1.0 |
| {288}                       | BZeo_RO2_O10 + HCOCO3 -> BZeoO9_C2a          | 3e-13*1.0    |
| {289}                       | BZeo_RO2_O10 + HCOCH2O2 -> BZeoO9_C2b        | 3e-13*1.0    |
| {290}                       | BZeo_RO2_O10 + NPHEN1O2 -> BZeoO9_NPHb       | 5.12e-11*1.0 |
| {291}                       | BZeo_RO2_O10 + NNCATECO2 -> BZeoO9_NNC       | 1e-10*1.0    |
| {292}                       | BZeo_RO2_O10 + NCATECO2 -> BZeoO9_NCAT       | 1e-10*1.0    |
| {293}                       | BZeo_RO2_O10 + NBZQO2 -> BZeoO9_NBZb         | 9.25e-11*1.0 |
| {294}                       | BZeo_RO2_O10 + PBZQO2 -> BZeoO9_PBZ          | 5.37e-11*1.0 |

|                          |                                         |              |
|--------------------------|-----------------------------------------|--------------|
| {295}                    | BZeo_RO2_O10 + MALANHYO2 -> BZeoO9_MALc | 4.51e-11*1.0 |
| {296}                    | BZeo_RO2_O10 + NDNPHENO2 -> BZeoO9_NDN  | 1e-10*1.0    |
| {297}                    | BZeo_RO2_O10 + DNPHEO2 -> BZeoO9_DNP    | 1e-10*1.0    |
| {298}                    | BZeo_RO2_O10 + HOCH2CO3 -> BZeoO9_C2c   | 3e-13*1.0    |
| {299}                    | BZeo_RO2_O10 + C5CO2OHCO3 -> BZeoO9_C5a | 6.75e-11*1.0 |
| {300}                    | BZeo_RO2_O10 + C4CO2DBCO3 -> BZeoO9_C4a | 4.17e-11*1.0 |
| ROOR precursor C5_RO2_O6 |                                         |              |
| {301}                    | C5_RO2_O6 + C5_RO2_O6 -> C5eO5_C5eO5    | 4.86e-11*1.0 |
| {302}                    | C5_RO2_O6 + C5_RO2_O7 -> C5eO5_C5O6     | 6.24e-11*1.0 |
| {303}                    | C5_RO2_O6 + C5_RO2_O8 -> C5eO5_C5eO7    | 7.62e-11*1.0 |
| {304}                    | C5_RO2_O6 + C5_RO2_O9 -> C5eO5_C5O8     | 9e-11*1.0    |
| {305}                    | C5_RO2_O6 + C5_RO2_O10 -> C5eO5_C5eO9   | 1e-10*1.0    |
| {306}                    | C5_RO2_O6 + BZBIPERO2 -> C5eO5_BZBI     | 1.75e-11*1.0 |
| {307}                    | C5_RO2_O6 + BZEMUCCO3 -> C5eO5_BZMUa    | 1.58e-11*1.0 |
| {308}                    | C5_RO2_O6 + BZEMUCO2 -> C5eO5_BZMUb     | 3.13e-11*1.0 |
| {309}                    | C5_RO2_O6 + C5DIALO2 -> C5eO5_C5DI      | 3e-13*1.0    |
| {310}                    | C5_RO2_O6 + NPHEO2 -> C5eO5_NPHa        | 7.01e-11*1.0 |
| {311}                    | C5_RO2_O6 + PHENO2 -> C5eO5_PHEN        | 3.13e-11*1.0 |
| {312}                    | C5_RO2_O6 + MALDIALCO3 -> C5eO5_MALa    | 3e-13*1.0    |
| {313}                    | C5_RO2_O6 + EPXDLCO3 -> C5eO5_EPX       | 3e-13*1.0    |
| {314}                    | C5_RO2_O6 + C3DIALO2 -> C5eO5_C3DI      | 3e-13*1.0    |
| {315}                    | C5_RO2_O6 + MALDIALO2 -> C5eO5_MALb     | 3e-13*1.0    |
| {316}                    | C5_RO2_O6 + C6H5O2 -> C5eO5_C6a         | 3e-13*1.0    |
| {317}                    | C5_RO2_O6 + NBZFUO2 -> C5eO5_NBZa       | 3.39e-11*1.0 |
| {318}                    | C5_RO2_O6 + BZFUO2 -> C5eO5_BZFU        | 3e-13*1.0    |
| {319}                    | C5_RO2_O6 + HCOCOHCO3 -> C5eO5_C3a      | 3e-13*1.0    |
| {320}                    | C5_RO2_O6 + CATEC1O2 -> C5eO5_CATE      | 3e-13*1.0    |
| {321}                    | C5_RO2_O6 + HCOCO3 -> C5eO5_C2a         | 3e-13*1.0    |
| {322}                    | C5_RO2_O6 + HCOCH2O2 -> C5eO5_C2b       | 3e-13*1.0    |
| {323}                    | C5_RO2_O6 + NPHEN1O2 -> C5eO5_NPHb      | 1.32e-11*1.0 |
| {324}                    | C5_RO2_O6 + NNCATECO2 -> C5eO5_NNC      | 1e-10*1.0    |
| {325}                    | C5_RO2_O6 + NCATECO2 -> C5eO5_NCAT      | 8.39e-11*1.0 |
| {326}                    | C5_RO2_O6 + NBZQO2 -> C5eO5_NBZb        | 5.46e-11*1.0 |
| {327}                    | C5_RO2_O6 + PBZQO2 -> C5eO5_PBZ         | 1.58e-11*1.0 |
| {328}                    | C5_RO2_O6 + MALANHYO2 -> C5eO5_MALc     | 7.2e-12*1.0  |
| {329}                    | C5_RO2_O6 + NDNPHENO2 -> C5eO5_NDN      | 1e-10*1.0    |
| {330}                    | C5_RO2_O6 + DNPHEO2 -> C5eO5_DNP        | 1e-10*1.0    |
| {331}                    | C5_RO2_O6 + HOCH2CO3 -> C5eO5_C2c       | 3e-13*1.0    |
| {332}                    | C5_RO2_O6 + C5CO2OHCO3 -> C5eO5_C5a     | 2.96e-11*1.0 |
| {333}                    | C5_RO2_O6 + C4CO2DBCO3 -> C5eO5_C4a     | 3.75e-12*1.0 |
| ROOR precursor C5_RO2_O7 |                                         |              |
| {334}                    | C5_RO2_O7 + C5_RO2_O7 -> C5O6_C5O6      | 7.62e-11*1.0 |
| {335}                    | C5_RO2_O7 + C5_RO2_O8 -> C5O6_C5eO7     | 9e-11*1.0    |
| {336}                    | C5_RO2_O7 + C5_RO2_O9 -> C5O6_C5O8      | 1e-10*1.0    |
| {337}                    | C5_RO2_O7 + C5_RO2_O10 -> C5O6_C5eO9    | 1e-10*1.0    |
| {338}                    | C5_RO2_O7 + BZBIPERO2 -> C5O6_BZBI      | 3.13e-11*1.0 |
| {339}                    | C5_RO2_O7 + BZEMUCCO3 -> C5O6_BZMUa     | 2.96e-11*1.0 |
| {340}                    | C5_RO2_O7 + BZEMUCO2 -> C5O6_BZMUb      | 4.51e-11*1.0 |
| {341}                    | C5_RO2_O7 + C5DIALO2 -> C5O6_C5DI       | 5.47e-12*1.0 |
| {342}                    | C5_RO2_O7 + NPHEO2 -> C5O6_NPHa         | 8.39e-11*1.0 |

|                          |                                       |              |
|--------------------------|---------------------------------------|--------------|
| {343}                    | C5_RO2_O7 + PHENO2 -> C5O6_PHEN       | 4.51e-11*1.0 |
| {344}                    | C5_RO2_O7 + MALDIALCO3 -> C5O6_MALa   | 3e-13*1.0    |
| {345}                    | C5_RO2_O7 + EPXDLCO3 -> C5O6_EPX      | 7.2e-12*1.0  |
| {346}                    | C5_RO2_O7 + C3DIALO2 -> C5O6_C3DI     | 3e-13*1.0    |
| {347}                    | C5_RO2_O7 + MALDIALO2 -> C5O6_MALb    | 8.92e-12*1.0 |
| {348}                    | C5_RO2_O7 + C6H5O2 -> C5O6_C6a        | 3e-13*1.0    |
| {349}                    | C5_RO2_O7 + NBZFUO2 -> C5O6_NBZa      | 4.77e-11*1.0 |
| {350}                    | C5_RO2_O7 + BZFUO2 -> C5O6_BZFU       | 8.92e-12*1.0 |
| {351}                    | C5_RO2_O7 + HCOCOHCO3 -> C5O6_C3a     | 3e-13*1.0    |
| {352}                    | C5_RO2_O7 + CATEC1O2 -> C5O6_CATE     | 2.02e-12*1.0 |
| {353}                    | C5_RO2_O7 + HCOCO3 -> C5O6_C2a        | 3e-13*1.0    |
| {354}                    | C5_RO2_O7 + HCOCH2O2 -> C5O6_C2b      | 3e-13*1.0    |
| {355}                    | C5_RO2_O7 + NPHEN1O2 -> C5O6_NPHb     | 2.7e-11*1.0  |
| {356}                    | C5_RO2_O7 + NNCATECO2 -> C5O6_NNC     | 1e-10*1.0    |
| {357}                    | C5_RO2_O7 + NCATECO2 -> C5O6_NCAT     | 9.77e-11*1.0 |
| {358}                    | C5_RO2_O7 + NBZQO2 -> C5O6_NBZb       | 6.84e-11*1.0 |
| {359}                    | C5_RO2_O7 + PBZQO2 -> C5O6_PBZ        | 2.96e-11*1.0 |
| {360}                    | C5_RO2_O7 + MALANHYO2 -> C5O6_MALc    | 2.1e-11*1.0  |
| {361}                    | C5_RO2_O7 + NDNPHENO2 -> C5O6_NDN     | 1e-10*1.0    |
| {362}                    | C5_RO2_O7 + DNPHEO2 -> C5O6_DNP       | 1e-10*1.0    |
| {363}                    | C5_RO2_O7 + HOCH2CO3 -> C5O6_C2c      | 3e-13*1.0    |
| {364}                    | C5_RO2_O7 + C5CO2OHCOC3 -> C5O6_C5a   | 4.34e-11*1.0 |
| {365}                    | C5_RO2_O7 + C4CO2DBCOC3 -> C5O6_C4a   | 1.75e-11*1.0 |
| ROOR precursor C5_RO2_O8 |                                       |              |
| {366}                    | C5_RO2_O8 + C5_RO2_O8 -> C5eO7_C5eO7  | 1e-10*1.0    |
| {367}                    | C5_RO2_O8 + C5_RO2_O9 -> C5eO7_C5O8   | 1e-10*1.0    |
| {368}                    | C5_RO2_O8 + C5_RO2_O10 -> C5eO7_C5eO9 | 1e-10*1.0    |
| {369}                    | C5_RO2_O8 + BZBIPERO2 -> C5eO7_BZBI   | 4.51e-11*0.3 |
| {370}                    | C5_RO2_O8 + BZEMUCCO3 -> C5eO7_BZMUa  | 4.34e-11*1.0 |
| {371}                    | C5_RO2_O8 + BZEMUCO2 -> C5eO7_BZMUb   | 5.89e-11*1.0 |
| {372}                    | C5_RO2_O8 + C5DIALO2 -> C5eO7_C5DI    | 1.93e-11*1.0 |
| {373}                    | C5_RO2_O8 + NPHEO2 -> C5eO7_NPHa      | 9.77e-11*1.0 |
| {374}                    | C5_RO2_O8 + PHENO2 -> C5eO7_PHEN      | 5.89e-11*1.0 |
| {375}                    | C5_RO2_O8 + MALDIALCO3 -> C5eO7_MALa  | 7.2e-12*1.0  |
| {376}                    | C5_RO2_O8 + EPXDLCO3 -> C5eO7_EPX     | 2.1e-11*1.0  |
| {377}                    | C5_RO2_O8 + C3DIALO2 -> C5eO7_C3DI    | 3e-13*1.0    |
| {378}                    | C5_RO2_O8 + MALDIALO2 -> C5eO7_MALb   | 2.27e-11*1.0 |
| {379}                    | C5_RO2_O8 + C6H5O2 -> C5eO7_C6a       | 2.02e-12*1.0 |
| {380}                    | C5_RO2_O8 + NBZFUO2 -> C5eO7_NBZa     | 6.15e-11*1.0 |
| {381}                    | C5_RO2_O8 + BZFUO2 -> C5eO7_BZFU      | 2.27e-11*1.0 |
| {382}                    | C5_RO2_O8 + HCOCOHCO3 -> C5eO7_C3a    | 1.06e-11*1.0 |
| {383}                    | C5_RO2_O8 + CATEC1O2 -> C5eO7_CATE    | 1.58e-11*1.0 |
| {384}                    | C5_RO2_O8 + HCOCO3 -> C5eO7_C2a       | 3e-13*1.0    |
| {385}                    | C5_RO2_O8 + HCOCH2O2 -> C5eO7_C2b     | 3e-13*1.0    |
| {386}                    | C5_RO2_O8 + NPHEN1O2 -> C5eO7_NPHb    | 4.08e-11*1.0 |
| {387}                    | C5_RO2_O8 + NNCATECO2 -> C5eO7_NNC    | 1e-10*1.0    |
| {388}                    | C5_RO2_O8 + NCATECO2 -> C5eO7_NCAT    | 1e-10*1.0    |
| {389}                    | C5_RO2_O8 + NBZQO2 -> C5eO7_NBZb      | 8.22e-11*1.0 |
| {390}                    | C5_RO2_O8 + PBZQO2 -> C5eO7_PBZ       | 4.34e-11*1.0 |
| {391}                    | C5_RO2_O8 + MALANHYO2 -> C5eO7_MALc   | 3.48e-11*1.0 |

|                           |                                        |              |
|---------------------------|----------------------------------------|--------------|
| {392}                     | C5_RO2_O8 + NDNPHENO2 -> C5eO7_NDN     | 1e-10*1.0    |
| {393}                     | C5_RO2_O8 + DNPHEO2 -> C5eO7_DNP       | 1e-10*1.0    |
| {394}                     | C5_RO2_O8 + HOCH2CO3 -> C5eO7_C2c      | 3e-13*1.0    |
| {395}                     | C5_RO2_O8 + C5CO2OHC03 -> C5eO7_C5a    | 5.72e-11*1.0 |
| {396}                     | C5_RO2_O8 + C4CO2DBC03 -> C5eO7_C4a    | 3.13e-11*1.0 |
| ROOR precursor C5_RO2_O9  |                                        |              |
| {397}                     | C5_RO2_O9 + C5_RO2_O9 -> C5O8_C5O8     | 1e-10*1.0    |
| {398}                     | C5_RO2_O9 + C5_RO2_O10 -> C5O8_C5eO9   | 1e-10*1.0    |
| {399}                     | C5_RO2_O9 + BZBIPERO2 -> C5O8_BZBI     | 5.89e-11*1.0 |
| {400}                     | C5_RO2_O9 + BZEMUCCO3 -> C5O8_BZMUa    | 5.72e-11*1.0 |
| {401}                     | C5_RO2_O9 + BZEMUCO2 -> C5O8_BZMUb     | 7.27e-11*1.0 |
| {402}                     | C5_RO2_O9 + C5DIALO2 -> C5O8_C5DI      | 3.31e-11*1.0 |
| {403}                     | C5_RO2_O9 + NPHENO2 -> C5O8_NPHa       | 1e-10*1.0    |
| {404}                     | C5_RO2_O9 + PHENO2 -> C5O8_PHEN        | 7.27e-11*1.0 |
| {405}                     | C5_RO2_O9 + MALDIALCO3 -> C5O8_MALa    | 2.1e-11*1.0  |
| {406}                     | C5_RO2_O9 + EPXDLCO3 -> C5O8_EPX       | 3.48e-11*1.0 |
| {407}                     | C5_RO2_O9 + C3DIALO2 -> C5O8_C3DI      | 1.06e-11*1.0 |
| {408}                     | C5_RO2_O9 + MALDIALO2 -> C5O8_MALb     | 3.65e-11*1.0 |
| {409}                     | C5_RO2_O9 + C6H5O2 -> C5O8_C6a         | 1.58e-11*1.0 |
| {410}                     | C5_RO2_O9 + NBZFUO2 -> C5O8_NBZa       | 7.53e-11*1.0 |
| {411}                     | C5_RO2_O9 + BZFUO2 -> C5O8_BZFU        | 3.65e-11*1.0 |
| {412}                     | C5_RO2_O9 + HCOCOHCO3 -> C5O8_C3a      | 2.44e-11*1.0 |
| {413}                     | C5_RO2_O9 + CATEC1O2 -> C5O8_CATE      | 2.96e-11*1.0 |
| {414}                     | C5_RO2_O9 + HCOCO3 -> C5O8_C2a         | 3e-13*1.0    |
| {415}                     | C5_RO2_O9 + HCOCH2O2 -> C5O8_C2b       | 3e-13*1.0    |
| {416}                     | C5_RO2_O9 + NPHEN1O2 -> C5O8_NPHb      | 5.46e-11*1.0 |
| {417}                     | C5_RO2_O9 + NNCATECO2 -> C5O8_NNC      | 1e-10*1.0    |
| {418}                     | C5_RO2_O9 + NCATECO2 -> C5O8_NCAT      | 1e-10*1.0    |
| {419}                     | C5_RO2_O9 + NBZQO2 -> C5O8_NBZb        | 9.6e-11*1.0  |
| {420}                     | C5_RO2_O9 + PBZQO2 -> C5O8_PBZ         | 5.72e-11*1.0 |
| {421}                     | C5_RO2_O9 + MALANHYO2 -> C5O8_MALc     | 4.86e-11*1.0 |
| {422}                     | C5_RO2_O9 + NDNPHENO2 -> C5O8_NDN      | 1e-10*1.0    |
| {423}                     | C5_RO2_O9 + DNPHEO2 -> C5O8_DNP        | 1e-10*1.0    |
| {424}                     | C5_RO2_O9 + HOCH2CO3 -> C5O8_C2c       | 3e-13*1.0    |
| {425}                     | C5_RO2_O9 + C5CO2OHC03 -> C5O8_C5a     | 7.1e-11*1.0  |
| {426}                     | C5_RO2_O9 + C4CO2DBC03 -> C5O8_C4a     | 4.51e-11*1.0 |
| ROOR precursor C5_RO2_O10 |                                        |              |
| {427}                     | C5_RO2_O10 + C5_RO2_O10 -> C5eO9_C5eO9 | 1e-10*1.0    |
| {428}                     | C5_RO2_O10 + BZBIPERO2 -> C5eO9_BZBI   | 7.27e-11*1.0 |
| {429}                     | C5_RO2_O10 + BZEMUCCO3 -> C5eO9_BZMUa  | 7.1e-11*1.0  |
| {430}                     | C5_RO2_O10 + BZEMUCO2 -> C5eO9_BZMUb   | 8.65e-11*1.0 |
| {431}                     | C5_RO2_O10 + C5DIALO2 -> C5eO9_C5DI    | 4.69e-11*1.0 |
| {432}                     | C5_RO2_O10 + NPHENO2 -> C5eO9_NPHa     | 1e-10*1.0    |
| {433}                     | C5_RO2_O10 + PHENO2 -> C5eO9_PHEN      | 8.65e-11*1.0 |
| {434}                     | C5_RO2_O10 + MALDIALCO3 -> C5eO9_MALa  | 3.48e-11*1.0 |
| {435}                     | C5_RO2_O10 + EPXDLCO3 -> C5eO9_EPX     | 4.86e-11*1.0 |
| {436}                     | C5_RO2_O10 + C3DIALO2 -> C5eO9_C3DI    | 2.44e-11*1.0 |
| {437}                     | C5_RO2_O10 + MALDIALO2 -> C5eO9_MALb   | 5.03e-11*1.0 |
| {438}                     | C5_RO2_O10 + C6H5O2 -> C5eO9_C6a       | 2.96e-11*1.0 |
| {439}                     | C5_RO2_O10 + NBZFUO2 -> C5eO9_NBZa     | 8.91e-11*1.0 |

|       |                                      |              |
|-------|--------------------------------------|--------------|
| {440} | C5_RO2_O10 + BZFUO2 -> C5eO9_BZFU    | 5.03e-11*1.0 |
| {441} | C5_RO2_O10 + HCOCO3 -> C5eO9_C3a     | 3.82e-11*1.0 |
| {442} | C5_RO2_O10 + CATEC1O2 -> C5eO9_CATE  | 4.34e-11*1.0 |
| {443} | C5_RO2_O10 + HCOCO3 -> C5eO9_C2a     | 1.24e-11*1.0 |
| {444} | C5_RO2_O10 + HCOCH2O2 -> C5eO9_C2b   | 3e-13*1.0    |
| {445} | C5_RO2_O10 + NPHEN1O2 -> C5eO9_NPHb  | 6.84e-11*1.0 |
| {446} | C5_RO2_O10 + NNCATECO2 -> C5eO9_NNC  | 1e-10*1.0    |
| {447} | C5_RO2_O10 + NCATECO2 -> C5eO9_NCAT  | 1e-10*1.0    |
| {448} | C5_RO2_O10 + NBZQO2 -> C5eO9_NBZb    | 1e-10*1.0    |
| {449} | C5_RO2_O10 + PBZQO2 -> C5eO9_PBZ     | 7.1e-11*1.0  |
| {450} | C5_RO2_O10 + MALANHYO2 -> C5eO9_MALc | 6.24e-11*1.0 |
| {451} | C5_RO2_O10 + NDNPHENO2 -> C5eO9_NDN  | 1e-10*1.0    |
| {452} | C5_RO2_O10 + DNPHEO2 -> C5eO9_DNP    | 1e-10*1.0    |
| {453} | C5_RO2_O10 + HOCH2CO3 -> C5eO9_C2c   | 1.41e-11*1.0 |
| {454} | C5_RO2_O10 + C5CO2OHCO3 -> C5eO9_C5a | 8.48e-11*1.0 |
| {455} | C5_RO2_O10 + C4CO2DBCO3 -> C5eO9_C4a | 5.89e-11*1.0 |

ROOR precursor BZBIPERO2

|       |                                     |              |
|-------|-------------------------------------|--------------|
| {456} | BZBIPERO2 + BZBIPERO2 -> BZBI_BZBI  | 3e-13*0.7    |
| {457} | BZBIPERO2 + BZEMUCCO3 -> BZBI_BZMUa | 3e-13*1.0    |
| {458} | BZBIPERO2 + BZEMUCO2 -> BZBI_BZMUb  | 3e-13*1.0    |
| {459} | BZBIPERO2 + C5DIALO2 -> BZBI_C5DI   | 3e-13*1.0    |
| {460} | BZBIPERO2 + NPHEO2 -> BZBI_NPHa     | 3.91e-11*1.0 |
| {461} | BZBIPERO2 + PHENO2 -> BZBI_PHEN     | 3e-13*1.0    |
| {462} | BZBIPERO2 + MALDIALCO3 -> BZBI_MALa | 3e-13*1.0    |
| {463} | BZBIPERO2 + EPXDLCO3 -> BZBI_EPX    | 3e-13*1.0    |
| {464} | BZBIPERO2 + C3DIALO2 -> BZBI_C3DI   | 3e-13*1.0    |
| {465} | BZBIPERO2 + MALDIALO2 -> BZBI_MALb  | 3e-13*1.0    |
| {466} | BZBIPERO2 + C6H5O2 -> BZBI_C6a      | 3e-13*1.0    |
| {467} | BZBIPERO2 + NBZFUO2 -> BZBI_NBZa    | 2.89e-12*1.0 |
| {468} | BZBIPERO2 + BZFUO2 -> BZBI_BZFU     | 3e-13*1.0    |
| {469} | BZBIPERO2 + HCOCO3 -> BZBI_C3a      | 3e-13*1.0    |
| {470} | BZBIPERO2 + CATEC1O2 -> BZBI_CATE   | 3e-13*1.0    |
| {471} | BZBIPERO2 + HCOCO3 -> BZBI_C2a      | 3e-13*1.0    |
| {472} | BZBIPERO2 + HCOCH2O2 -> BZBI_C2b    | 3e-13*1.0    |
| {473} | BZBIPERO2 + NPHEN1O2 -> BZBI_NPHb   | 3e-13*1.0    |
| {474} | BZBIPERO2 + NNCATECO2 -> BZBI_NNC   | 9.17e-11*1.0 |
| {475} | BZBIPERO2 + NCATECO2 -> BZBI_NCAT   | 5.29e-11*1.0 |
| {476} | BZBIPERO2 + NBZQO2 -> BZBI_NBZb     | 2.36e-11*1.0 |
| {477} | BZBIPERO2 + PBZQO2 -> BZBI_PBZ      | 3e-13*1.0    |
| {478} | BZBIPERO2 + MALANHYO2 -> BZBI_MALc  | 3e-13*1.0    |
| {479} | BZBIPERO2 + NDNPHENO2 -> BZBI_NDN   | 1e-10*1.0    |
| {480} | BZBIPERO2 + DNPHEO2 -> BZBI_DNP     | 7.79e-11*1.0 |
| {481} | BZBIPERO2 + HOCH2CO3 -> BZBI_C2c    | 3e-13*1.0    |
| {482} | BZBIPERO2 + C5CO2OHCO3 -> BZBI_C5a  | 3e-13*1.0    |
| {483} | BZBIPERO2 + C4CO2DBCO3 -> BZBI_C4a  | 3e-13*1.0    |

ROOR precursor BZEMUCCO3

|       |                                      |              |
|-------|--------------------------------------|--------------|
| {484} | BZEMUCCO3 + BZEMUCCO3 -> BZMUa_BZMUa | 3e-13*1.0    |
| {485} | BZEMUCCO3 + BZEMUCO2 -> BZMUa_BZMUb  | 3e-13*1.0    |
| {486} | BZEMUCCO3 + C5DIALO2 -> BZMUa_C5DI   | 3e-13*1.0    |
| {487} | BZEMUCCO3 + NPHEO2 -> BZMUa_NPHa     | 3.74e-11*1.0 |

|       |                                      |              |
|-------|--------------------------------------|--------------|
| {488} | BZEMUCCO3 + PHENO2 -> BZMUa_PHEN     | 3e-13*1.0    |
| {489} | BZEMUCCO3 + MALDIALCO3 -> BZMUa_MALa | 3e-13*1.0    |
| {490} | BZEMUCCO3 + EPXDLCO3 -> BZMUa_EPX    | 3e-13*1.0    |
| {491} | BZEMUCCO3 + C3DIALO2 -> BZMUa_C3DI   | 3e-13*1.0    |
| {492} | BZEMUCCO3 + MALDIALO2 -> BZMUa_MALb  | 3e-13*1.0    |
| {493} | BZEMUCCO3 + C6H5O2 -> BZMUa_C6a      | 3e-13*1.0    |
| {494} | BZEMUCCO3 + NBZFUO2 -> BZMUa_NBZa    | 1.16e-12*1.0 |
| {495} | BZEMUCCO3 + BZFUO2 -> BZMUa_BZFU     | 3e-13*1.0    |
| {496} | BZEMUCCO3 + HCOCOHCO3 -> BZMUa_C3a   | 3e-13*1.0    |
| {497} | BZEMUCCO3 + CATEC1O2 -> BZMUa_CATE   | 3e-13*1.0    |
| {498} | BZEMUCCO3 + HCOCO3 -> BZMUa_C2a      | 3e-13*1.0    |
| {499} | BZEMUCCO3 + HCOCH2O2 -> BZMUa_C2b    | 3e-13*1.0    |
| {500} | BZEMUCCO3 + NPHEN1O2 -> BZMUa_NPHb   | 3e-13*1.0    |
| {501} | BZEMUCCO3 + NNCATECO2 -> BZMUa_NNC   | 9e-11*1.0    |
| {502} | BZEMUCCO3 + NCATECO2 -> BZMUa_NCAT   | 5.12e-11*1.0 |
| {503} | BZEMUCCO3 + NBZQO2 -> BZMUa_NBZb     | 2.19e-11*1.0 |
| {504} | BZEMUCCO3 + PBZQO2 -> BZMUa_PBZ      | 3e-13*1.0    |
| {505} | BZEMUCCO3 + MALANHYO2 -> BZMUa_MALc  | 3e-13*1.0    |
| {506} | BZEMUCCO3 + NDNPHENO2 -> BZMUa_NDN   | 1e-10*1.0    |
| {507} | BZEMUCCO3 + DNPHEO2 -> BZMUa_DNP     | 7.62e-11*1.0 |
| {508} | BZEMUCCO3 + HOCH2CO3 -> BZMUa_C2c    | 3e-13*1.0    |
| {509} | BZEMUCCO3 + C5CO2OHCO3 -> BZMUa_C5a  | 3e-13*1.0    |
| {510} | BZEMUCCO3 + C4CO2DBCO3 -> BZMUa_C4a  | 3e-13*1.0    |

ROOR precursor BZEMUCO2

|       |                                     |              |
|-------|-------------------------------------|--------------|
| {511} | BZEMUCO2 + BZEMUCO2 -> BZMUb_BZMUb  | 1.41e-11*1.0 |
| {512} | BZEMUCO2 + C5DIALO2 -> BZMUb_C5DI   | 3e-13*1.0    |
| {513} | BZEMUCO2 + NPHENO2 -> BZMUb_NPHa    | 5.29e-11*1.0 |
| {514} | BZEMUCO2 + PHENO2 -> BZMUb_PHEN     | 1.41e-11*1.0 |
| {515} | BZEMUCO2 + MALDIALCO3 -> BZMUb_MALa | 3e-13*1.0    |
| {516} | BZEMUCO2 + EPXDLCO3 -> BZMUb_EPX    | 3e-13*1.0    |
| {517} | BZEMUCO2 + C3DIALO2 -> BZMUb_C3DI   | 3e-13*1.0    |
| {518} | BZEMUCO2 + MALDIALO2 -> BZMUb_MALb  | 3e-13*1.0    |
| {519} | BZEMUCO2 + C6H5O2 -> BZMUb_C6a      | 3e-13*1.0    |
| {520} | BZEMUCO2 + NBZFUO2 -> BZMUb_NBZa    | 1.67e-11*1.0 |
| {521} | BZEMUCO2 + BZFUO2 -> BZMUb_BZFU     | 3e-13*1.0    |
| {522} | BZEMUCO2 + HCOCOHCO3 -> BZMUb_C3a   | 3e-13*1.0    |
| {523} | BZEMUCO2 + CATEC1O2 -> BZMUb_CATE   | 3e-13*1.0    |
| {524} | BZEMUCO2 + HCOCO3 -> BZMUb_C2a      | 3e-13*1.0    |
| {525} | BZEMUCO2 + HCOCH2O2 -> BZMUb_C2b    | 3e-13*1.0    |
| {526} | BZEMUCO2 + NPHEN1O2 -> BZMUb_NPHb   | 3e-13*1.0    |
| {527} | BZEMUCO2 + NNCATECO2 -> BZMUb_NNC   | 1e-10*1.0    |
| {528} | BZEMUCO2 + NCATECO2 -> BZMUb_NCAT   | 6.67e-11*1.0 |
| {529} | BZEMUCO2 + NBZQO2 -> BZMUb_NBZb     | 3.74e-11*1.0 |
| {530} | BZEMUCO2 + PBZQO2 -> BZMUb_PBZ      | 3e-13*1.0    |
| {531} | BZEMUCO2 + MALANHYO2 -> BZMUb_MALc  | 3e-13*1.0    |
| {532} | BZEMUCO2 + NDNPHENO2 -> BZMUb_NDN   | 1e-10*1.0    |
| {533} | BZEMUCO2 + DNPHEO2 -> BZMUb_DNP     | 9.17e-11*1.0 |
| {534} | BZEMUCO2 + HOCH2CO3 -> BZMUb_C2c    | 3e-13*1.0    |
| {535} | BZEMUCO2 + C5CO2OHCO3 -> BZMUb_C5a  | 1.24e-11*1.0 |
| {536} | BZEMUCO2 + C4CO2DBCO3 -> BZMUb_C4a  | 3e-13*1.0    |

## ROOR precursor C5DIALO2

|       |                                    |              |
|-------|------------------------------------|--------------|
| {537} | C5DIALO2 + C5DIALO2 -> C5DI_C5DI   | 3e-13*1.0    |
| {538} | C5DIALO2 + NPHEO2 -> C5DI_NPHa     | 1.32e-11*1.0 |
| {539} | C5DIALO2 + PHENO2 -> C5DI_PHEN     | 3e-13*1.0    |
| {540} | C5DIALO2 + MALDIALCO3 -> C5DI_MALa | 3e-13*1.0    |
| {541} | C5DIALO2 + EPXDLCO3 -> C5DI_EPX    | 3e-13*1.0    |
| {542} | C5DIALO2 + C3DIALO2 -> C5DI_C3DI   | 3e-13*1.0    |
| {543} | C5DIALO2 + MALDIALO2 -> C5DI_MALb  | 3e-13*1.0    |
| {544} | C5DIALO2 + C6H5O2 -> C5DI_C6a      | 3e-13*1.0    |
| {545} | C5DIALO2 + NBZFUO2 -> C5DI_NBZa    | 3e-13*1.0    |
| {546} | C5DIALO2 + BZFUO2 -> C5DI_BZFU     | 3e-13*1.0    |
| {547} | C5DIALO2 + HCOCOHCOC3 -> C5DI_C3a  | 3e-13*1.0    |
| {548} | C5DIALO2 + CATEC1O2 -> C5DI_CATE   | 3e-13*1.0    |
| {549} | C5DIALO2 + HCOCO3 -> C5DI_C2a      | 3e-13*1.0    |
| {550} | C5DIALO2 + HCOCH2O2 -> C5DI_C2b    | 3e-13*1.0    |
| {551} | C5DIALO2 + NPHEN1O2 -> C5DI_NPHb   | 3e-13*1.0    |
| {552} | C5DIALO2 + NNCATECO2 -> C5DI_NNC   | 6.58e-11*1.0 |
| {553} | C5DIALO2 + NCATECO2 -> C5DI_NCAT   | 2.7e-11*1.0  |
| {554} | C5DIALO2 + NBZQO2 -> C5DI_NBZb     | 3e-13*1.0    |
| {555} | C5DIALO2 + PBZQO2 -> C5DI_PBZ      | 3e-13*1.0    |
| {556} | C5DIALO2 + MALANHYO2 -> C5DI_MALc  | 3e-13*1.0    |
| {557} | C5DIALO2 + NDNPHENO2 -> C5DI_NDN   | 9.08e-11*1.0 |
| {558} | C5DIALO2 + DNPHEO2 -> C5DI_DNP     | 5.2e-11*1.0  |
| {559} | C5DIALO2 + HOCH2CO3 -> C5DI_C2c    | 3e-13*1.0    |
| {560} | C5DIALO2 + C5CO2OHCO3 -> C5DI_C5a  | 3e-13*1.0    |
| {561} | C5DIALO2 + C4CO2DBCO3 -> C5DI_C4a  | 3e-13*1.0    |

## ROOR precursor NPHEO2

|       |                                  |              |
|-------|----------------------------------|--------------|
| {562} | NPHEO2 + NPHEO2 -> NPHa_NPHa     | 9.17e-11*1.0 |
| {563} | NPHEO2 + PHENO2 -> NPHa_PHEN     | 5.29e-11*1.0 |
| {564} | NPHEO2 + MALDIALCO3 -> NPHa_MALa | 1.16e-12*1.0 |
| {565} | NPHEO2 + EPXDLCO3 -> NPHa_EPX    | 1.5e-11*1.0  |
| {566} | NPHEO2 + C3DIALO2 -> NPHa_C3DI   | 3e-13*1.0    |
| {567} | NPHEO2 + MALDIALO2 -> NPHa_MALb  | 1.67e-11*1.0 |
| {568} | NPHEO2 + C6H5O2 -> NPHa_C6a      | 3e-13*1.0    |
| {569} | NPHEO2 + NBZFUO2 -> NPHa_NBZa    | 5.55e-11*1.0 |
| {570} | NPHEO2 + BZFUO2 -> NPHa_BZFU     | 1.67e-11*1.0 |
| {571} | NPHEO2 + HCOCOHCOC3 -> NPHa_C3a  | 4.61e-12*1.0 |
| {572} | NPHEO2 + CATEC1O2 -> NPHa_CATE   | 9.78e-12*1.0 |
| {573} | NPHEO2 + HCOCO3 -> NPHa_C2a      | 3e-13*1.0    |
| {574} | NPHEO2 + HCOCH2O2 -> NPHa_C2b    | 3e-13*1.0    |
| {575} | NPHEO2 + NPHEN1O2 -> NPHa_NPHb   | 3.48e-11*1.0 |
| {576} | NPHEO2 + NNCATECO2 -> NPHa_NNC   | 1e-10*1.0    |
| {577} | NPHEO2 + NCATECO2 -> NPHa_NCAT   | 1e-10*1.0    |
| {578} | NPHEO2 + NBZQO2 -> NPHa_NBZb     | 7.62e-11*1.0 |
| {579} | NPHEO2 + PBZQO2 -> NPHa_PBZ      | 3.74e-11*1.0 |
| {580} | NPHEO2 + MALANHYO2 -> NPHa_MALc  | 2.87e-11*1.0 |
| {581} | NPHEO2 + NDNPHENO2 -> NPHa_NDN   | 1e-10*1.0    |
| {582} | NPHEO2 + DNPHEO2 -> NPHa_DNP     | 1e-10*1.0    |
| {583} | NPHEO2 + HOCH2CO3 -> NPHa_C2c    | 3e-13*1.0    |
| {584} | NPHEO2 + C5CO2OHCO3 -> NPHa_C5a  | 5.12e-11*1.0 |



|                           |                                      |              |
|---------------------------|--------------------------------------|--------------|
| {585}                     | NPHENO2 + C4CO2DBCO3 -> NPHa_C4a     | 2.53e-11*1.0 |
| ROOR precursor PHENO2     |                                      |              |
| {586}                     | PHENO2 + PHENO2 -> PHEN_PHEN         | 1.41e-11*1.0 |
| {587}                     | PHENO2 + MALDIALCO3 -> PHEN_MALa     | 3e-13*1.0    |
| {588}                     | PHENO2 + EPXDLCO3 -> PHEN_EPX        | 3e-13*1.0    |
| {589}                     | PHENO2 + C3DIALO2 -> PHEN_C3DI       | 3e-13*1.0    |
| {590}                     | PHENO2 + MALDIALO2 -> PHEN_MALb      | 3e-13*1.0    |
| {591}                     | PHENO2 + C6H5O2 -> PHEN_C6a          | 3e-13*1.0    |
| {592}                     | PHENO2 + NBZFUO2 -> PHEN_NBZa        | 1.67e-11*1.0 |
| {593}                     | PHENO2 + BZFUO2 -> PHEN_BZFU         | 3e-13*1.0    |
| {594}                     | PHENO2 + HCOCOHCOC3 -> PHEN_C3a      | 3e-13*1.0    |
| {595}                     | PHENO2 + CATEC1O2 -> PHEN_CATE       | 3e-13*1.0    |
| {596}                     | PHENO2 + HCOCOC3 -> PHEN_C2a         | 3e-13*1.0    |
| {597}                     | PHENO2 + HCOCH2O2 -> PHEN_C2b        | 3e-13*1.0    |
| {598}                     | PHENO2 + NPHEN1O2 -> PHEN_NPHb       | 3e-13*1.0    |
| {599}                     | PHENO2 + NNCATECO2 -> PHEN_NNC       | 1e-10*1.0    |
| {600}                     | PHENO2 + NCATECO2 -> PHEN_NCAT       | 6.67e-11*1.0 |
| {601}                     | PHENO2 + NBZQO2 -> PHEN_NBZb         | 3.74e-11*1.0 |
| {602}                     | PHENO2 + PBZQO2 -> PHEN_PBZ          | 3e-13*1.0    |
| {603}                     | PHENO2 + MALANHYO2 -> PHEN_MALc      | 3e-13*1.0    |
| {604}                     | PHENO2 + NDNPHENO2 -> PHEN_NDN       | 1e-10*1.0    |
| {605}                     | PHENO2 + DNPHEO2 -> PHEN_DNP         | 9.17e-11*1.0 |
| {606}                     | PHENO2 + HOCH2CO3 -> PHEN_C2c        | 3e-13*1.0    |
| {607}                     | PHENO2 + C5CO2OHCO3 -> PHEN_C5a      | 1.24e-11*1.0 |
| {608}                     | PHENO2 + C4CO2DBCO3 -> PHEN_C4a      | 3e-13*1.0    |
| ROOR precursor MALDIALCO3 |                                      |              |
| {609}                     | MALDIALCO3 + MALDIALCO3 -> MALa_MALa | 3e-13*1.0    |
| {610}                     | MALDIALCO3 + EPXDLCO3 -> MALa_EPX    | 3e-13*1.0    |
| {611}                     | MALDIALCO3 + C3DIALO2 -> MALa_C3DI   | 3e-13*1.0    |
| {612}                     | MALDIALCO3 + MALDIALO2 -> MALa_MALb  | 3e-13*1.0    |
| {613}                     | MALDIALCO3 + C6H5O2 -> MALa_C6a      | 3e-13*1.0    |
| {614}                     | MALDIALCO3 + NBZFUO2 -> MALa_NBZa    | 3e-13*1.0    |
| {615}                     | MALDIALCO3 + BZFUO2 -> MALa_BZFU     | 3e-13*1.0    |
| {616}                     | MALDIALCO3 + HCOCOHCOC3 -> MALa_C3a  | 3e-13*1.0    |
| {617}                     | MALDIALCO3 + CATEC1O2 -> MALa_CATE   | 3e-13*1.0    |
| {618}                     | MALDIALCO3 + HCOCOC3 -> MALa_C2a     | 3e-13*1.0    |
| {619}                     | MALDIALCO3 + HCOCH2O2 -> MALa_C2b    | 3e-13*1.0    |
| {620}                     | MALDIALCO3 + NPHEN1O2 -> MALa_NPHb   | 3e-13*1.0    |
| {621}                     | MALDIALCO3 + NNCATECO2 -> MALa_NNC   | 5.37e-11*1.0 |
| {622}                     | MALDIALCO3 + NCATECO2 -> MALa_NCAT   | 1.5e-11*1.0  |
| {623}                     | MALDIALCO3 + NBZQO2 -> MALa_NBZb     | 3e-13*1.0    |
| {624}                     | MALDIALCO3 + PBZQO2 -> MALa_PBZ      | 3e-13*1.0    |
| {625}                     | MALDIALCO3 + MALANHYO2 -> MALa_MALc  | 3e-13*1.0    |
| {626}                     | MALDIALCO3 + NDNPHENO2 -> MALa_NDN   | 7.87e-11*1.0 |
| {627}                     | MALDIALCO3 + DNPHEO2 -> MALa_DNP     | 4e-11*1.0    |
| {628}                     | MALDIALCO3 + HOCH2CO3 -> MALa_C2c    | 3e-13*1.0    |
| {629}                     | MALDIALCO3 + C5CO2OHCO3 -> MALa_C5a  | 3e-13*1.0    |
| {630}                     | MALDIALCO3 + C4CO2DBCO3 -> MALa_C4a  | 3e-13*1.0    |
| ROOR precursor EPXDLCO3   |                                      |              |
| {631}                     | EPXDLCO3 + EPXDLCO3 -> EPX_EPX       | 3e-13*1.0    |

|                          |                                    |              |
|--------------------------|------------------------------------|--------------|
| {632}                    | EPXDLCO3 + C3DIALO2 -> EPX_C3DI    | 3e-13*1.0    |
| {633}                    | EPXDLCO3 + MALDIALO2 -> EPX_MALb   | 3e-13*1.0    |
| {634}                    | EPXDLCO3 + C6H5O2 -> EPX_C6a       | 3e-13*1.0    |
| {635}                    | EPXDLCO3 + NBZFUO2 -> EPX_NBZa     | 3e-13*1.0    |
| {636}                    | EPXDLCO3 + BZFUO2 -> EPX_BZFU      | 3e-13*1.0    |
| {637}                    | EPXDLCO3 + HCOCO3 -> EPX_C3a       | 3e-13*1.0    |
| {638}                    | EPXDLCO3 + CATEC1O2 -> EPX_CATE    | 3e-13*1.0    |
| {639}                    | EPXDLCO3 + HCOCO3 -> EPX_C2a       | 3e-13*1.0    |
| {640}                    | EPXDLCO3 + HCOCH2O2 -> EPX_C2b     | 3e-13*1.0    |
| {641}                    | EPXDLCO3 + NPHEN1O2 -> EPX_NPHb    | 3e-13*1.0    |
| {642}                    | EPXDLCO3 + NNCATECO2 -> EPX_NNC    | 6.75e-11*1.0 |
| {643}                    | EPXDLCO3 + NCATECO2 -> EPX_NCAT    | 2.87e-11*1.0 |
| {644}                    | EPXDLCO3 + NBZQO2 -> EPX_NBZb      | 3e-13*1.0    |
| {645}                    | EPXDLCO3 + PBZQO2 -> EPX_PBZ       | 3e-13*1.0    |
| {646}                    | EPXDLCO3 + MALANHYO2 -> EPX_MALc   | 3e-13*1.0    |
| {647}                    | EPXDLCO3 + NDNPHENO2 -> EPX_NDN    | 9.25e-11*1.0 |
| {648}                    | EPXDLCO3 + DNPHEO2 -> EPX_DNP      | 5.37e-11*1.0 |
| {649}                    | EPXDLCO3 + HOCH2CO3 -> EPX_C2c     | 3e-13*1.0    |
| {650}                    | EPXDLCO3 + C5CO2OHCO3 -> EPX_C5a   | 3e-13*1.0    |
| {651}                    | EPXDLCO3 + C4CO2DBCO3 -> EPX_C4a   | 3e-13*1.0    |
| ROOR precursor C3DIALO2  |                                    |              |
| {652}                    | C3DIALO2 + C3DIALO2 -> C3DI_C3DI   | 3e-13*1.0    |
| {653}                    | C3DIALO2 + MALDIALO2 -> C3DI_MALb  | 3e-13*1.0    |
| {654}                    | C3DIALO2 + C6H5O2 -> C3DI_C6a      | 3e-13*1.0    |
| {655}                    | C3DIALO2 + NBZFUO2 -> C3DI_NBZa    | 3e-13*1.0    |
| {656}                    | C3DIALO2 + BZFUO2 -> C3DI_BZFU     | 3e-13*1.0    |
| {657}                    | C3DIALO2 + HCOCO3 -> C3DI_C3a      | 3e-13*1.0    |
| {658}                    | C3DIALO2 + CATEC1O2 -> C3DI_CATE   | 3e-13*1.0    |
| {659}                    | C3DIALO2 + HCOCO3 -> C3DI_C2a      | 3e-13*1.0    |
| {660}                    | C3DIALO2 + HCOCH2O2 -> C3DI_C2b    | 3e-13*1.0    |
| {661}                    | C3DIALO2 + NPHEN1O2 -> C3DI_NPHb   | 3e-13*1.0    |
| {662}                    | C3DIALO2 + NNCATECO2 -> C3DI_NNC   | 4.34e-11*1.0 |
| {663}                    | C3DIALO2 + NCATECO2 -> C3DI_NCAT   | 4.61e-12*1.0 |
| {664}                    | C3DIALO2 + NBZQO2 -> C3DI_NBZb     | 3e-13*1.0    |
| {665}                    | C3DIALO2 + PBZQO2 -> C3DI_PBZ      | 3e-13*1.0    |
| {666}                    | C3DIALO2 + MALANHYO2 -> C3DI_MALc  | 3e-13*1.0    |
| {667}                    | C3DIALO2 + NDNPHENO2 -> C3DI_NDN   | 6.84e-11*1.0 |
| {668}                    | C3DIALO2 + DNPHEO2 -> C3DI_DNP     | 2.96e-11*1.0 |
| {669}                    | C3DIALO2 + HOCH2CO3 -> C3DI_C2c    | 3e-13*1.0    |
| {670}                    | C3DIALO2 + C5CO2OHCO3 -> C3DI_C5a  | 3e-13*1.0    |
| {671}                    | C3DIALO2 + C4CO2DBCO3 -> C3DI_C4a  | 3e-13*1.0    |
| ROOR precursor MALDIALO2 |                                    |              |
| {672}                    | MALDIALO2 + MALDIALO2 -> MALb_MALb | 3e-13*1.0    |
| {673}                    | MALDIALO2 + C6H5O2 -> MALb_C6a     | 3e-13*1.0    |
| {674}                    | MALDIALO2 + NBZFUO2 -> MALb_NBZa   | 3e-13*1.0    |
| {675}                    | MALDIALO2 + BZFUO2 -> MALb_BZFU    | 3e-13*1.0    |
| {676}                    | MALDIALO2 + HCOCO3 -> MALb_C3a     | 3e-13*1.0    |
| {677}                    | MALDIALO2 + CATEC1O2 -> MALb_CATE  | 3e-13*1.0    |
| {678}                    | MALDIALO2 + HCOCO3 -> MALb_C2a     | 3e-13*1.0    |
| {679}                    | MALDIALO2 + HCOCH2O2 -> MALb_C2b   | 3e-13*1.0    |

|       |                                    |              |
|-------|------------------------------------|--------------|
| {680} | MALDIALO2 + NPHEN1O2 -> MALb_NPHb  | 3e-13*1.0    |
| {681} | MALDIALO2 + NNCATECO2 -> MALb_NNC  | 6.93e-11*1.0 |
| {682} | MALDIALO2 + NCATECO2 -> MALb_NCAT  | 3.05e-11*1.0 |
| {683} | MALDIALO2 + NBZQO2 -> MALb_NBZb    | 1.16e-12*1.0 |
| {684} | MALDIALO2 + PBZQO2 -> MALb_PBZ     | 3e-13*1.0    |
| {685} | MALDIALO2 + MALANHYO2 -> MALb_MALc | 3e-13*1.0    |
| {686} | MALDIALO2 + NDNPHENO2 -> MALb_NDN  | 9.43e-11*1.0 |
| {687} | MALDIALO2 + DNPHEO2 -> MALb_DNP    | 5.55e-11*1.0 |
| {688} | MALDIALO2 + HOCH2CO3 -> MALb_C2c   | 3e-13*1.0    |
| {689} | MALDIALO2 + C5CO2OHCO3 -> MALb_C5a | 3e-13*1.0    |
| {690} | MALDIALO2 + C4CO2DBCO3 -> MALb_C4a | 3e-13*1.0    |

ROOR precursor C6H5O2

|       |                                |              |
|-------|--------------------------------|--------------|
| {691} | C6H5O2 + C6H5O2 -> C6a_C6a     | 3e-13*1.0    |
| {692} | C6H5O2 + NBZFUO2 -> C6a_NBZa   | 3e-13*1.0    |
| {693} | C6H5O2 + BZFUO2 -> C6a_BZFU    | 3e-13*1.0    |
| {694} | C6H5O2 + HCOCOHCO3 -> C6a_C3a  | 3e-13*1.0    |
| {695} | C6H5O2 + CATEC1O2 -> C6a_CATE  | 3e-13*1.0    |
| {696} | C6H5O2 + HCOCO3 -> C6a_C2a     | 3e-13*1.0    |
| {697} | C6H5O2 + HCOCH2O2 -> C6a_C2b   | 3e-13*1.0    |
| {698} | C6H5O2 + NPHEN1O2 -> C6a_NPHb  | 3e-13*1.0    |
| {699} | C6H5O2 + NNCATECO2 -> C6a_NNC  | 4.86e-11*1.0 |
| {700} | C6H5O2 + NCATECO2 -> C6a_NCAT  | 9.78e-12*1.0 |
| {701} | C6H5O2 + NBZQO2 -> C6a_NBZb    | 3e-13*1.0    |
| {702} | C6H5O2 + PBZQO2 -> C6a_PBZ     | 3e-13*1.0    |
| {703} | C6H5O2 + MALANHYO2 -> C6a_MALc | 3e-13*1.0    |
| {704} | C6H5O2 + NDNPHENO2 -> C6a_NDN  | 7.36e-11*1.0 |
| {705} | C6H5O2 + DNPHEO2 -> C6a_DNP    | 3.48e-11*1.0 |
| {706} | C6H5O2 + HOCH2CO3 -> C6a_C2c   | 3e-13*1.0    |
| {707} | C6H5O2 + C5CO2OHCO3 -> C6a_C5a | 3e-13*1.0    |
| {708} | C6H5O2 + C4CO2DBCO3 -> C6a_C4a | 3e-13*1.0    |

ROOR precursor NBZFUO2

|       |                                  |              |
|-------|----------------------------------|--------------|
| {709} | NBZFUO2 + NBZFUO2 -> NBZa_NBZa   | 1.93e-11*1.0 |
| {710} | NBZFUO2 + BZFUO2 -> NBZa_BZFU    | 3e-13*1.0    |
| {711} | NBZFUO2 + HCOCOHCO3 -> NBZa_C3a  | 3e-13*1.0    |
| {712} | NBZFUO2 + CATEC1O2 -> NBZa_CATE  | 3e-13*1.0    |
| {713} | NBZFUO2 + HCOCO3 -> NBZa_C2a     | 3e-13*1.0    |
| {714} | NBZFUO2 + HCOCH2O2 -> NBZa_C2b   | 3e-13*1.0    |
| {715} | NBZFUO2 + NPHEN1O2 -> NBZa_NPHb  | 3e-13*1.0    |
| {716} | NBZFUO2 + NNCATECO2 -> NBZa_NNC  | 1e-10*1.0    |
| {717} | NBZFUO2 + NCATECO2 -> NBZa_NCAT  | 6.93e-11*1.0 |
| {718} | NBZFUO2 + NBZQO2 -> NBZa_NBZb    | 4e-11*1.0    |
| {719} | NBZFUO2 + PBZQO2 -> NBZa_PBZ     | 1.16e-12*1.0 |
| {720} | NBZFUO2 + MALANHYO2 -> NBZa_MALc | 3e-13*1.0    |
| {721} | NBZFUO2 + NDNPHENO2 -> NBZa_NDN  | 1e-10*1.0    |
| {722} | NBZFUO2 + DNPHEO2 -> NBZa_DNP    | 9.43e-11*1.0 |
| {723} | NBZFUO2 + HOCH2CO3 -> NBZa_C2c   | 3e-13*1.0    |
| {724} | NBZFUO2 + C5CO2OHCO3 -> NBZa_C5a | 1.5e-11*1.0  |
| {725} | NBZFUO2 + C4CO2DBCO3 -> NBZa_C4a | 3e-13*1.0    |

ROOR precursor BZFUO2

|       |                              |           |
|-------|------------------------------|-----------|
| {726} | BZFUO2 + BZFUO2 -> BZFU_BZFU | 3e-13*1.0 |
|-------|------------------------------|-----------|

|                           |                                    |              |
|---------------------------|------------------------------------|--------------|
| {727}                     | BZFUO2 + HCOCOHCOC3 -> BZFU_C3a    | 3e-13*1.0    |
| {728}                     | BZFUO2 + CATEC1O2 -> BZFU_CATE     | 3e-13*1.0    |
| {729}                     | BZFUO2 + HCOCO3 -> BZFU_C2a        | 3e-13*1.0    |
| {730}                     | BZFUO2 + HCOCH2O2 -> BZFU_C2b      | 3e-13*1.0    |
| {731}                     | BZFUO2 + NPHEN1O2 -> BZFU_NPHb     | 3e-13*1.0    |
| {732}                     | BZFUO2 + NNCATECO2 -> BZFU_NNC     | 6.93e-11*1.0 |
| {733}                     | BZFUO2 + NCATECO2 -> BZFU_NCAT     | 3.05e-11*1.0 |
| {734}                     | BZFUO2 + NBZQO2 -> BZFU_NBZb       | 1.16e-12*1.0 |
| {735}                     | BZFUO2 + PBZQO2 -> BZFU_PBZ        | 3e-13*1.0    |
| {736}                     | BZFUO2 + MALANHYO2 -> BZFU_MALc    | 3e-13*1.0    |
| {737}                     | BZFUO2 + NDNPHENO2 -> BZFU_NDN     | 9.43e-11*1.0 |
| {738}                     | BZFUO2 + DNPHEO2 -> BZFU_DNP       | 5.55e-11*1.0 |
| {739}                     | BZFUO2 + HOCH2CO3 -> BZFU_C2c      | 3e-13*1.0    |
| {740}                     | BZFUO2 + C5CO2OHCO3 -> BZFU_C5a    | 3e-13*1.0    |
| {741}                     | BZFUO2 + C4CO2DBCO3 -> BZFU_C4a    | 3e-13*1.0    |
| ROOR precursor HCOCOHCOC3 |                                    |              |
| {742}                     | HCOCOHCOC3 + HCOCOHCOC3 -> C3a_C3a | 3e-13*1.0    |
| {743}                     | HCOCOHCOC3 + CATEC1O2 -> C3a_CATE  | 3e-13*1.0    |
| {744}                     | HCOCOHCOC3 + HCOCO3 -> C3a_C2a     | 3e-13*1.0    |
| {745}                     | HCOCOHCOC3 + HCOCH2O2 -> C3a_C2b   | 3e-13*1.0    |
| {746}                     | HCOCOHCOC3 + NPHEN1O2 -> C3a_NPHb  | 3e-13*1.0    |
| {747}                     | HCOCOHCOC3 + NNCATECO2 -> C3a_NNC  | 5.72e-11*1.0 |
| {748}                     | HCOCOHCOC3 + NCATECO2 -> C3a_NCAT  | 1.84e-11*1.0 |
| {749}                     | HCOCOHCOC3 + NBZQO2 -> C3a_NBZb    | 3e-13*1.0    |
| {750}                     | HCOCOHCOC3 + PBZQO2 -> C3a_PBZ     | 3e-13*1.0    |
| {751}                     | HCOCOHCOC3 + MALANHYO2 -> C3a_MALc | 3e-13*1.0    |
| {752}                     | HCOCOHCOC3 + NDNPHENO2 -> C3a_NDN  | 8.22e-11*1.0 |
| {753}                     | HCOCOHCOC3 + DNPHEO2 -> C3a_DNP    | 4.34e-11*1.0 |
| {754}                     | HCOCOHCOC3 + HOCH2CO3 -> C3a_C2c   | 3e-13*1.0    |
| {755}                     | HCOCOHCOC3 + C5CO2OHCO3 -> C3a_C5a | 3e-13*1.0    |
| {756}                     | HCOCOHCOC3 + C4CO2DBCO3 -> C3a_C4a | 3e-13*1.0    |
| ROOR precursor CATEC1O2   |                                    |              |
| {757}                     | CATEC1O2 + CATEC1O2 -> CATE_CATE   | 3e-13*1.0    |
| {758}                     | CATEC1O2 + HCOCO3 -> CATE_C2a      | 3e-13*1.0    |
| {759}                     | CATEC1O2 + HCOCH2O2 -> CATE_C2b    | 3e-13*1.0    |
| {760}                     | CATEC1O2 + NPHEN1O2 -> CATE_NPHb   | 3e-13*1.0    |
| {761}                     | CATEC1O2 + NNCATECO2 -> CATE_NNC   | 6.24e-11*1.0 |
| {762}                     | CATEC1O2 + NCATECO2 -> CATE_NCAT   | 2.36e-11*1.0 |
| {763}                     | CATEC1O2 + NBZQO2 -> CATE_NBZb     | 3e-13*1.0    |
| {764}                     | CATEC1O2 + PBZQO2 -> CATE_PBZ      | 3e-13*1.0    |
| {765}                     | CATEC1O2 + MALANHYO2 -> CATE_MALc  | 3e-13*1.0    |
| {766}                     | CATEC1O2 + NDNPHENO2 -> CATE_NDN   | 8.74e-11*1.0 |
| {767}                     | CATEC1O2 + DNPHEO2 -> CATE_DNP     | 4.86e-11*1.0 |
| {768}                     | CATEC1O2 + HOCH2CO3 -> CATE_C2c    | 3e-13*1.0    |
| {769}                     | CATEC1O2 + C5CO2OHCO3 -> CATE_C5a  | 3e-13*1.0    |
| {770}                     | CATEC1O2 + C4CO2DBCO3 -> CATE_C4a  | 3e-13*1.0    |
| ROOR precursor HCOCO3     |                                    |              |
| {771}                     | HCOCO3 + HCOCO3 -> C2a_C2a         | 3e-13*1.0    |
| {772}                     | HCOCO3 + HCOCH2O2 -> C2a_C2b       | 3e-13*1.0    |
| {773}                     | HCOCO3 + NPHEN1O2 -> C2a_NPHb      | 3e-13*1.0    |

|                          |                                   |              |
|--------------------------|-----------------------------------|--------------|
| {774}                    | HCOCO3 + NNCATECO2 -> C2a_NNC     | 3.13e-11*1.0 |
| {775}                    | HCOCO3 + NCATECO2 -> C2a_NCAT     | 3e-13*1.0    |
| {776}                    | HCOCO3 + NBZQO2 -> C2a_NBZb       | 3e-13*1.0    |
| {777}                    | HCOCO3 + PBZQO2 -> C2a_PBZ        | 3e-13*1.0    |
| {778}                    | HCOCO3 + MALANHYO2 -> C2a_MALc    | 3e-13*1.0    |
| {779}                    | HCOCO3 + NDNPHENO2 -> C2a_NDN     | 5.63e-11*1.0 |
| {780}                    | HCOCO3 + DNPHEO2 -> C2a_DNP       | 1.75e-11*1.0 |
| {781}                    | HCOCO3 + HOCH2CO3 -> C2a_C2c      | 3e-13*1.0    |
| {782}                    | HCOCO3 + C5CO2OHCO3 -> C2a_C5a    | 3e-13*1.0    |
| {783}                    | HCOCO3 + C4CO2DBCO3 -> C2a_C4a    | 3e-13*1.0    |
| ROOR precursor HCOCH2O2  |                                   |              |
| {784}                    | HCOCH2O2 + HCOCH2O2 -> C2b_C2b    | 3e-13*1.0    |
| {785}                    | HCOCH2O2 + NPHEO2 -> C2b_NPHb     | 3e-13*1.0    |
| {786}                    | HCOCH2O2 + NNCATECO2 -> C2b_NNC   | 1.93e-11*1.0 |
| {787}                    | HCOCH2O2 + NCATECO2 -> C2b_NCAT   | 3e-13*1.0    |
| {788}                    | HCOCH2O2 + NBZQO2 -> C2b_NBZb     | 3e-13*1.0    |
| {789}                    | HCOCH2O2 + PBZQO2 -> C2b_PBZ      | 3e-13*1.0    |
| {790}                    | HCOCH2O2 + MALANHYO2 -> C2b_MALc  | 3e-13*1.0    |
| {791}                    | HCOCH2O2 + NDNPHENO2 -> C2b_NDN   | 4.43e-11*1.0 |
| {792}                    | HCOCH2O2 + DNPHEO2 -> C2b_DNP     | 5.47e-12*1.0 |
| {793}                    | HCOCH2O2 + HOCH2CO3 -> C2b_C2c    | 3e-13*1.0    |
| {794}                    | HCOCH2O2 + C5CO2OHCO3 -> C2b_C5a  | 3e-13*1.0    |
| {795}                    | HCOCH2O2 + C4CO2DBCO3 -> C2b_C4a  | 3e-13*1.0    |
| ROOR precursor NPHEO2    |                                   |              |
| {796}                    | NPHEO2 + NPHEO2 -> NPHb_NPHb      | 3e-13*1.0    |
| {797}                    | NPHEO2 + NNCATECO2 -> NPHb_NNC    | 8.74e-11*1.0 |
| {798}                    | NPHEO2 + NCATECO2 -> NPHb_NCAT    | 4.86e-11*1.0 |
| {799}                    | NPHEO2 + NBZQO2 -> NPHb_NBZb      | 1.93e-11*1.0 |
| {800}                    | NPHEO2 + PBZQO2 -> NPHb_PBZ       | 3e-13*1.0    |
| {801}                    | NPHEO2 + MALANHYO2 -> NPHb_MALc   | 3e-13*1.0    |
| {802}                    | NPHEO2 + NDNPHENO2 -> NPHb_NDN    | 1e-10*1.0    |
| {803}                    | NPHEO2 + DNPHEO2 -> NPHb_DNP      | 7.36e-11*1.0 |
| {804}                    | NPHEO2 + HOCH2CO3 -> NPHb_C2c     | 3e-13*1.0    |
| {805}                    | NPHEO2 + C5CO2OHCO3 -> NPHb_C5a   | 3e-13*1.0    |
| {806}                    | NPHEO2 + C4CO2DBCO3 -> NPHb_C4a   | 3e-13*1.0    |
| ROOR precursor NNCATECO2 |                                   |              |
| {807}                    | NNCATECO2 + NNCATECO2 -> NNC_NNC  | 1e-10*1.0    |
| {808}                    | NNCATECO2 + NCATECO2 -> NNC_NCAT  | 1e-10*1.0    |
| {809}                    | NNCATECO2 + NBZQO2 -> NNC_NBZb    | 1e-10*1.0    |
| {810}                    | NNCATECO2 + PBZQO2 -> NNC_PBZ     | 9e-11*1.0    |
| {811}                    | NNCATECO2 + MALANHYO2 -> NNC_MALc | 8.13e-11*1.0 |
| {812}                    | NNCATECO2 + NDNPHENO2 -> NNC_NDN  | 1e-10*1.0    |
| {813}                    | NNCATECO2 + DNPHEO2 -> NNC_DNP    | 1e-10*1.0    |
| {814}                    | NNCATECO2 + HOCH2CO3 -> NNC_C2c   | 3.31e-11*1.0 |
| {815}                    | NNCATECO2 + C5CO2OHCO3 -> NNC_C5a | 1e-10*1.0    |
| {816}                    | NNCATECO2 + C4CO2DBCO3 -> NNC_C4a | 7.79e-11*1.0 |
| ROOR precursor NCATECO2  |                                   |              |
| {817}                    | NCATECO2 + NCATECO2 -> NCAT_NCAT  | 1e-10*1.0    |
| {818}                    | NCATECO2 + NBZQO2 -> NCAT_NBZb    | 9e-11*1.0    |
| {819}                    | NCATECO2 + PBZQO2 -> NCAT_PBZ     | 5.12e-11*1.0 |

|                           |                                    |              |
|---------------------------|------------------------------------|--------------|
| {820}                     | NCATECO2 + MALANHYO2 -> NCAT_MALc  | 4.25e-11*1.0 |
| {821}                     | NCATECO2 + NDNPHENO2 -> NCAT_NDN   | 1e-10*1.0    |
| {822}                     | NCATECO2 + DNPHEO2 -> NCAT_DNP     | 1e-10*1.0    |
| {823}                     | NCATECO2 + HOCH2CO3 -> NCAT_C2c    | 3e-13*1.0    |
| {824}                     | NCATECO2 + C5CO2OHCO3 -> NCAT_C5a  | 6.5e-11*1.0  |
| {825}                     | NCATECO2 + C4CO2DBCO3 -> NCAT_C4a  | 3.91e-11*1.0 |
| ROOR precursor NBZQO2     |                                    |              |
| {826}                     | NBZQO2 + NBZQO2 -> NBZb_NBZb       | 6.06e-11*1.0 |
| {827}                     | NBZQO2 + PBZQO2 -> NBZb_PBZ        | 2.19e-11*1.0 |
| {828}                     | NBZQO2 + MALANHYO2 -> NBZb_MALc    | 1.32e-11*1.0 |
| {829}                     | NBZQO2 + NDNPHENO2 -> NBZb_NDN     | 1e-10*1.0    |
| {830}                     | NBZQO2 + DNPHEO2 -> NBZb_DNP       | 1e-10*1.0    |
| {831}                     | NBZQO2 + HOCH2CO3 -> NBZb_C2c      | 3e-13*1.0    |
| {832}                     | NBZQO2 + C5CO2OHCO3 -> NBZb_C5a    | 3.56e-11*1.0 |
| {833}                     | NBZQO2 + C4CO2DBCO3 -> NBZb_C4a    | 9.78e-12*1.0 |
| ROOR precursor PBZQO2     |                                    |              |
| {834}                     | PBZQO2 + PBZQO2 -> PBZ_PBZ         | 3e-13*1.0    |
| {835}                     | PBZQO2 + MALANHYO2 -> PBZ_MALc     | 3e-13*1.0    |
| {836}                     | PBZQO2 + NDNPHENO2 -> PBZ_NDN      | 1e-10*1.0    |
| {837}                     | PBZQO2 + DNPHEO2 -> PBZ_DNP        | 7.62e-11*1.0 |
| {838}                     | PBZQO2 + HOCH2CO3 -> PBZ_C2c       | 3e-13*1.0    |
| {839}                     | PBZQO2 + C5CO2OHCO3 -> PBZ_C5a     | 3e-13*1.0    |
| {840}                     | PBZQO2 + C4CO2DBCO3 -> PBZ_C4a     | 3e-13*1.0    |
| ROOR precursor MALANHYO2  |                                    |              |
| {841}                     | MALANHYO2 + MALANHYO2 -> MALc_MALc | 3e-13*1.0    |
| {842}                     | MALANHYO2 + NDNPHENO2 -> MALc_NDN  | 1e-10*1.0    |
| {843}                     | MALANHYO2 + DNPHEO2 -> MALc_DNP    | 6.75e-11*1.0 |
| {844}                     | MALANHYO2 + HOCH2CO3 -> MALc_C2c   | 3e-13*1.0    |
| {845}                     | MALANHYO2 + C5CO2OHCO3 -> MALc_C5a | 3e-13*1.0    |
| {846}                     | MALANHYO2 + C4CO2DBCO3 -> MALc_C4a | 3e-13*1.0    |
| ROOR precursor NDNPHENO2  |                                    |              |
| {847}                     | NDNPHENO2 + NDNPHENO2 -> NDN_NDN   | 1e-10*1.0    |
| {848}                     | NDNPHENO2 + DNPHEO2 -> NDN_DNP     | 1e-10*1.0    |
| {849}                     | NDNPHENO2 + HOCH2CO3 -> NDN_C2c    | 5.81e-11*1.0 |
| {850}                     | NDNPHENO2 + C5CO2OHCO3 -> NDN_C5a  | 1e-10*1.0    |
| {851}                     | NDNPHENO2 + C4CO2DBCO3 -> NDN_C4a  | 1e-10*1.0    |
| ROOR precursor DNPHEO2    |                                    |              |
| {852}                     | DNPHEO2 + DNPHEO2 -> DNP_DNP       | 1e-10*1.0    |
| {853}                     | DNPHEO2 + HOCH2CO3 -> DNP_C2c      | 1.93e-11*1.0 |
| {854}                     | DNPHEO2 + C5CO2OHCO3 -> DNP_C5a    | 9e-11*1.0    |
| {855}                     | DNPHEO2 + C4CO2DBCO3 -> DNP_C4a    | 6.41e-11*1.0 |
| ROOR precursor HOCH2CO3   |                                    |              |
| {856}                     | HOCH2CO3 + HOCH2CO3 -> C2c_C2c     | 3e-13*1.0    |
| {857}                     | HOCH2CO3 + C5CO2OHCO3 -> C2c_C5a   | 3e-13*1.0    |
| {858}                     | HOCH2CO3 + C4CO2DBCO3 -> C2c_C4a   | 3e-13*1.0    |
| ROOR precursor C5CO2OHCO3 |                                    |              |
| {859}                     | C5CO2OHCO3 + C5CO2OHCO3 -> C5a_C5a | 1.06e-11*1.0 |
| {860}                     | C5CO2OHCO3 + C4CO2DBCO3 -> C5a_C4a | 3e-13*1.0    |
| ROOR precursor C4CO2DBCO3 |                                    |              |
| {861}                     | C4CO2DBCO3 + C4CO2DBCO3 -> C4a_C4a | 3e-13*1.0    |

### Reaction (R5c)

Peroxy radical reacting with pool of RO<sub>2</sub>s forming ROH by O removal and H addition:

|       |                             |                       |
|-------|-----------------------------|-----------------------|
| {862} | BZo_RO2_O7 -> BZo_O4_2OH    | RO2*2.62e-11*0.21*0.4 |
| {863} | BZo_RO2_O9 -> BZo_O6_2OH    | RO2*5.38e-11*0.21*0.4 |
| {864} | BZo_RO2_O11 -> BZo_O8_2OH   | RO2*8.14e-11*0.21*0.4 |
| {865} | BZeo_RO2_O6 -> BZeo_O3_2OH  | RO2*1.24e-11*0.21*0.4 |
| {866} | BZeo_RO2_O8 -> BZeo_O5_2OH  | RO2*4e-11*0.21*0.4    |
| {867} | BZeo_RO2_O10 -> BZeo_O7_2OH | RO2*6.76e-11*0.21*0.4 |
| {868} | C5_RO2_O6 -> C5e_O3_2OH     | RO2*2.97e-11*0.21*0.4 |
| {869} | C5_RO2_O7 -> C5_O4_2OH      | RO2*4.34e-11*0.21*0.4 |
| {870} | C5_RO2_O8 -> C5e_O5_2OH     | RO2*5.72e-11*0.21*0.4 |
| {871} | C5_RO2_O9 -> C5_O6_2OH      | RO2*7.1e-11*0.21*0.4  |
| {872} | C5_RO2_O10 -> C5e_O7_2OH    | RO2*8.48e-11*0.21*0.4 |

### Reaction (R5d)

Peroxy radical reacting with pool of RO<sub>2</sub>s forming R=O by OH removal:

|       |                           |                      |
|-------|---------------------------|----------------------|
| {873} | BZo_RO2_O7 -> BZo_O5_O    | RO2*2.62e-11*0.2*0.4 |
| {874} | BZo_RO2_O9 -> BZo_O7_O    | RO2*5.38e-11*0.2*0.4 |
| {875} | BZo_RO2_O11 -> BZo_O9_O   | RO2*8.14e-11*0.2*0.4 |
| {876} | BZeo_RO2_O6 -> BZeo_O4_O  | RO2*1.24e-11*0.2*0.4 |
| {877} | BZeo_RO2_O8 -> BZeo_O6_O  | RO2*4e-11*0.2*0.4    |
| {878} | BZeo_RO2_O10 -> BZeo_O8_O | RO2*6.76e-11*0.2*0.4 |
| {879} | C5_RO2_O6 -> C5e_O4_O     | RO2*2.97e-11*0.2*0.4 |
| {880} | C5_RO2_O7 -> C5_O5_O      | RO2*4.34e-11*0.2*0.4 |
| {881} | C5_RO2_O8 -> C5e_O6_O     | RO2*5.72e-11*0.2*0.4 |
| {882} | C5_RO2_O9 -> C5_O7_O      | RO2*7.1e-11*0.2*0.4  |
| {883} | C5_RO2_O10 -> C5e_O8_O    | RO2*8.48e-11*0.2*0.4 |

### Reaction (R6)

Fragmentation of alkoxy radicals

|       |                                      |           |
|-------|--------------------------------------|-----------|
| {884} | BZo2_RO_O6 -> GLYOX + MALDIAL + HO2  | KDEC*0.05 |
| {885} | BZo2_RO_O8 -> GLYOX + MALDIAL + HO2  | KDEC*0.05 |
| {886} | BZo2_RO_O10 -> GLYOX + MALDIAL + HO2 | KDEC*0.05 |
| {887} | BZeo2_RO_O5 -> GLYOX + MALDIAL + HO2 | KDEC*0.05 |
| {888} | BZeo2_RO_O7 -> GLYOX + MALDIAL + HO2 | KDEC*0.05 |
| {889} | BZeo2_RO_O9 -> GLYOX + MALDIAL + HO2 | KDEC*0.05 |
| {890} | BZo_RO_O6 -> GLYOX + MALDIAL + HO2   | KDEC*0.8  |
| {891} | BZo_RO_O8 -> GLYOX + MALDIAL + HO2   | KDEC*0.88 |
| {892} | BZo_RO_O10 -> GLYOX + MALDIAL + HO2  | KDEC*0.43 |
| {893} | BZeo_RO_O5 -> GLYOX + MALDIAL + HO2  | KDEC*0.1  |
| {894} | BZeo_RO_O7 -> GLYOX + MALDIAL + HO2  | KDEC*0.64 |
| {895} | BZeo_RO_O9 -> GLYOX + MALDIAL + HO2  | KDEC*0.1  |
| {896} | C5_RO_O5 -> MALDIAL + CO + HO2       | KDEC*0.05 |
| {897} | C5_RO_O6 -> MALDIAL + CO + HO2       | KDEC*0.05 |
| {898} | C5_RO_O7 -> MALDIAL + CO + HO2       | KDEC*0.05 |
| {899} | C5_RO_O8 -> MALDIAL + CO + HO2       | KDEC*0.05 |
| {900} | C5_RO_O9 -> MALDIAL + CO + HO2       | KDEC*0.05 |

### Reaction (R7)

Closed shell formation from RO<sub>2</sub> via H-shift from alpha-hydro(per)oxyl position: RO<sub>2</sub> -> RC=O

|       |                                    |      |      |
|-------|------------------------------------|------|------|
| {901} | BZo_RO2_O7 -> BZouni_O6_O + OH     | 0.01 |      |
| {902} | BZo_RO2_O9 -> BZouni_O8_O + OH     | 0.01 |      |
| {903} | BZo_RO2_O11 -> BZouni_O10_O + OH   |      | 0.01 |
| {904} | BZeo_RO2_O6 -> BZeouni_O5_O + HO2  |      | 0.01 |
| {905} | BZeo_RO2_O8 -> BZeouni_O7_O + HO2  |      | 0.01 |
| {906} | BZeo_RO2_O10 -> BZeouni_O9_O + HO2 |      | 0.01 |
| {907} | C5_RO2_O6 -> C5euni_O5_O + OH      | 0.3  |      |
| {908} | C5_RO2_O7 -> C5uni_O6_O + OH       | 0.8  |      |
| {909} | C5_RO2_O8 -> C5euni_O7_O + OH      | 0.8  |      |
| {910} | C5_RO2_O9 -> C5uni_O8_O + HO2      | 0.01 |      |
| {911} | C5_RO2_O10 -> C5euni_O9_O + HO2    |      | 0.01 |

#### Reaction (R8)

Closed shell formation from RO via H-shift from alpha-hydro(per)oxyl position: RO → RC=O

|       |                                |            |           |
|-------|--------------------------------|------------|-----------|
| {912} | BZo2_RO_O6 -> ROCS_O5_O + HO2  | KDEC*0.05  |           |
| {913} | BZo2_RO_O8 -> ROCS_O7_O + HO2  | KDEC*0.10  |           |
| {914} | BZo2_RO_O10 -> ROCS_O9_O + HO2 |            | KDEC*0.60 |
| {915} | BZo2_RO_O10 -> ROCS_O8_O + HO2 |            | KDEC*0.35 |
| {916} | BZeo2_RO_O5 -> ROCS_O4_O + HO2 |            | KDEC*0.05 |
| {917} | BZeo2_RO_O7 -> ROCS_O6_O + HO2 |            | KDEC*0.05 |
| {918} | BZeo2_RO_O9 -> ROCS_O8_O + HO2 |            | KDEC*0.55 |
| {919} | BZo_RO_O6 -> ROCS_O5_O + HO2   | KDEC*0.004 |           |
| {920} | BZo_RO_O8 -> ROCS_O7_O + HO2   | KDEC*0.001 |           |
| {921} | BZo_RO_O10 -> ROCS_O9_O + HO2  | KDEC*0.02  |           |
| {922} | BZeo_RO_O5 -> ROCS_O4_O + HO2  | KDEC*0.45  |           |
| {923} | BZeo_RO_O7 -> ROCS_O6_O + HO2  | KDEC*0.007 |           |
| {924} | BZeo_RO_O9 -> ROCS_O8_O + HO2  | KDEC*0.45  |           |
| {925} | C5_RO_O5 -> C5e_O4_O + HO2     | KDEC*0.05  |           |
| {926} | C5_RO_O6 -> C5_O5_O + HO2      | KDEC*0.05  |           |
| {927} | C5_RO_O7 -> C5e_O6_O + HO2     | KDEC*0.10  |           |
| {928} | C5_RO_O8 -> C5_O7_O + HO2      | KDEC*0.25  |           |
| {929} | C5_RO_O9 -> C5e_O8_O + HO2     | KDEC*0.50  |           |
| {930} | C5_RO_O9 -> C5_O7_O + HO2      | KDEC*0.45  |           |

#### Reaction (R9)

Peroxy radical undergoing H-shift and forming carbonyl radical (RC=O\*)

RC=O\* eliminates CO and adding O<sub>2</sub> to form C5RO2

|       |                               |       |  |
|-------|-------------------------------|-------|--|
| {931} | BZo_RO2_O7 -> C5_RO2_O8 + CO  | 0.6   |  |
| {932} | BZo_RO2_O9 -> C5_RO2_O10 + CO | 0.014 |  |
| {933} | BZeo_RO2_O6 -> C5_RO2_O7 + CO | 0.8   |  |
| {934} | BZeo_RO2_O8 -> C5_RO2_O9 + CO | 0.06  |  |



## References (SI-text)

- Compernolle, S., Ceulemans, K., and Müller, J.-F.: EVAPORATION: a new vapour pressure estimation method for organic molecules including non-additivity and intramolecular interactions, *Atmos. Chem. Phys.*, 11, 9431–9450, <https://doi.org/10.5194/acp-11-9431-2011>, 2011.
- Garmash, O., Rissanen, M. P., Pullinen, I., Schmitt, S., Kausiala, O., Tillmann, R., Zhao, D., Percival, C., Bannan, T. J., Priestley, M., Hallquist, Å. M., Kleist, E., Kiendler-Scharr, A., Hallquist, M., Berndt, T., McFiggans, G., Wildt, J., Mentel, T. F., and Ehn, M.: Multi-generation OH oxidation as a source for highly oxygenated organic molecules from aromatics, *Atmos. Chem. Phys.*, 20, 515–537, <https://doi.org/10.5194/acp-20-515-2020>, 2020.
- Goldstein, A. H. and Galbally, I. E.: Known and Unexplored Organic Constituents in the Earth's Atmosphere, *Environ. Sci. Technol.*, 41, 1514–1521, <https://doi.org/10.1021/es072476p>, 2007.
- Hyttinen, N., Otkjær, R. V., Iyer, S., Kjaergaard, H. G., Rissanen, M. P., Wennberg, P. O., and Kurtén, T.: Computational Comparison of Different Reagent Ions in the Chemical Ionization of Oxidized Multifunctional Compounds, *J. Phys. Chem. A*, 122, 269–279, <https://doi.org/10.1021/acs.jpca.7b10015>, 2018.
- Jokinen, T., Sipilä, M., Junninen, H., Ehn, M., Lönn, G., Hakala, J., Petäjä, T., Mauldin, R. L., Kulmala, M., and Worsnop, D. R.: Atmospheric sulphuric acid and neutral cluster measurements using CI-API-TOF, *Atmos. Chem. Phys.*, 12, 4117–4125, <https://doi.org/10.5194/acp-12-4117-2012>, 2012.
- Lightfoot, P. D., Cox, R. A., Crowley, J. N., Destriau, M., Hayman, G. D., Jenkin, M. E., Moortgat, G. K., and Zabel, F.: Organic peroxy radicals: Kinetics, spectroscopy and tropospheric chemistry, *Atmospheric Environment. Part A. General Topics*, 26, 1805–1961, [https://doi.org/10.1016/0960-1686\(92\)90423-I](https://doi.org/10.1016/0960-1686(92)90423-I), 1992.
- Molteni, U., Bianchi, F., Klein, F., El Haddad, I., Frege, C., Rossi, M. J., Dommen, J., and Baltensperger, U.: Formation of highly oxygenated organic molecules from aromatic compounds, *Atmos. Chem. Phys.*, 18, 1909–1921, <https://doi.org/10.5194/acp-18-1909-2018>, 2018.
- Myrdal, P. B. and Yalkowsky, S. H.: Estimating Pure Component Vapor Pressures of Complex Organic Molecules, *Ind. Eng. Chem. Res.*, 36, 2494–2499, <https://doi.org/10.1021/ie950242l>, 1997.
- Nannoolal, Y., Rarey, J., and Ramjugernath, D.: Estimation of pure component properties, *Fluid Phase Equilibria*, 269, 117–133, <https://doi.org/10.1016/j.fluid.2008.04.020>, 2008.
- O'Meara, S., Booth, A. M., Barley, M. H., Topping, D., and McFiggans, G.: An assessment of vapour pressure estimation methods, *Phys. Chem. Chem. Phys.*, 16, 19453–19469, <https://doi.org/10.1039/C4CP00857J>, 2014.
- Sekar, A., Varghese, G. K., and Ravi Varma, M. K.: Analysis of benzene air quality standards, monitoring methods and concentrations in indoor and outdoor environment, *Heliyon*, 5, e02918, <https://doi.org/10.1016/j.heliyon.2019.e02918>, 2019.
- WHO global air quality guidelines. Particulate matter (PM<sub>2.5</sub> and PM<sub>10</sub>), ozone, nitrogen dioxide, sulfur dioxide and carbon monoxide., World Health Organization, Geneva, 2021.

Xu, L., Møller, K. H., Crouse, J. D., Kjaergaard, H. G., and Wennberg, P. O.: New Insights into the Radical Chemistry and Product Distribution in the OH-Initiated Oxidation of Benzene, *Environ. Sci. Technol.*, 54, 13467–13477, <https://doi.org/10.1021/acs.est.0c04780>, 2020.

## Supplementary Figures

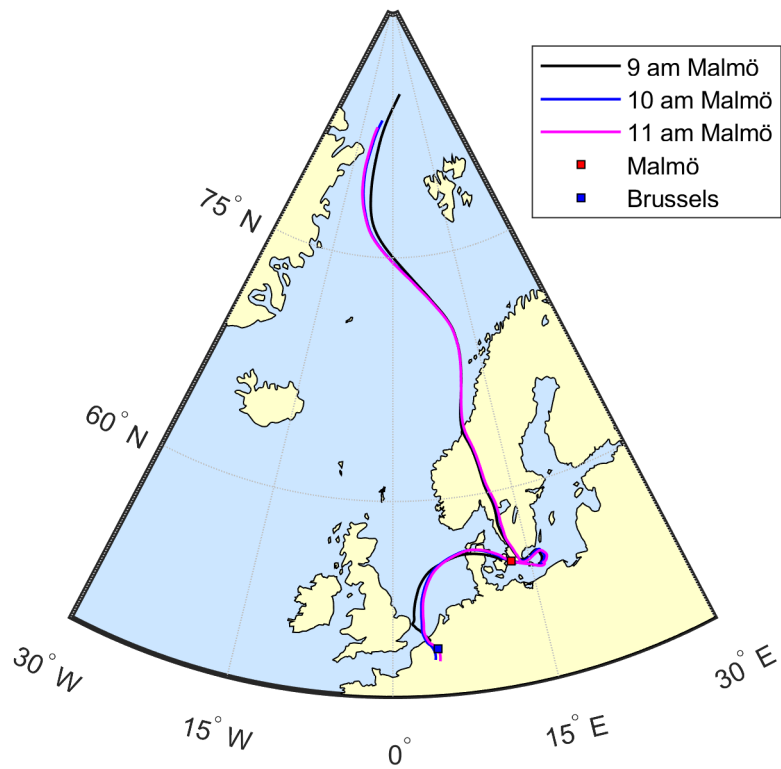

Fig S1 depicts the calculated air-mass trajectories for selected cases named after their local arriving time at Malmö, Sweden on April 28<sup>th</sup> (“9 am”, “10 am” and “11 am”; i.e. UTC + 1 hour).

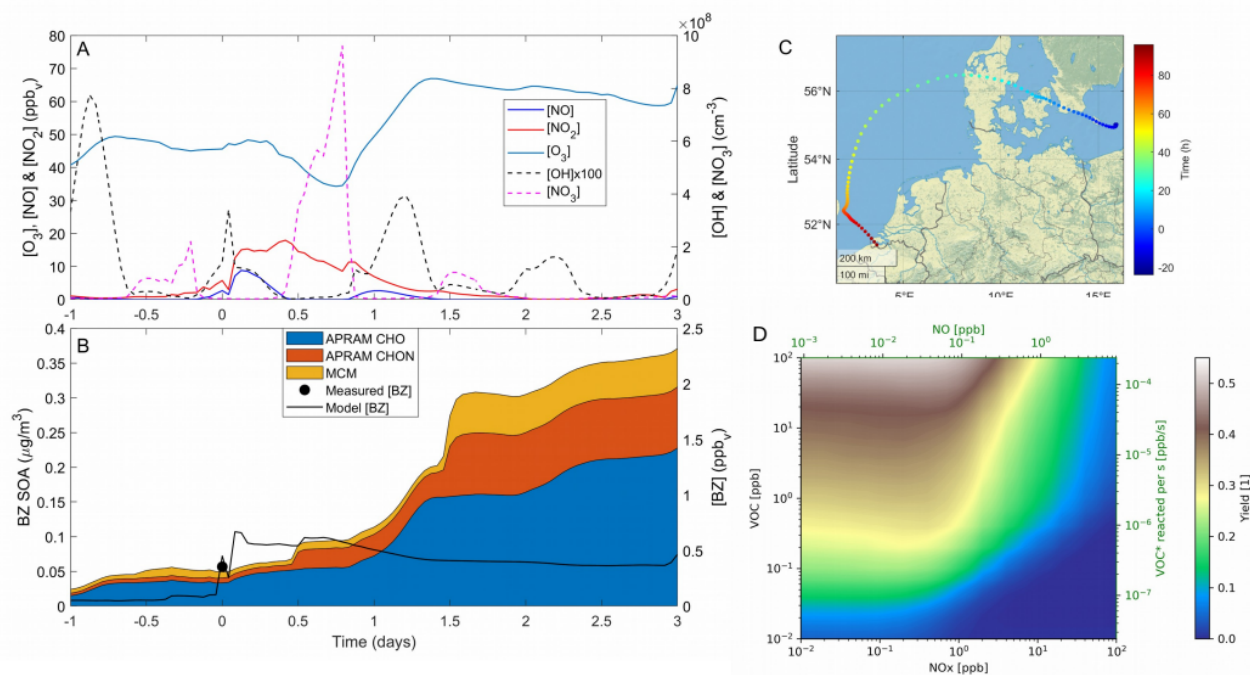

Fig. S2: ADCHEM results along the Case 1 (“9 am”) air mass trajectory. Panel A shows the modelled gas-phase concentrations of NO, NO<sub>2</sub>, O<sub>3</sub>, OH and NO<sub>3</sub> from 1 day upwind (-1 day) to 3 days downwind Malmö. Panel B shows the modelled benzene gas-phase concentrations ([BZ]) and the modelled benzene SOA mass concentrations of non-nitrate APRAM species, APRAM organonitrates and MCM species. The modelled [BZ] is also compared with the observed benzene concentrations at the measurement station Dalaplan in Malmö. The air mass trajectory path is displayed in panel C. Panel D illustrates the computed mass yield from OH oxidation in the presence of different levels of NO<sub>x</sub> and VOC. Bottom and top abscissas depict NO<sub>x</sub> and NO concentrations. VOC mixing ratio and VOC turnover are shown by the left- and the right-hand ordinate, respectively. The color code indicates the mass yield value.

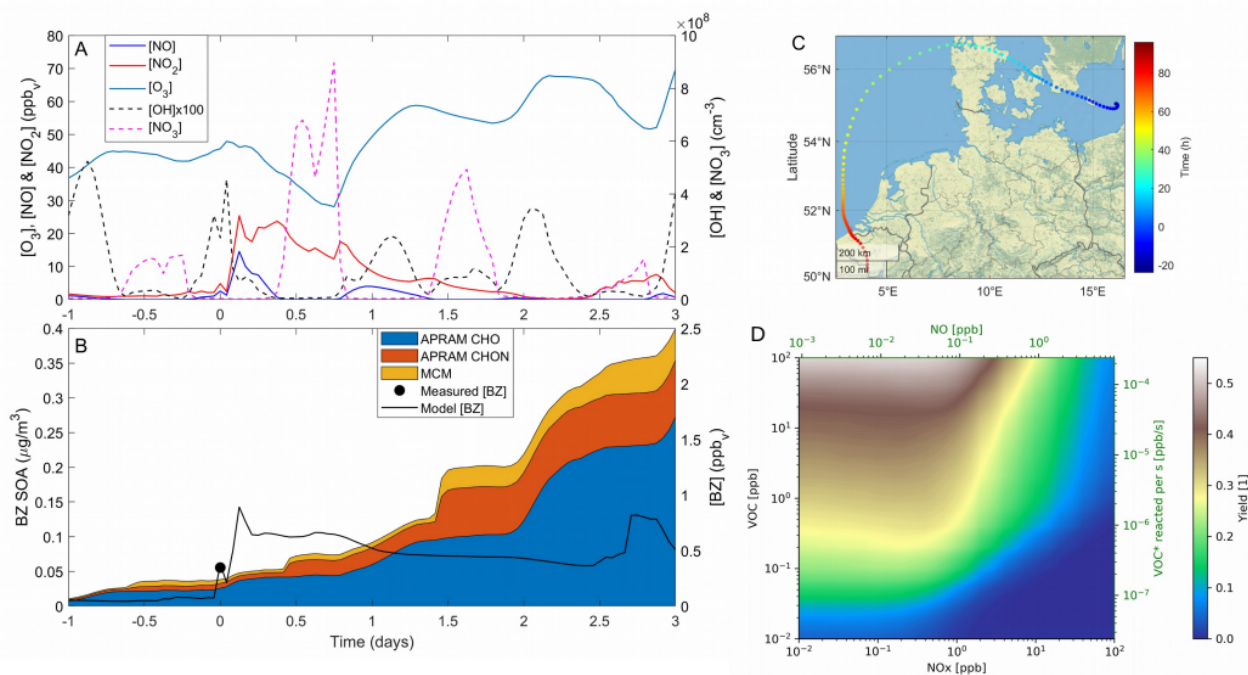

Fig. S3: ADCHEM results along the Case 2 ("10 am") air mass trajectory. Panel A shows the modelled gas-phase concentrations of NO, NO<sub>2</sub>, O<sub>3</sub>, OH and NO<sub>3</sub> from 1 day upwind (-1 day) to 3 days downwind Malmö. Panel B shows the modelled benzene gas-phase concentrations ([BZ]) and the modelled benzene SOA mass concentrations of non-nitrate APRAM species, APRAM organonitrates and MCM species. The modelled [BZ] is also compared with the observed benzene concentrations at the measurement station Dalaplan in Malmö. The air mass trajectory path is displayed in panel C. Panel D illustrates the computed mass yield from OH oxidation in the presence of different levels of NO<sub>x</sub> and VOC. Bottom and top abscissas depict NO<sub>x</sub> and NO concentrations. VOC mixing ratio and VOC turnover are shown by the left- and the right-hand ordinate, respectively. The color code indicates the mass yield value.

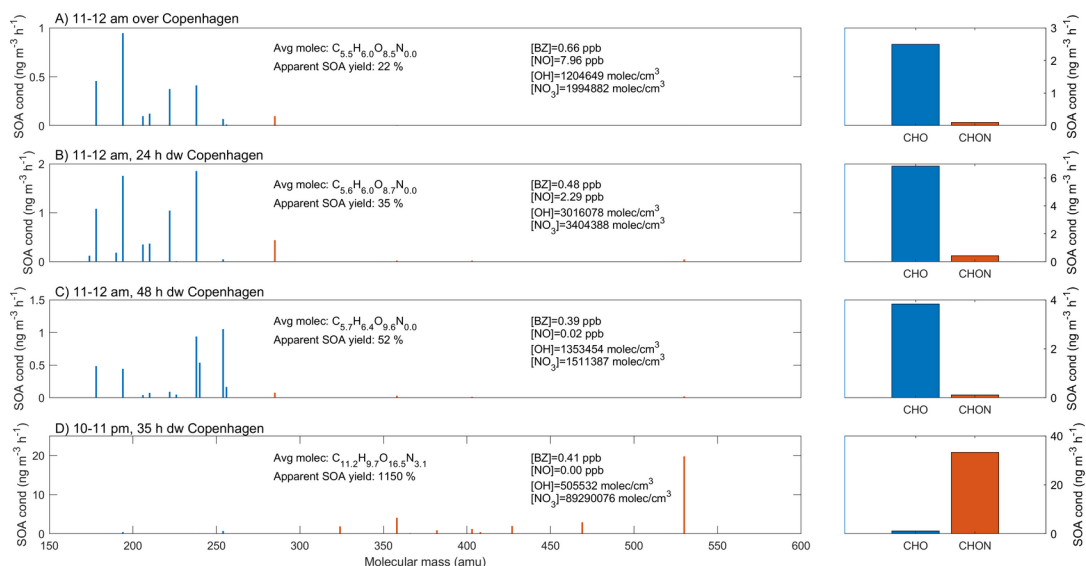

Fig S4: Modelled APRAM benzene SOA mass spectrum of the condensing species during selected 1 hour time slots along the air mass trajectory (Case 1 - “9 am”). Panel A, B and C shows daytime (11-12 am) mass spectrum over the Copenhagen region, 24 hours downwind Copenhagen and 48 hours downwind Copenhagen respectively. Panel D show the mass spectrum which represent the conditions shortly after the sunset (10-11 pm), 35 h downwind Copenhagen. The subpanels to the right show the integrated total APRAM benzene SOA non-nitrate and organonitrate SOA mass increase within the selected time slots. Additional information about the condensing SOA average molecular composition, the apparent SOA yields, the benzene, NO, OH and NO<sub>3</sub> concentrations, and molecular formulas of the major mass peaks are displayed in each panel.

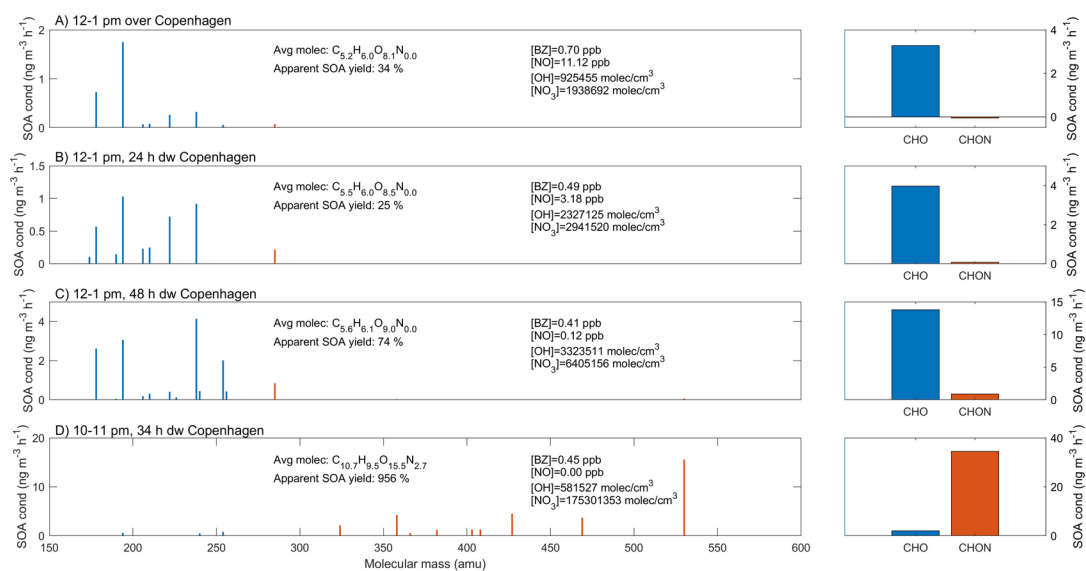

Fig S5: Modelled APRAM benzene SOA mass spectrum of the condensing species during selected 1 hour time slots along the air mass trajectory (Case 2, “10 am”). Panel A, B and C shows daytime (12-1 pm) mass spectrum over the Copenhagen region, 24 hours downwind Copenhagen and 48 hours downwind Copenhagen respectively. Panel D show the mass spectrum which represent the conditions shortly after the sunset (10-11 pm), 34 h downwind Copenhagen. The subpanels to the right show the integrated total APRAM benzene SOA non-nitrate and organonitrate SOA mass increase within the selected time slots. Additional information about the condensing SOA average

molecular composition, the apparent SOA yield, the benzene, NO, OH and NO<sub>3</sub> concentrations, and molecular formulas of the major mass peaks are displayed in each panel.

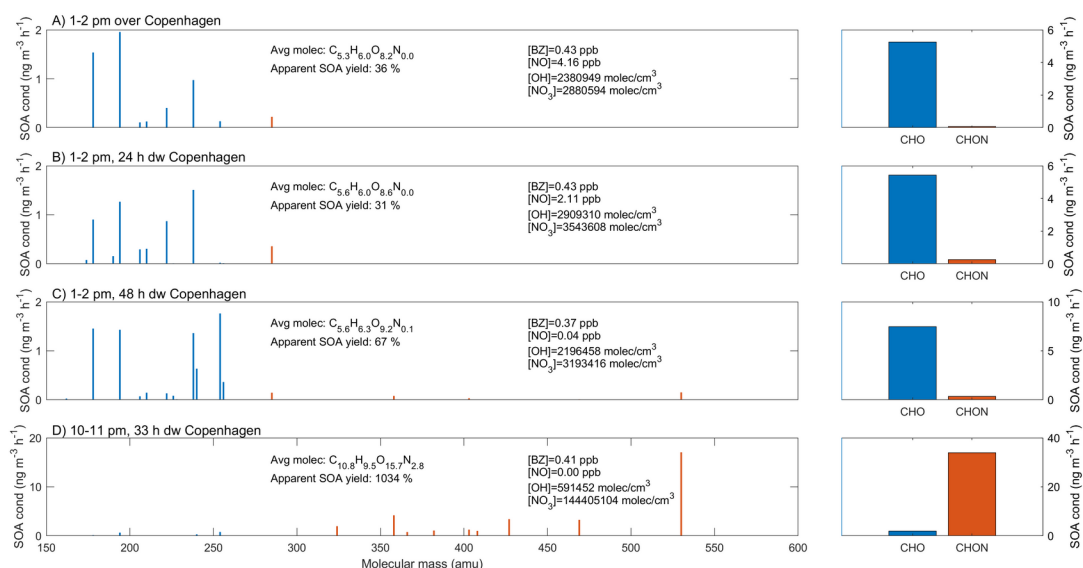

Fig S6: Modelled APRAM benzene SOA mass spectrum of the condensing species during selected 1 hour time slots along the air mass trajectory (Case 3, “11 am”). Panel A, B and C shows daytime (1-2 pm) mass spectrum over the Copenhagen region, 24 hours downwind Copenhagen and 48 hours downwind Copenhagen respectively. Panel D show the mass spectrum which represent the conditions shortly after the sunset (10-11 pm), 33 h downwind Copenhagen. The subpanels to the right show the integrated total APRAM benzene SOA non-nitrate and organonitrate SOA mass increase within the selected time slots. Additional information about the condensing SOA average molecular composition, the apparent SOA yield, the benzene, NO, OH and NO<sub>3</sub> concentrations, and molecular formulas of the major mass peaks are displayed in each panel.

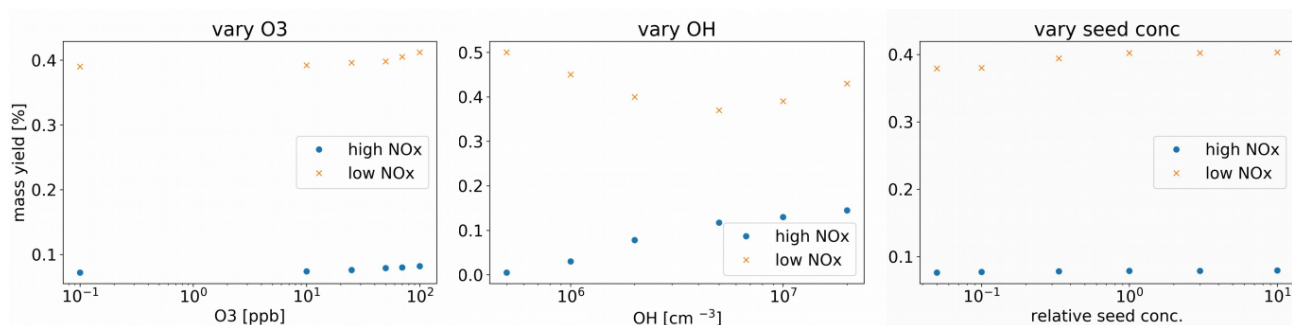

Fig S7: Variation of O<sub>3</sub>, OH and relative seed aerosol concentration (base seed aerosol value refers to 10 μg m<sup>-3</sup> seed aerosol of 55 nm in diameter; concentration is varied by keeping the mass concentration constant and varying seed aerosol diameter which results in a seed aerosol concentration change) relative to the values used in the parametric yield study and impact on the mass yield. Two different VOC/NO<sub>x</sub> pairs are considered: “high NO<sub>x</sub>” conditions comprise a benzene mixing ratio of 0.3 ppb and 10 ppb of NO<sub>x</sub>. A benzene level of 10 ppb and 0.1 ppb NO<sub>x</sub> forms the input for the “low NO<sub>x</sub>” condition.

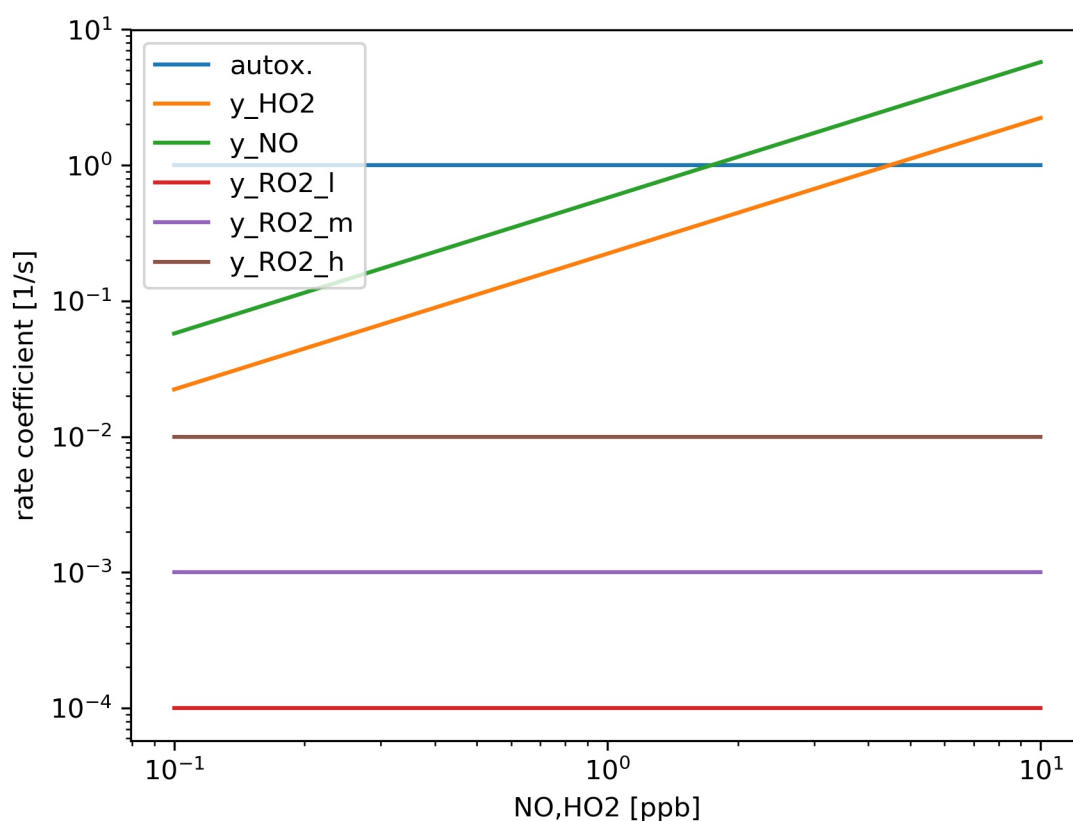

Fig S8: Peroxy radical loss rate (rate coefficient in  $\text{s}^{-1}$ ) for peroxy radical reactions  $\text{RO}_2 + \text{HO}_2$  ( $y_{\text{HO}_2}$ ),  $\text{RO}_2 + \text{NO}$  ( $y_{\text{NO}}$ ),  $\text{RO}_2 + \text{RO}_2^*$  ( $y_{\text{RO}_2\_l}$ ,  $y_{\text{RO}_2\_m}$ ,  $y_{\text{RO}_2\_h}$ ) and autoxidation reaction (assuming a H-shift rate of  $1 \text{ s}^{-1}$ ) at a temperature of 296 K.  $\text{RO}_2^*$  represents the pool of peroxy radicals in the system (assumption  $[\text{RO}_2^*] = 10^9 \text{ cm}^{-3}$ ) with three different rate coefficients ( $k_{\text{RO}_2\text{RO}_2}$ ) for the  $\text{RO}_2 - \text{RO}_2$  reaction ( $y_{\text{RO}_2\_l}$ :  $10^{-13}$ ;  $y_{\text{RO}_2\_m}$ :  $10^{-12}$ ;  $y_{\text{RO}_2\_h}$ :  $10^{-11}$  in  $\text{s}^{-1}\text{cm}^3$ , respectively). Yields for the reaction of  $\text{RO}_2$  with  $\text{HO}_2$  ( $k_{\text{RO}_2\text{HO}_2}$ ) and  $\text{NO}$  ( $k_{\text{RO}_2\text{NO}}$ ) are obtained from MCM<sup>1</sup>.

<sup>1</sup> See e.g. mcm webpage: <http://mcm.york.ac.uk/parameters/simple.htm> (visited Oct. 14<sup>th</sup> 2022)



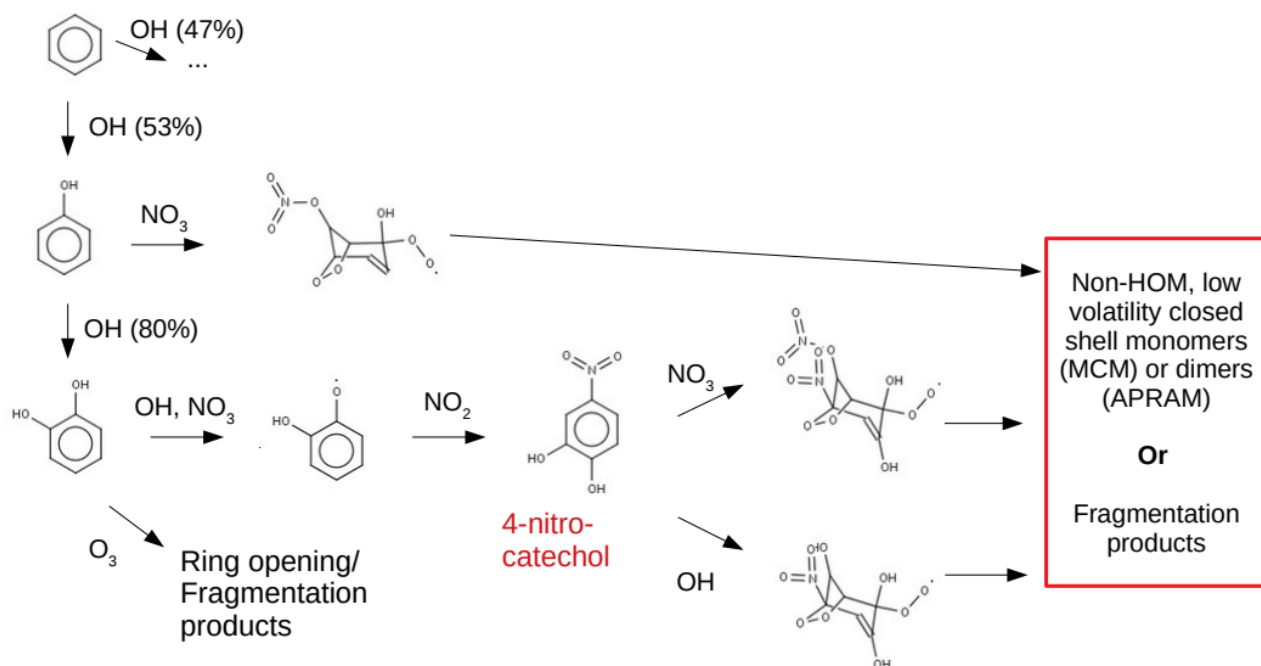

Fig S9: Reaction path in MCM leading to high apparent OH-mass yield at (nighttime)  $\text{NO}_3$  radical-oxidation of benzene OH-oxidation products.

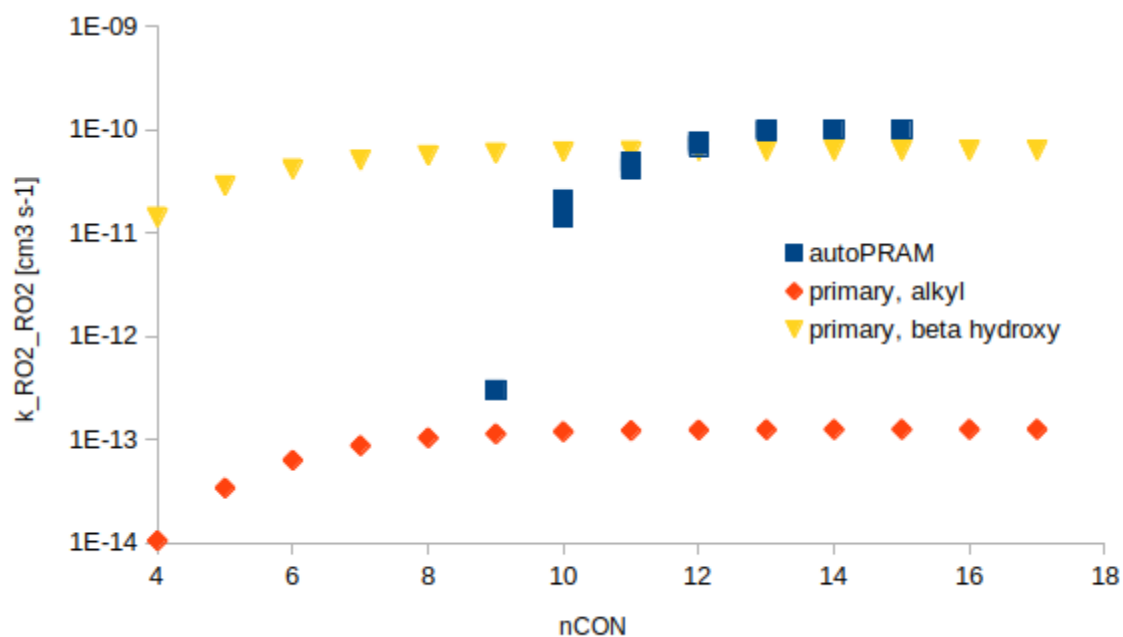

Fig S10: Dimer formation rates, as used in the benzene chemistry from autoAPRAMfw (“autoPRAM”), compared to SAR-based  $\text{RO}_2\text{-RO}_2$  rate coefficients provided by Jenkin et al., (2019) for two different peroxy radical types. “nCON” depicts the number of carbon, oxygen and nitrogen atoms in the structure.

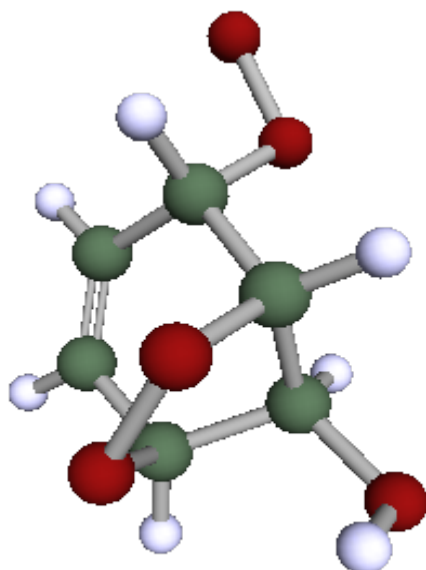

BZBI-orthosyn.sdf

Fig S11: likely peroxy radical structure amongst  $C_6H_7O_5$  isomers.

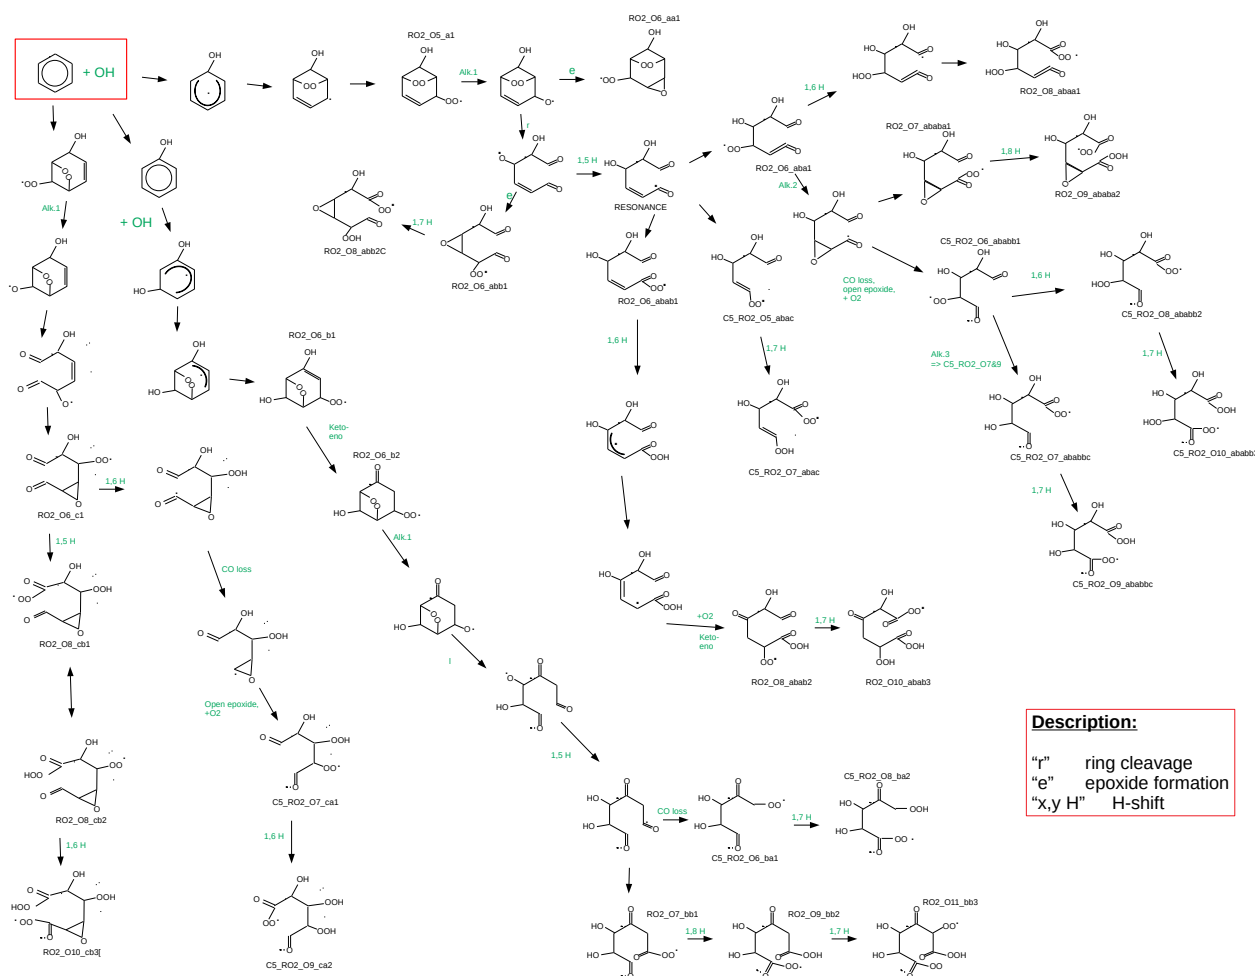

Fig S12/scheme: formation of potential radical structures and the respective reaction pathways. The aim is to suggest structures for the peroxy radicals observed in experiments. These structures serve as input for autoSMILES.

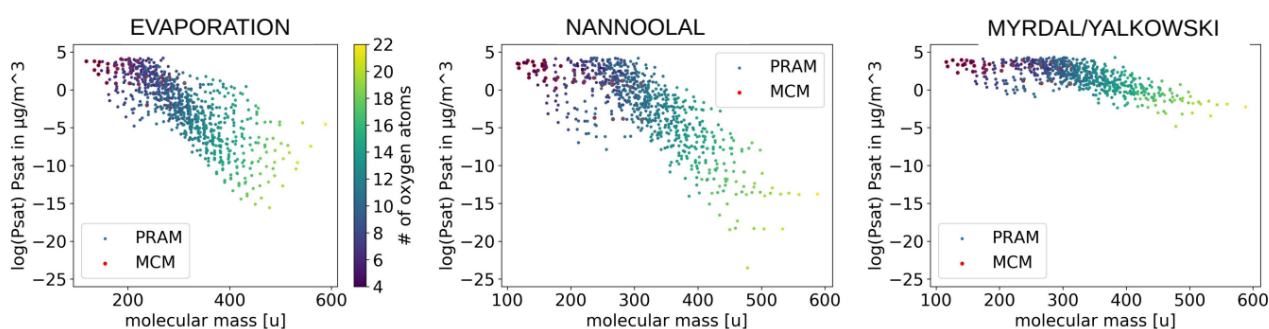

Fig S13: Saturation vapor pressure (ordinate) at room temperature as a function of molecular mass (abscissa) for three different group contribution methods. The colorbar indicates the number of oxygen atoms. Results are distinguished by whether the molecules are mainly formed by MCM (red signs) or autoxidation chemistry (i.e., autoAPRAM-fw species; all other colors).

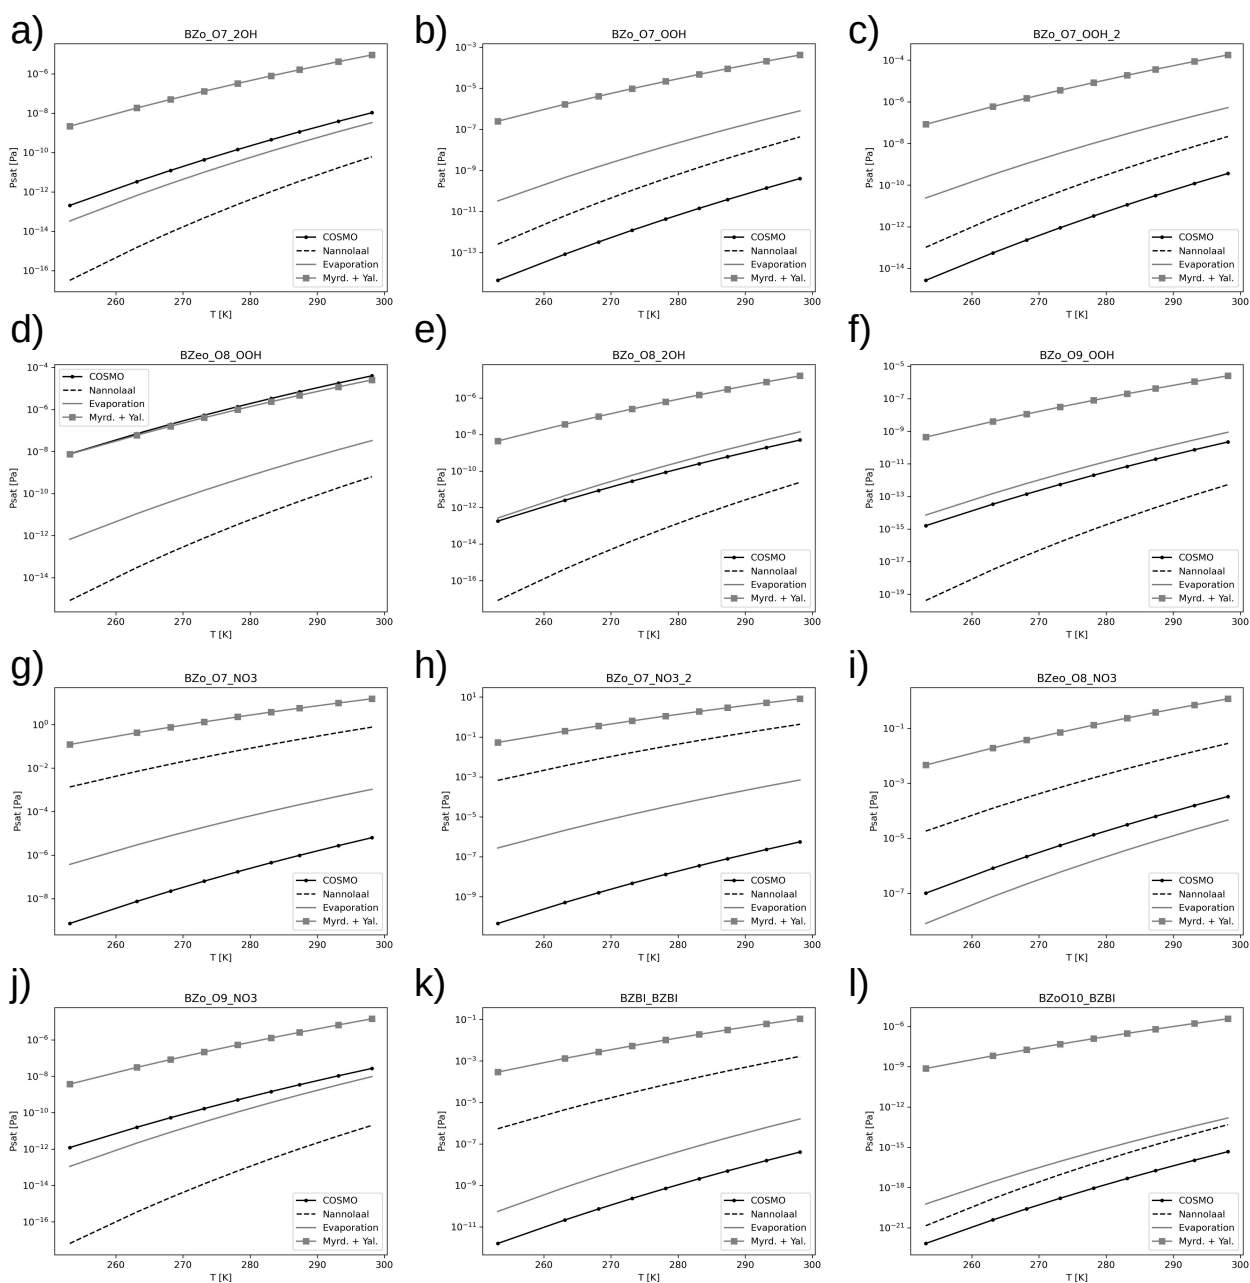

Fig S14: panels a to l depict the comparison of saturation vapor pressure estimates based on three group contribution methods (NANNOOLAL, EVAPORATION, MYRDAL/YALKOWSKI) and COSMO-RS for a temperature range from 250 K to 300 K. Each panel represents a chemical structure. The related SMILES strings defining the isomeric structures are listed in table ST1.

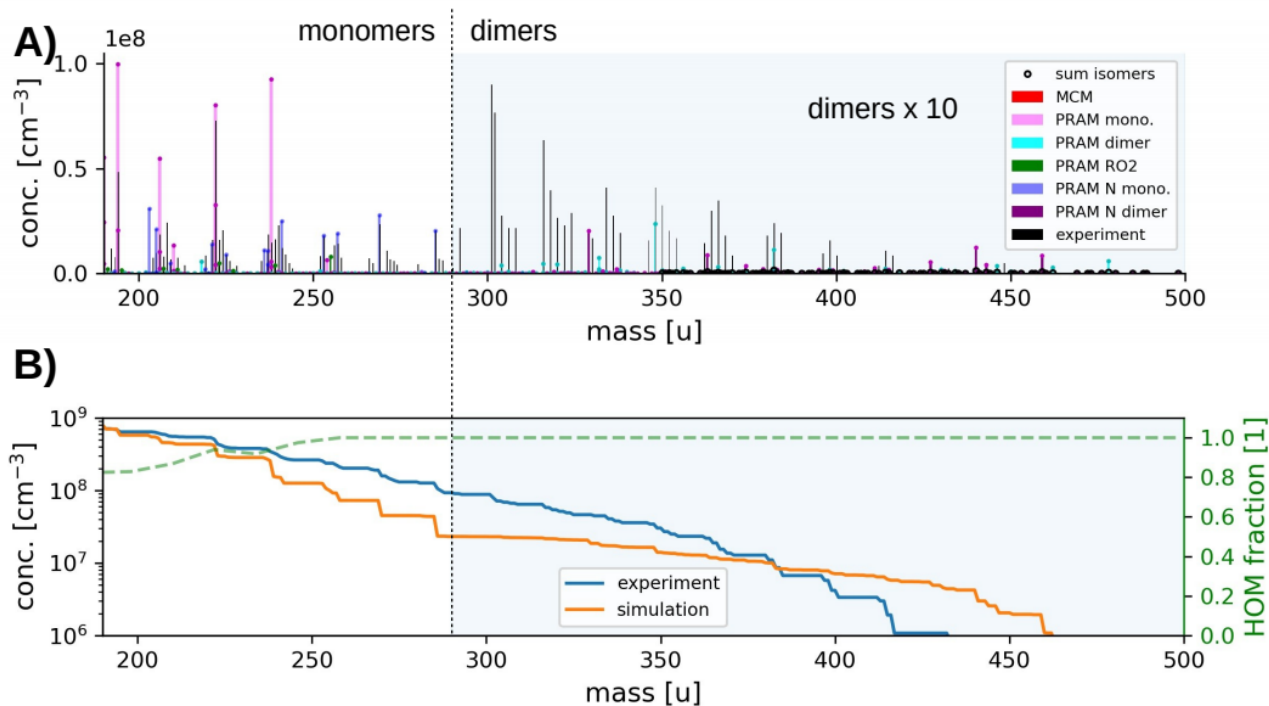

Fig S15: simulation of OH oxidation of benzene in the presence of high mixing ratios of  $\text{NO}_x$  (> 100 ppb) and UV light. Panel A) depicts the experimental results from chamber experiments (Garmash et al., 2020) (black bars) and the simulation results (colored bars). Nitrogen-containing molecules are marked with a “N”. The concentrations of experimentally determined and simulated dimers are raised by a factor 10 to improve readability. Cumulative representation of the model results, starting at the upper observed/simulated molecular mass limit, is shown in panel B). The secondary axis indicates the computed HOM fraction.

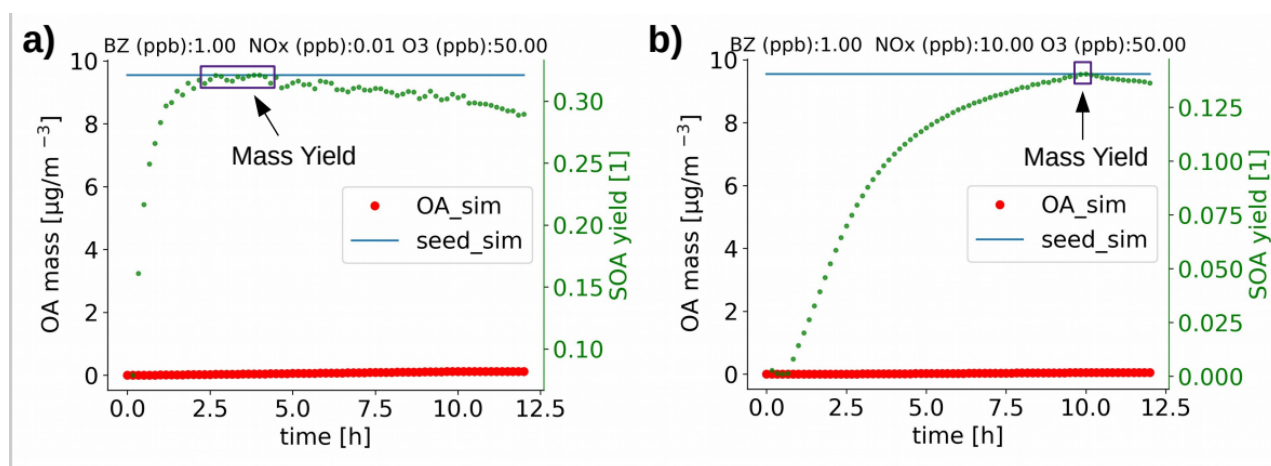

Fig S16: Examples of mass yield evolution curves. Panel a shows a situation where a maximum value is reached within 10 hours simulated. The purple square indicates the data points used for fitting the yield value. In panel b, no maximum is derived after 10 h simulated time. The left hand ordinate depicts the organic aerosol formed in the simulation (OA\_sim) as well as the seed aerosol mass (seed\_sim); the right hand ordinate represents the according mass yield. Note that the yield is defined as a function of benzene and secondary benzene (OH oxidation of MCM species “BZEPOXMUC” and phenol) consumption, respectively.

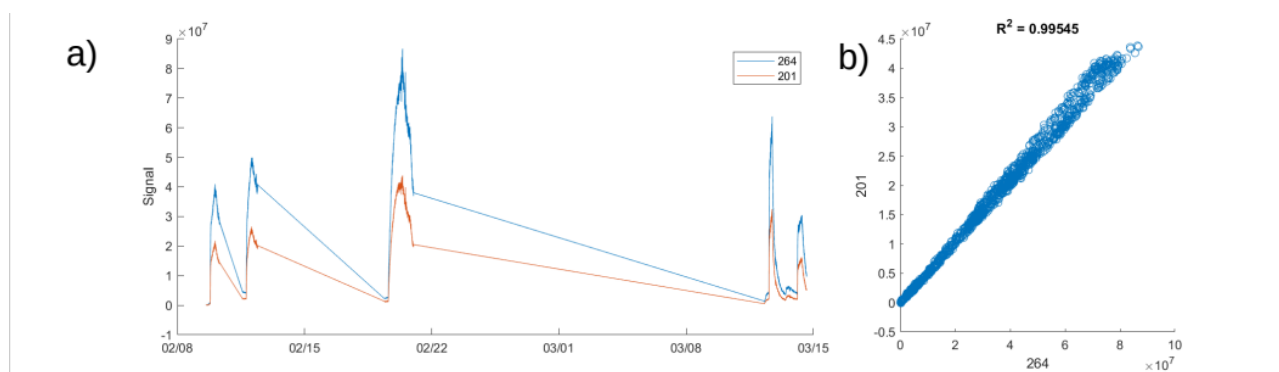

Fig S17 depicts the correlation of species of atomic mass 264 and 201. Panel a) illustrates the evolution of the two species' CIMS signals during experiments conducted at several days. Panel b) shows the correlation of the signals.

### References (SI-Figures):

Garmash, O., Rissanen, M. P., Pullinen, I., Schmitt, S., Kausiala, O., Tillmann, R., Zhao, D., Percival, C., Bannan, T. J., Priestley, M., Hallquist, Å. M., Kleist, E., Kiendler-Scharr, A., Hallquist, M., Berndt, T., McFiggans, G., Wildt, J., Mentel, T. F., and Ehn, M.: Multi-generation OH oxidation as a source for highly oxygenated organic molecules from aromatics, *Atmos. Chem. Phys.*, 20, 515–537, <https://doi.org/10.5194/acp-20-515-2020>, 2020.

Jenkin, M. E., Valorso, R., Aumont, B., and Rickard, A. R.: Estimation of rate coefficients and branching ratios for reactions of organic peroxy radicals for use in automated mechanism construction, *Atmos. Chem. Phys.*, 19, 7691–7717, <https://doi.org/10.5194/acp-19-7691-2019>, 2019.

## Supplementary Tables

| PRAM Name    | Suggested structure                                         | MM        |
|--------------|-------------------------------------------------------------|-----------|
| BZBI_BZBI    | <chem>O(C1C=CC2OOC1C2O)OC1C=CC2OOC1C2O</chem>               | 286.23516 |
| BZo_07_2OH   | <chem>O=C(O)C(O)C(=O)CC(OO)C(=O)OO</chem>                   | 224.12052 |
| BZo_07_NO3   | <chem>O=C(ON(=O)=O)C(O)C(O)C1OC1C(OO)=O</chem>              | 253.11858 |
| BZo_07_NO3_2 | <chem>O=C(ON(=O)=O)C(O)C(O)C(=O)CC(=O)OO</chem>             | 253.11858 |
| BZo_07_OOH   | <chem>O=C(OO)C(O)C(O)C1OC1C(OO)=O</chem>                    | 224.12052 |
| BZo_07_OOH_2 | <chem>O=C(OO)C(O)C(O)C(=O)CC(=O)OO</chem>                   | 224.12052 |
| BZo_08_2OH   | <chem>O=C(OO)C(O)C(O)C(=O)C(O)C(=O)OO</chem>                | 240.11952 |
| BZo_09_OOH   | <chem>O=C(OO)C(O)C(O)C(=O)C(OO)C(=O)OO</chem>               | 256.11852 |
| BZoO10_BZBI  | <chem>O=C(OO)C(O)C(O)C(=O)C(OOC1C=CC2OOC1C2O)C(=O)OO</chem> | 382.22916 |
| BZeo_08_OOH  | <chem>O=C(OO)C(O)C(=O)CC(OO)C(=O)OO</chem>                  | 240.11952 |
| BZo_09_NO3   | <chem>O=C(OO)C(O)C(O)C(=O)C(ON(=O)=O)C(=O)OO</chem>         | 285.11658 |
| BZeo_08_NO3  | <chem>O=C(ON(=O)=O)C(O)C(=O)CC(OO)C(=O)OO</chem>            | 269.11758 |

Table ST1: List of exemplary structures that is investigated with all saturation vapor pressure methods (COSMO-RS, EVAPORATION, NANNOOLAL, MYRDAL/YALKOWSKI) including the species name, the SMILES description of the structure and the molecular mass (MM).

|                       |                                                |
|-----------------------|------------------------------------------------|
| benzene (ppb)         | $10^{-2} - 10^2$ ppb <sub>v</sub>              |
| NO <sub>x</sub> (ppb) | $10^{-2} - 10^2$ ppb <sub>v</sub>              |
| methane               | 2 ppm <sub>v</sub>                             |
| CO                    | 200 ppb <sub>v</sub>                           |
| NO                    | 0.1 * NO <sub>2</sub>                          |
| SO <sub>2</sub>       | 10 ppt <sub>v</sub>                            |
| sunlight Intensity    | Equiv. to const. OH of $10^6$ cm <sup>-3</sup> |
| temperature           | 293.15 K                                       |
| relative humidity     | 60%                                            |
| pressure              | $10^5$ Pa                                      |
| model Δt [s]          | 5                                              |

Table ST2: overview of input parameters for the parametric yield study under atmospheric conditions. Benzene and NO<sub>x</sub> levels are varied in the given range while other parameters remain constant.

|                                     |          |
|-------------------------------------|----------|
| OH [cm <sup>-3</sup> ]              | 8.5E+11  |
| HO <sub>2</sub> [cm <sup>-3</sup> ] | 1.7E+12  |
| Benzene [cm <sup>-3</sup> ]         | 9.85E+13 |
| O <sub>3</sub> [cm <sup>-3</sup> ]  | 3.36E+12 |
| Temp. [K]                           | 298.13   |
| RH [%]                              | 40       |
| residence time [s]                  | 20       |
| tube diameter [cm]                  | 7.4      |

|                      |     |
|----------------------|-----|
| model $\Delta t$ [s] | 0.1 |
|----------------------|-----|

*Table ST3: initial values for gas phase species entering the flow tube. Temperature (Temp.) and relative humidity (RH) are considered constant while traveling through the tube, while the gas phase chemical species are allowed to evolve.*

|                                     |        |
|-------------------------------------|--------|
| Chamber Vol. [m <sup>3</sup> ]      | 1.45   |
| inflow [l/min]                      | 30     |
| model $\Delta t$ [s]                | 10     |
| RH [%]                              | 65     |
| T [K]                               | 287.35 |
| simulation time [h]                 | 20     |
| Benzene [ppb <sub>v</sub> ]         | 15.4   |
| O <sub>3</sub> [ppb <sub>v</sub> ]  | 58     |
| NO [ppb <sub>v</sub> ]              | 1.075  |
| NO <sub>2</sub> [ppb <sub>v</sub> ] | 3.225  |
| SO <sub>2</sub> [ppb <sub>v</sub> ] | 0.01   |
| CO [ppb <sub>v</sub> ]              | 1      |

*Table ST4: inputs for simulating gas phase chemistry experiments in JPAC chamber under high NO<sub>x</sub> conditions. The mean residence time is 45 min. Concentration of species listed in the table are considered constant throughout the simulation (i.e. flow reactor experiment).*

|                                     |             |
|-------------------------------------|-------------|
| Chamber Vol. [m <sup>3</sup> ]      | 1.45        |
| in-/outflow [l/min]                 | 30          |
| model $\Delta t$ [s]                | 10          |
| RH [%]                              | 65          |
| T [K]                               | 287.35      |
| simulation time [h]                 | 20          |
| Benzene [ppb <sub>v</sub> ]         | 15.7        |
| O <sub>3</sub> [ppb <sub>v</sub> ]  | 42          |
| NO [ppb <sub>v</sub> ]              | 0.0001      |
| NO <sub>2</sub> [ppb <sub>v</sub> ] | 0.001       |
| SO <sub>2</sub> [ppb <sub>v</sub> ] | 0.01        |
| CO [ppb <sub>v</sub> ]              | 1           |
| seed addition time [h]              | 12.4 – 16.1 |
| d <sub>p,m</sub> [nm]               | 100         |
| $\sigma_g$                          | 1.2         |
| double charged fraction [%]         | 25          |

*Table ST5: inputs for simulating SOA formation experiments in JPAC chamber. The mean residence time is 45 min. Seed aerosol is added for a period of roughly 3.7 hours, 12.4 hours after the start of the experiment. Concentration of species listed in the table are considered constant throughout the simulation (i.e. flow reactor experiment).*

|                                | low NO <sub>x</sub> | High NO <sub>x</sub> |
|--------------------------------|---------------------|----------------------|
| Chamber Vol. [m <sup>3</sup> ] | 28                  | 28                   |



|                                                   |        |           |
|---------------------------------------------------|--------|-----------|
| outflow [l/min]                                   | 5      | 5         |
| model $\Delta t$ [s]                              | 10     | 10        |
| RH [%]                                            | 5      | 5         |
| T [K]                                             | 295    | 295       |
| simulation time [h]                               | 7      | 7         |
| Benzene [ppb <sub>v</sub> ]                       | 395    | 337       |
| O <sub>3</sub> [ppb <sub>v</sub> ]                | 15     | simulated |
| H <sub>2</sub> O <sub>2</sub> [ppm <sub>v</sub> ] | 4      | --        |
| HONO [ppb <sub>v</sub> ]                          | --     | 350       |
| NO [ppb <sub>v</sub> ]                            | 0.0001 | 83        |
| NO <sub>2</sub> [ppb <sub>v</sub> ]               | 0.001  | 86        |
| SO <sub>2</sub> [ppb <sub>v</sub> ]               | 0.01   | 0.01      |
| CO [ppb <sub>v</sub> ]                            | 1      | 1         |
| d <sub>p,m</sub> [nm]                             | 55     | 55        |
| $\sigma_g$                                        | 1.2    | 1.2       |
| double charged fraction [%]                       | 25     | 25        |

**Table ST6:** summary of model inputs for simulations of CALTECH chamber under low and high NO<sub>x</sub> conditions, respectively. The chemical species and seed aerosol are added at the start of the experiment/simulation (i.e. batch-mode experiment). Oxidants form from photolysing precursors (H<sub>2</sub>O<sub>2</sub> and HONO). The light spectrum was obtained from Cocker et al., (2001).

| autoAPRAM-fw name | C | H | O  | N | Structure (SMILES-format)                       |
|-------------------|---|---|----|---|-------------------------------------------------|
| BZo_RO2_O7        | 6 | 7 | 7  | 0 | <chem>O=CC(O)C(O)C1OC1C(O[O])=O</chem>          |
| BZo_RO2_O9        | 6 | 7 | 9  | 0 | <chem>O=C(O[O])C(O)C(O)C1OC1C(OO)=O</chem>      |
| BZo_RO2_O11       | 6 | 7 | 11 | 0 | <chem>O=C(OO)C(O)C(O)C(=O)C(O[O])C(=O)OO</chem> |
| BZeo_RO2_O6       | 6 | 7 | 6  | 0 | <chem>[O]OC1C2OC2C3OOC1C3(O)</chem>             |
| BZeo_RO2_O8       | 6 | 7 | 8  | 0 | <chem>O=C=CC(OO)C(O)C(O)C(=O)O[O]</chem>        |
| BZeo_RO2_O10      | 6 | 7 | 10 | 0 | <chem>O=C(O[O])C(O)C(=O)CC(OO)C(=O)OO</chem>    |
| C5_RO2_O6         | 5 | 7 | 6  | 0 | <chem>O=CC(O[O])C(O)C(O)C=O</chem>              |
| C5_RO2_O7         | 5 | 7 | 7  | 0 | <chem>OOC=CC(O)C(O)C(=O)O[O]</chem>             |
| C5_RO2_O8         | 5 | 7 | 8  | 0 | <chem>O=CC(OO)C(O)C(O)C(O[O])=O</chem>          |
| C5_RO2_O9         | 5 | 7 | 9  | 0 | <chem>O=C(O[O])C(O)C(O)C(O)C(=O)OO</chem>       |
| C5_RO2_O10        | 5 | 7 | 10 | 0 | <chem>O=C(O[O])C(OO)C(O)C(O)C(OO)=O</chem>      |
| BZo_O4_2OH        | 6 | 8 | 6  | 0 | <chem>O=CC(O)C(O)C1OC1C(O)=O</chem>             |
| BZo_O6_2OH        | 6 | 8 | 8  | 0 | <chem>O=C(O)C(O)C(O)C1OC1C(OO)=O</chem>         |
| BZo_O8_2OH        | 6 | 8 | 10 | 0 | <chem>O=C(OO)C(O)C(O)C(=O)C(O)C(=O)OO</chem>    |
| BZeo_O3_2OH       | 6 | 8 | 5  | 0 | <chem>OC1C2OC2C3OOC1C3(O)</chem>                |
| BZeo_O5_2OH       | 6 | 8 | 7  | 0 | <chem>O=C=CC(OO)C(O)C(O)C(=O)O</chem>           |
| BZeo_O7_2OH       | 6 | 8 | 9  | 0 | <chem>O=C(O)C(O)C(=O)CC(OO)C(=O)OO</chem>       |
| C5e_O3_2OH        | 5 | 8 | 5  | 0 | <chem>O=CC(O)C(O)C(O)C=O</chem>                 |
| C5_O4_2OH         | 5 | 8 | 6  | 0 | <chem>OOC=CC(O)C(O)C(=O)O</chem>                |
| C5e_O5_2OH        | 5 | 8 | 7  | 0 | <chem>O=CC(OO)C(O)C(O)C(O)=O</chem>             |
| C5_O6_2OH         | 5 | 8 | 8  | 0 | <chem>O=C(O)C(O)C(O)C(O)C(=O)OO</chem>          |
| C5e_O7_2OH        | 5 | 8 | 9  | 0 | <chem>O=C(O)C(OO)C(O)C(O)C(OO)=O</chem>         |
| BZo_O5_O          | 6 | 6 | 6  | 0 | <chem>O=CC(=O)C(O)C1OC1C(O)=O</chem>            |
| BZo_O7_O          | 6 | 6 | 8  | 0 | <chem>O=C(O)C(=O)C(O)C1OC1C(OO)=O</chem>        |
| BZo_O9_O          | 6 | 6 | 10 | 0 | <chem>O=C(OO)C(O)C(O)C(=O)C(=O)C(=O)OO</chem>   |
| BZeo_O4_O         | 6 | 6 | 5  | 0 | <chem>O=C1C2OC2C3OOC1C3(O)</chem>               |
| BZeo_O6_O         | 6 | 6 | 7  | 0 | <chem>O=C=CC(OO)C(=O)C(O)C(=O)O</chem>          |
| BZeo_O8_O         | 6 | 6 | 9  | 0 | <chem>O=C(O)C(=O)C(=O)CC(OO)C(=O)OO</chem>      |
| C5e_O4_O          | 5 | 6 | 5  | 0 | <chem>O=CC(=O)C(O)C(O)C=O</chem>                |
| C5_O5_O           | 5 | 6 | 6  | 0 | <chem>OOC=CC(=O)C(O)C(=O)O</chem>               |
| C5e_O6_O          | 5 | 6 | 7  | 0 | <chem>O=CC(OO)C(=O)C(O)C(O)=O</chem>            |
| C5_O7_O           | 5 | 6 | 8  | 0 | <chem>O=C(O)C(=O)C(O)C(O)C(=O)OO</chem>         |
| C5e_O8_O          | 5 | 6 | 9  | 0 | <chem>O=C(O)C(OO)C(=O)C(O)C(OO)=O</chem>        |
| BZouni_O6_O       | 6 | 6 | 7  | 0 | <chem>O=CC(=O)C(O)C1OC1C(OO)=O</chem>           |
| BZouni_O8_O       | 6 | 6 | 9  | 0 | <chem>O=C(OO)C(=O)C(O)C1OC1C(OO)=O</chem>       |
| BZouni_O10_O      | 6 | 6 | 11 | 0 | <chem>O=C(OO)C(=O)C(O)C(=O)C(OO)C(=O)OO</chem>  |
| BZeouni_O5_O      | 6 | 6 | 6  | 0 | <chem>OOC1C2OC2C3OOC1C3(=O)</chem>              |
| BZeouni_O7_O      | 6 | 6 | 8  | 0 | <chem>O=C=CC(OO)C(=O)C(O)C(=O)OO</chem>         |
| BZeouni_O9_O      | 6 | 6 | 10 | 0 | <chem>O=C(OO)C(=O)C(=O)CC(OO)C(=O)OO</chem>     |

|              |    |    |    |   |                                                                     |
|--------------|----|----|----|---|---------------------------------------------------------------------|
| C5euni_05_O  | 5  | 6  | 6  | 0 | O=CC(OO)C(=O)C(O)C=O                                                |
| C5uni_06_O   | 5  | 6  | 7  | 0 | OOC=CC(=O)C(O)C(=O)OO                                               |
| C5euni_07_O  | 5  | 6  | 8  | 0 | O=CC(OO)C(=O)C(O)C(OO)=O                                            |
| C5uni_08_O   | 5  | 6  | 9  | 0 | O=C(OO)C(=O)C(O)C(O)C(=O)OO                                         |
| C5euni_09_O  | 5  | 6  | 10 | 0 | O=C(OO)C(OO)C(=O)C(O)C(OO)=O                                        |
| BZo_RO_06    | 6  | 7  | 6  | 0 | O=CC(O)C(O)C1OC1C([O])=O                                            |
| BZo_RO_08    | 6  | 7  | 8  | 0 | O=C([O])C(O)C(O)C1OC1C(OO)=O                                        |
| BZo_RO_010   | 6  | 7  | 10 | 0 | O=C(OO)C(O)C(O)C(=O)C([O])C(=O)OO                                   |
| BZeo_RO_05   | 6  | 7  | 5  | 0 | [O]C1C2OC2C3OOC1C3(O)                                               |
| BZeo_RO_07   | 6  | 7  | 7  | 0 | O=C=CC(OO)C(O)C(O)C(=O)[O]                                          |
| BZeo_RO_09   | 6  | 7  | 9  | 0 | O=C([O])C(O)C(=O)CC(OO)C(=O)OO                                      |
| BZo06_BZo06  | 12 | 14 | 12 | 0 | O=CC(O)C(O)C1OC1C(=O)(OO(C(=O)C1OC1C(O)C(O)C=O))                    |
| BZo06_BZo08  | 12 | 14 | 14 | 0 | O=CC(O)C(O)C1OC1C(=O)(OO(C(C(O)C(O)C1OC1C(OO)=O)=O))                |
| BZo06_BZo010 | 12 | 14 | 16 | 0 | O=CC(O)C(O)C1OC1C(=O)(OO(C(C(=O)OO)C(=O)C(O)C(O)C(OO)=O))           |
| BZo06_BZeo05 | 12 | 14 | 11 | 0 | O=CC(O)C(O)C1OC1C(=O)(OOC1C2OC2C3OOC1C3(O))                         |
| BZo06_BZeo07 | 12 | 14 | 13 | 0 | O=CC(O)C(O)C1OC1C(=O)(OO(C(=O)C(O)C(O)C(OO)C=C=O))                  |
| BZo06_BZeo09 | 12 | 14 | 15 | 0 | O=CC(O)C(O)C1OC1C(=O)(OO(C(C(O)C(=O)CC(OO)C(=O)OO)=O))              |
| BZo06_C5e05  | 11 | 14 | 11 | 0 | O=CC(O)C(O)C1OC1C(=O)(OO(C(C(O)C(O)C=O)C=O))                        |
| BZo06_C5O6   | 11 | 14 | 12 | 0 | O=CC(O)C(O)C1OC1C(=O)(OO(C(=O)C(O)C(O)C=COO))                       |
| BZo06_C5e07  | 11 | 14 | 13 | 0 | O=CC(O)C(O)C1OC1C(=O)(OO(C(=O)C(O)C(O)C(OO)C=O))                    |
| BZo06_C5O8   | 11 | 14 | 14 | 0 | O=CC(O)C(O)C1OC1C(=O)(OO(C(C(O)C(O)C(O)C(=O)OO)=O))                 |
| BZo06_C5e09  | 11 | 14 | 15 | 0 | O=CC(O)C(O)C1OC1C(=O)(OO(C(C(OO)C(O)C(O)C(OO)=O)=O))                |
| BZo06_BZBI   | 12 | 14 | 10 | 0 | O=CC(O)C(O)C1OC1C(=O)(OOC1C=CC2OOC1C2O)                             |
| BZo06_BZMUa  | 12 | 12 | 10 | 0 | O=CC(O)C(O)C1OC1C(=O)(OOC(=O)C1OC1C=CC=O)                           |
| BZo06_BZMUb  | 12 | 14 | 11 | 0 | O=CC(O)C(O)C1OC1C(=O)(OO(C(C1OC1C=O)C(O)C=O))                       |
| BZo06_C5DI   | 11 | 12 | 9  | 0 | O=CC(O)C(O)C1OC1C(=O)(OO(C(C=O)C=CC=O))                             |
| BZo06_NPHa   | 12 | 13 | 13 | 1 | O=CC(O)C(O)C1OC1C(=O)(OOC1(O)C=CC2OOC1C2ON(=O)=O)                   |
| BZo06_PHEN   | 12 | 14 | 11 | 0 | O=CC(O)C(O)C1OC1C(=O)(OOC1(O)C=CC2OOC1C2O)                          |
| BZo06_MALa   | 10 | 10 | 9  | 0 | O=CC(O)C(O)C1OC1C(=O)(OOC(=O)C=CC=O)                                |
| BZo06_EPX    | 10 | 10 | 10 | 0 | O=CC(O)C(O)C1OC1C(=O)(OOC(=O)C1OC1C=O)                              |
| BZo06_C3DI   | 9  | 10 | 9  | 0 | O=CC(O)C(O)C1OC1C(=O)(OOC(C=O)C=O)                                  |
| BZo06_MALb   | 10 | 12 | 10 | 0 | O=CC(O)C(O)C1OC1C(=O)(OOC(C=O)C(O)C=O)                              |
| BZo06_C6a    | 12 | 12 | 7  | 0 | O=CC(O)C(O)C1OC1C(=O)(OOc1cccc1)                                    |
| BZo06_NBZa   | 10 | 11 | 12 | 1 | O=CC(O)C(O)C1OC1C(=O)(OOC1C(=O)OCC1ON(=O)=O)                        |
| BZo06_BZFU   | 10 | 12 | 10 | 0 | O=CC(O)C(O)C1OC1C(=O)(OOC1C(O)COC1=O)                               |
| BZo06_C3a    | 9  | 10 | 10 | 0 | O=CC(O)C(O)C1OC1C(=O)(OO(C(=O)C(C=O)O))                             |
| BZo06_CATE   | 12 | 12 | 8  | 0 | O=CC(O)C(O)C1OC1C(=O)(OOc1cccc1O)                                   |
| BZo06_C2a    | 8  | 8  | 9  | 0 | O=CC(O)C(O)C1OC1C(=O)(OOC(=O)C=O)                                   |
| BZo06_C2b    | 8  | 10 | 8  | 0 | O=CC(O)C(O)C1OC1C(=O)(OOC=O)                                        |
| BZo06_NPHb   | 12 | 11 | 9  | 1 | O=CC(O)C(O)C1OC1C(=O)(OOc1cccc1N(=O)=O)                             |
| BZo06_NNC    | 12 | 12 | 16 | 2 | O=CC(O)C(O)C1OC1C(=O)(OOC1(O)C(=CC2(OOC1C2ON(=O)=O)N(=O)=O)O)       |
| BZo06_NCAT   | 12 | 13 | 14 | 1 | O=CC(O)C(O)C1OC1C(=O)(OOC1(O)C(=CC2(OOC1C2O)N(=O)=O)O)              |
| BZo06_NBZb   | 12 | 11 | 12 | 1 | O=CC(O)C(O)C1OC1C(=O)(OOC1C(=O)C=CC(=O)C1ON(=O)=O)                  |
| BZo06_PBZ    | 12 | 12 | 10 | 0 | O=CC(O)C(O)C1OC1C(=O)(OOC1C(=O)C=CC(=O)C1O)                         |
| BZo06_MALc   | 10 | 10 | 11 | 0 | O=CC(O)C(O)C1OC1C(=O)(OOC1C(=O)OC(=O)C1O)                           |
| BZo06_NDN    | 12 | 11 | 17 | 3 | O=CC(O)C(O)C1OC1C(=O)(OOC1(O)C(=CC2(OOC1C2ON(=O)=O)N(=O)=O)N(=O)=O) |
| BZo06_DNP    | 12 | 12 | 15 | 2 | O=CC(O)C(O)C1OC1C(=O)(OOC1(O)C(=CC2(OOC1C2O)N(=O)=O)N(=O)=O)        |
| BZo06_C2c    | 8  | 10 | 9  | 0 | O=CC(O)C(O)C1OC1C(=O)(OO(C(=O)CO))                                  |
| BZo06_C5a    | 12 | 12 | 11 | 0 | O=CC(O)C(O)C1OC1C(=O)(OO(C(=O)C=CC(=O)C(C=O)O))                     |
| BZo06_C4a    | 11 | 10 | 10 | 0 | O=CC(O)C(O)C1OC1C(=O)(OOC(=O)C=CC(=O)C=O)                           |
| BZo08_BZo08  | 12 | 14 | 16 | 0 | O=C(OO(C(C(O)C(O)C1OC1C(OO)=O)=O))C(O)C(O)C1OC1C(OO)=O              |
| BZo08_BZo010 | 12 | 14 | 18 | 0 | O=C(OO(C(C(=O)OO)C(=O)C(O)C(O)C(OO)=O))C(O)C(O)C1OC1C(OO)=O         |
| BZo08_BZeo05 | 12 | 14 | 13 | 0 | O=C(OOC1C2OC2C3OOC1C3(O))C(O)C(O)C1OC1C(OO)=O                       |
| BZo08_BZeo07 | 12 | 14 | 15 | 0 | O=C(OO(C(=O)C(O)C(O)C(O)C=C=O))C(O)C(O)C1OC1C(OO)=O                 |
| BZo08_BZeo09 | 12 | 14 | 17 | 0 | O=C(OO(C(C(O)C(=O)CC(OO)C(=O)OO)=O))C(O)C(O)C1OC1C(OO)=O            |
| BZo08_C5e05  | 11 | 14 | 13 | 0 | O=C(OO(C(C(O)C(O)C=O)C=O))C(O)C(O)C1OC1C(OO)=O                      |
| BZo08_C5O6   | 11 | 14 | 14 | 0 | O=C(OO(C(=O)C(O)C(O)C=COO))C(O)C(O)C1OC1C(OO)=O                     |
| BZo08_C5e07  | 11 | 14 | 15 | 0 | O=C(OO(C(=O)C(O)C(O)C(OO)C=O))C(O)C(O)C1OC1C(OO)=O                  |
| BZo08_C5O8   | 11 | 14 | 16 | 0 | O=C(OO(C(C(O)C(O)C(=O)OO)=O))C(O)C(O)C1OC1C(OO)=O                   |
| BZo08_C5e09  | 11 | 14 | 17 | 0 | O=C(OO(C(C(OO)C(O)C(O)C(OO)=O))C(O)C(O)C1OC1C(OO)=O                 |
| BZo08_BZBI   | 12 | 14 | 12 | 0 | O=C(OOC1C=CC2OOC1C2O)C(O)C(O)C1OC1C(OO)=O                           |
| BZo08_BZMUa  | 12 | 12 | 12 | 0 | O=C(OOC(=O)C1OC1C=CC=O)C(O)C(O)C1OC1C(OO)=O                         |
| BZo08_BZMUb  | 12 | 14 | 13 | 0 | O=C(OO(C(C1OC1C=O)C(O)C=O))C(O)C(O)C1OC1C(OO)=O                     |
| BZo08_C5DI   | 11 | 12 | 11 | 0 | O=C(OO(C(C=O)C=CC=O))C(O)C(O)C1OC1C(OO)=O                           |
| BZo08_NPHa   | 12 | 13 | 15 | 1 | O=C(OOC1(O)C=CC2OOC1C2ON(=O)=O)C(O)C(O)C1OC1C(OO)=O                 |
| BZo08_PHEN   | 12 | 14 | 13 | 0 | O=C(OOC1(O)C=CC2OOC1C2O)C(O)C(O)C1OC1C(OO)=O                        |
| BZo08_MALa   | 10 | 10 | 11 | 0 | O=C(OOC(=O)C=CC=O)C(O)C(O)C1OC1C(OO)=O                              |
| BZo08_EPX    | 10 | 10 | 12 | 0 | O=C(OOC(=O)C1OC1C=O)C(O)C(O)C1OC1C(OO)=O                            |
| BZo08_C3DI   | 9  | 10 | 11 | 0 | O=C(OOC(C=O)C=O)C(O)C(O)C1OC1C(OO)=O                                |
| BZo08_MALb   | 10 | 12 | 12 | 0 | O=C(OOC(C=O)C(O)C=O)C(O)C(O)C1OC1C(OO)=O                            |
| BZo08_C6a    | 12 | 12 | 9  | 0 | O=C(OOC1cccc1)C(O)C(O)C1OC1C(OO)=O                                  |
| BZo08_NBZa   | 10 | 11 | 14 | 1 | O=C(OOC1C(=O)OCC1ON(=O)=O)C(O)C(O)C1OC1C(OO)=O                      |
| BZo08_BZFU   | 10 | 12 | 12 | 0 | O=C(OOC1C(O)COC1=O)C(O)C(O)C1OC1C(OO)=O                             |
| BZo08_C3a    | 9  | 10 | 12 | 0 | O=C(OO(C(=O)C(C=O)O))C(O)C(O)C1OC1C(OO)=O                           |
| BZo08_CATE   | 12 | 12 | 10 | 0 | O=C(OOC1cccc1O)C(O)C(O)C1OC1C(OO)=O                                 |

|               |    |    |    |   |                                                                               |
|---------------|----|----|----|---|-------------------------------------------------------------------------------|
| BZo08_C2a     | 8  | 8  | 11 | 0 | O=C(OOC(=O)C(=O)C(O)C(O)C1OC1C(OO)=O                                          |
| BZo08_C2b     | 8  | 10 | 10 | 0 | O=C(OOCC=O)C(O)C(O)C1OC1C(OO)=O                                               |
| BZo08_NPHb    | 12 | 11 | 11 | 1 | O=C(OOC1cccc1N(=O)=O)C(O)C(O)C1OC1C(OO)=O                                     |
| BZo08_NNC     | 12 | 12 | 18 | 2 | O=C(OOC1(O)C(=CC2(OOC1C2ON(=O)=O)N(=O)=O)O)C(O)C(O)C1OC1C(OO)=O               |
| BZo08_NCAT    | 12 | 13 | 16 | 1 | O=C(OOC1(O)C(=CC2(OOC1C2O)N(=O)=O)O)C(O)C(O)C1OC1C(OO)=O                      |
| BZo08_NBZb    | 12 | 11 | 14 | 1 | O=C(OOC1C(=O)C=CC(=O)C1ON(=O)=O)C(O)C(O)C1OC1C(OO)=O                          |
| BZo08_PBZ     | 12 | 12 | 12 | 0 | O=C(OOC1C(=O)C=CC(=O)C1O)C(O)C(O)C1OC1C(OO)=O                                 |
| BZo08_MALc    | 10 | 10 | 13 | 0 | O=C(OOC1C(=O)OC(=O)C1O)C(O)C(O)C1OC1C(OO)=O                                   |
| BZo08_NDN     | 12 | 11 | 19 | 3 | O=C(OOC1(O)C(=CC2(OOC1C2ON(=O)=O)N(=O)=O)N(=O)=O)C(O)C(O)C1OC1C(OO)=O         |
| BZo08_DNP     | 12 | 12 | 17 | 2 | O=C(OOC1(O)C(=CC2(OOC1C2O)N(=O)=O)N(=O)=O)C(O)C(O)C1OC1C(OO)=O                |
| BZo08_C2c     | 8  | 10 | 11 | 0 | O=C(OOC(=O)CO)C(O)C(O)C1OC1C(OO)=O                                            |
| BZo08_C5a     | 12 | 12 | 13 | 0 | O=C(OOC(=O)C=CC(=O)C(C=O)O)C(O)C(O)C1OC1C(OO)=O                               |
| BZo08_C4a     | 11 | 10 | 12 | 0 | O=C(OOC(=O)C=CC(=O)C(=O)C(O)C(O)C1OC1C(OO)=O                                  |
| BZo010_BZo010 | 12 | 14 | 20 | 0 | O=C(OOC(O)C(O)C(O)C(=O)C(OOC(C(=O)OO)C(=O)C(O)C(O)C(OO)=O))C(=O)OO            |
| BZo010_BZeo05 | 12 | 14 | 15 | 0 | O=C(OOC(O)C(O)C(O)C(=O)C(OOC1C2OC2C3OOC1C3(O))C(=O)OO                         |
| BZo010_BZeo07 | 12 | 14 | 17 | 0 | O=C(OOC(O)C(O)C(O)C(=O)C(OOC(C(=O)C(O)C(O)C(OO)C=C=O))C(=O)OO                 |
| BZo010_BZeo09 | 12 | 14 | 19 | 0 | O=C(OOC(O)C(O)C(O)C(=O)C(OOC(C(C(O)C(=O)CC(OO)C(=O)OO)=O))C(=O)OO             |
| BZo010_C5e05  | 11 | 14 | 15 | 0 | O=C(OOC(O)C(O)C(O)C(=O)C(OOC(C(C(O)C(O)C(=O)C(=O)C(=O)OO)C(=O)OO              |
| BZo010_C5O6   | 11 | 14 | 16 | 0 | O=C(OOC(O)C(O)C(O)C(=O)C(OOC(C(=O)C(O)C(O)C=COO))C(=O)OO                      |
| BZo010_C5e07  | 11 | 14 | 17 | 0 | O=C(OOC(O)C(O)C(O)C(=O)C(OOC(C(=O)C(O)C(O)C(OO)C=O))C(=O)OO                   |
| BZo010_C5O8   | 11 | 14 | 18 | 0 | O=C(OOC(O)C(O)C(O)C(=O)C(OOC(C(C(O)C(O)C(O)C(=O)OO)=O))C(=O)OO                |
| BZo010_C5e09  | 11 | 14 | 19 | 0 | O=C(OOC(O)C(O)C(O)C(=O)C(OOC(C(OO)C(O)C(O)C(OO)=O)=O))C(=O)OO                 |
| BZo010_BZBI   | 12 | 14 | 14 | 0 | O=C(OOC(O)C(O)C(O)C(=O)C(OOC1C=CC2OOC1C2O)C(=O)OO                             |
| BZo010_BZMUa  | 12 | 12 | 14 | 0 | O=C(OOC(O)C(O)C(O)C(=O)C(OOC(=O)C1OC1C=CC=O)C(=O)OO                           |
| BZo010_BZMUb  | 12 | 14 | 15 | 0 | O=C(OOC(O)C(O)C(O)C(=O)C(OOC(C1OC1C=O)C(O)C=O))C(=O)OO                        |
| BZo010_C5DI   | 11 | 12 | 13 | 0 | O=C(OOC(O)C(O)C(O)C(=O)C(OOC(C(=O)C=CC=O))C(=O)OO                             |
| BZo010_NPHa   | 12 | 13 | 17 | 1 | O=C(OOC(O)C(O)C(O)C(=O)C(OOC1(O)C=CC2OOC1C2ON(=O)=O)C(=O)OO                   |
| BZo010_PHEN   | 12 | 14 | 15 | 0 | O=C(OOC(O)C(O)C(O)C(=O)C(OOC1(O)C=CC2OOC1C2O)C(=O)OO                          |
| BZo010_MALa   | 10 | 10 | 13 | 0 | O=C(OOC(O)C(O)C(O)C(=O)C(OOC(=O)C=CC=O)C(=O)OO                                |
| BZo010_EPX    | 10 | 10 | 14 | 0 | O=C(OOC(O)C(O)C(O)C(=O)C(OOC(=O)C1OC1C=O)C(=O)OO                              |
| BZo010_C3DI   | 9  | 10 | 13 | 0 | O=C(OOC(O)C(O)C(O)C(=O)C(OOC(C=O)C=O)C(=O)OO                                  |
| BZo010_MALb   | 10 | 12 | 14 | 0 | O=C(OOC(O)C(O)C(O)C(=O)C(OOC(C=O)C(O)C=O)C(=O)OO                              |
| BZo010_C6a    | 12 | 12 | 11 | 0 | O=C(OOC(O)C(O)C(O)C(=O)C(OOC1cccc1)C(=O)OO                                    |
| BZo010_NBZa   | 10 | 11 | 16 | 1 | O=C(OOC(O)C(O)C(O)C(=O)C(OOC1C(=O)OCC1ON(=O)=O)C(=O)OO                        |
| BZo010_BZFU   | 10 | 12 | 14 | 0 | O=C(OOC(O)C(O)C(O)C(=O)C(OOC1C(O)COC1=O)C(=O)OO                               |
| BZo010_C3a    | 9  | 10 | 14 | 0 | O=C(OOC(O)C(O)C(O)C(=O)C(OOC(C(=O)C(C=O)O))C(=O)OO                            |
| BZo010_CATE   | 12 | 12 | 12 | 0 | O=C(OOC(O)C(O)C(O)C(=O)C(OOC1cccc1O)C(=O)OO                                   |
| BZo010_C2a    | 8  | 8  | 13 | 0 | O=C(OOC(O)C(O)C(O)C(=O)C(OOC(=O)C=O)C(=O)OO                                   |
| BZo010_C2b    | 8  | 10 | 12 | 0 | O=C(OOC(O)C(O)C(O)C(=O)C(OOCC=O)C(=O)OO                                       |
| BZo010_NPHb   | 12 | 11 | 13 | 1 | O=C(OOC(O)C(O)C(O)C(=O)C(OOC1cccc1N(=O)=O)C(=O)OO                             |
| BZo010_NNC    | 12 | 12 | 20 | 2 | O=C(OOC(O)C(O)C(O)C(=O)C(OOC1(O)C(=CC2(OOC1C2ON(=O)=O)N(=O)=O)O)C(=O)OO       |
| BZo010_NCAT   | 12 | 13 | 18 | 1 | O=C(OOC(O)C(O)C(O)C(=O)C(OOC1(O)C(=CC2(OOC1C2O)N(=O)=O)O)C(=O)OO              |
| BZo010_NBZb   | 12 | 11 | 16 | 1 | O=C(OOC(O)C(O)C(O)C(=O)C(OOC1C(=O)C=CC(=O)C1ON(=O)=O)C(=O)OO                  |
| BZo010_PBZ    | 12 | 12 | 14 | 0 | O=C(OOC(O)C(O)C(O)C(=O)C(OOC1C(=O)C=CC(=O)C1O)C(=O)OO                         |
| BZo010_MALc   | 10 | 10 | 15 | 0 | O=C(OOC(O)C(O)C(O)C(=O)C(OOC1C(=O)OC(=O)C1O)C(=O)OO                           |
| BZo010_NDN    | 12 | 11 | 21 | 3 | O=C(OOC(O)C(O)C(O)C(=O)C(OOC1(O)C(=CC2(OOC1C2ON(=O)=O)N(=O)=O)N(=O)=O)C(=O)OO |
| BZo010_DNP    | 12 | 12 | 19 | 2 | O=C(OOC(O)C(O)C(O)C(=O)C(OOC1(O)C(=CC2(OOC1C2O)N(=O)=O)N(=O)=O)C(=O)OO        |
| BZo010_C2c    | 8  | 10 | 13 | 0 | O=C(OOC(O)C(O)C(O)C(=O)C(OOC(C(=O)CO)C(=O)OO                                  |
| BZo010_C5a    | 12 | 12 | 15 | 0 | O=C(OOC(O)C(O)C(O)C(=O)C(OOC(C(=O)C=CC(=O)C(C=O)O))C(=O)OO                    |
| BZo010_C4a    | 11 | 10 | 14 | 0 | O=C(OOC(O)C(O)C(O)C(=O)C(OOC(=O)C=CC(=O)C=O)C(=O)OO                           |
| BZeo05_BZeo05 | 12 | 14 | 10 | 0 | O(C1C2OC2C3OOC1C3(O))OC1C2OC2C3OOC1C3(O)                                      |
| BZeo05_BZeo07 | 12 | 14 | 12 | 0 | O=C=CC(OO)C(O)C(O)C(=O)(OOC1C2OC2C3OOC1C3(O))                                 |
| BZeo05_BZeo09 | 12 | 14 | 14 | 0 | O=C(OOC1C2OC2C3OOC1C3(O))C(O)C(=O)CC(OO)C(=O)OO                               |
| BZeo05_C5e05  | 11 | 14 | 10 | 0 | O=CC(OOC1C2OC2C3OOC1C3(O))C(O)C(O)C=O                                         |
| BZeo05_C5O6   | 11 | 14 | 11 | 0 | OOC=CC(O)C(O)C(=O)(OOC1C2OC2C3OOC1C3(O))                                      |
| BZeo05_C5e07  | 11 | 14 | 12 | 0 | O=CC(OO)C(O)C(O)C(=O)(OOC1C2OC2C3OOC1C3(O))                                   |
| BZeo05_C5O8   | 11 | 14 | 13 | 0 | O=C(OOC1C2OC2C3OOC1C3(O))C(O)C(O)C(O)C(=O)OO                                  |
| BZeo05_C5e09  | 11 | 14 | 14 | 0 | O=C(OOC1C2OC2C3OOC1C3(O))C(OO)C(O)C(O)C(OO)=O                                 |
| BZeo05_BZBI   | 12 | 14 | 9  | 0 | O(C1C2OC2C3OOC1C3(O))OC1C=CC2OOC1C2O                                          |
| BZeo05_BZMUa  | 12 | 12 | 9  | 0 | O(C1C2OC2C3OOC1C3(O))OC(=O)C1OC1C=CC=O                                        |
| BZeo05_BZMUb  | 12 | 14 | 10 | 0 | O=CC(O)C(OOC1C2OC2C3OOC1C3(O))C1OC1C=O                                        |
| BZeo05_C5DI   | 11 | 12 | 8  | 0 | O=CC=CC(OOC1C2OC2C3OOC1C3(O))C=O                                              |
| BZeo05_NPHa   | 12 | 13 | 12 | 1 | O(C1C2OC2C3OOC1C3(O))OC1(O)C(=CC2OOC1C2ON(=O)=O)                              |
| BZeo05_PHEN   | 12 | 14 | 10 | 0 | O(C1C2OC2C3OOC1C3(O))OC1(O)C(=CC2OOC1C2O                                      |
| BZeo05_MALa   | 10 | 10 | 8  | 0 | O(C1C2OC2C3OOC1C3(O))OC(=O)C=CC=O                                             |
| BZeo05_EPX    | 10 | 10 | 9  | 0 | O(C1C2OC2C3OOC1C3(O))OC(=O)C1OC1C=O                                           |
| BZeo05_C3DI   | 9  | 10 | 8  | 0 | O(C1C2OC2C3OOC1C3(O))OC(C=O)C=O                                               |
| BZeo05_MALb   | 10 | 12 | 9  | 0 | O(C1C2OC2C3OOC1C3(O))OC(C=O)C(O)C=O                                           |
| BZeo05_C6a    | 12 | 12 | 6  | 0 | O(C1C2OC2C3OOC1C3(O))Oc1cccc1                                                 |
| BZeo05_NBZa   | 10 | 11 | 11 | 1 | O(C1C2OC2C3OOC1C3(O))OC1C(=O)OCC1ON(=O)=O                                     |
| BZeo05_BZFU   | 10 | 12 | 9  | 0 | O(C1C2OC2C3OOC1C3(O))OC1C(O)COC1=O                                            |
| BZeo05_C3a    | 9  | 10 | 9  | 0 | OC(C=O)C(=O)(OOC1C2OC2C3OOC1C3(O))                                            |
| BZeo05_CATE   | 12 | 12 | 7  | 0 | O(C1C2OC2C3OOC1C3(O))Oc1cccc1O                                                |
| BZeo05_C2a    | 8  | 8  | 8  | 0 | O(C1C2OC2C3OOC1C3(O))OC(=O)C=O                                                |
| BZeo05_C2b    | 8  | 10 | 7  | 0 | O(C1C2OC2C3OOC1C3(O))OCC=O                                                    |

|               |    |    |    |   |                                                                       |
|---------------|----|----|----|---|-----------------------------------------------------------------------|
| BZeo05_NPHb   | 12 | 11 | 8  | 1 | O(C1C2OC2C3OOC1C3(O))Oc1ccccc1N(=O)=O                                 |
| BZeo05_NNC    | 12 | 12 | 15 | 2 | O(C1C2OC2C3OOC1C3(O))OC1(O)C(=CC2(OOC1C2ON(=O)=O)N(=O)=O)O            |
| BZeo05_NCAT   | 12 | 13 | 13 | 1 | O(C1C2OC2C3OOC1C3(O))OC1(O)C(=CC2(OOC1C2O)N(=O)=O)O                   |
| BZeo05_NBZb   | 12 | 11 | 11 | 1 | O(C1C2OC2C3OOC1C3(O))OC1C(=O)C=CC(=O)C1ON(=O)=O                       |
| BZeo05_PBZ    | 12 | 12 | 9  | 0 | O(C1C2OC2C3OOC1C3(O))OC1C(=O)C=CC(=O)C1O                              |
| BZeo05_MALc   | 10 | 10 | 10 | 0 | O(C1C2OC2C3OOC1C3(O))OC1C(=O)OC(=O)C1O                                |
| BZeo05_NDN    | 12 | 11 | 16 | 3 | O(C1C2OC2C3OOC1C3(O))OC1(O)C(=CC2(OOC1C2ON(=O)=O)N(=O)=O)N(=O)=O      |
| BZeo05_DNP    | 12 | 12 | 14 | 2 | O(C1C2OC2C3OOC1C3(O))OC1(O)C(=CC2(OOC1C2O)N(=O)=O)N(=O)=O             |
| BZeo05_C2c    | 8  | 10 | 8  | 0 | OCC(=O)(OOC1C2OC2C3OOC1C3(O))                                         |
| BZeo05_C5a    | 12 | 12 | 10 | 0 | OC(C=O)C(=O)C=CC(=O)(OOC1C2OC2C3OOC1C3(O))                            |
| BZeo05_C4a    | 11 | 10 | 9  | 0 | O(C1C2OC2C3OOC1C3(O))OC(=O)C=CC(=O)C=O                                |
| BZeo07_BZeo07 | 12 | 14 | 14 | 0 | O=C=CC(OO)C(O)C(O)C(=O)(OO(C(=O)C(O)C(O)C(O)C(O)C=O))                 |
| BZeo07_BZeo09 | 12 | 14 | 16 | 0 | O=C=CC(OO)C(O)C(O)C(=O)(OO(C(C(O)C(=O)CC(OO)C(=O)OO)=O))              |
| BZeo07_C5e05  | 11 | 14 | 12 | 0 | O=C=CC(OO)C(O)C(O)C(=O)(OO(C(C(O)C(O)C=O)C=O))                        |
| BZeo07_C5O6   | 11 | 14 | 13 | 0 | O=C=CC(OO)C(O)C(O)C(=O)(OO(C(=O)C(O)C(O)C=CO))                        |
| BZeo07_C5e07  | 11 | 14 | 14 | 0 | O=C=CC(OO)C(O)C(O)C(=O)(OO(C(=O)C(O)C(O)C(OO)C=O))                    |
| BZeo07_C5O8   | 11 | 14 | 15 | 0 | O=C=CC(OO)C(O)C(O)C(=O)(OO(C(C(O)C(O)C(O)C(=O)OO)=O))                 |
| BZeo07_C5e09  | 11 | 14 | 16 | 0 | O=C=CC(OO)C(O)C(O)C(=O)(OO(C(C(OO)C(O)C(O)C(OO)=O)=O))                |
| BZeo07_BZBI   | 12 | 14 | 11 | 0 | O=C=CC(OO)C(O)C(O)C(=O)(OOC1C=CC2OOC1C2O)                             |
| BZeo07_BZMuA  | 12 | 12 | 11 | 0 | O=C=CC(OO)C(O)C(O)C(=O)(OOC(=O)C1OC1C=CC=O)                           |
| BZeo07_BZMuB  | 12 | 14 | 12 | 0 | O=C=CC(OO)C(O)C(O)C(=O)(OO(C(C1OC1C=O)C(O)C=O))                       |
| BZeo07_C5DI   | 11 | 12 | 10 | 0 | O=C=CC(OO)C(O)C(O)C(=O)(OO(C(C=O)C=CC=O))                             |
| BZeo07_NPHa   | 12 | 13 | 14 | 1 | O=C=CC(OO)C(O)C(O)C(=O)(OOC1(O)C=CC2OOC1C2ON(=O)=O)                   |
| BZeo07_PHEN   | 12 | 14 | 12 | 0 | O=C=CC(OO)C(O)C(O)C(=O)(OOC1(O)C=CC2OOC1C2O)                          |
| BZeo07_MALa   | 10 | 10 | 10 | 0 | O=C=CC(OO)C(O)C(O)C(=O)(OOC(=O)C=CC=O)                                |
| BZeo07_EPX    | 10 | 10 | 11 | 0 | O=C=CC(OO)C(O)C(O)C(=O)(OOC(=O)C1OC1C=O)                              |
| BZeo07_C3DI   | 9  | 10 | 10 | 0 | O=C=CC(OO)C(O)C(O)C(=O)(OOC(C=O)C=O)                                  |
| BZeo07_MALb   | 10 | 12 | 11 | 0 | O=C=CC(OO)C(O)C(O)C(=O)(OOC(C=O)C(O)C=O)                              |
| BZeo07_C6a    | 12 | 12 | 8  | 0 | O=C=CC(OO)C(O)C(O)C(=O)(Ooc1ccccc1)                                   |
| BZeo07_NBZa   | 10 | 11 | 13 | 1 | O=C=CC(OO)C(O)C(O)C(=O)(OOC1C(=O)OCC1ON(=O)=O)                        |
| BZeo07_BZFU   | 10 | 12 | 11 | 0 | O=C=CC(OO)C(O)C(O)C(=O)(OOC1C(O)COC1=O)                               |
| BZeo07_C3a    | 9  | 10 | 11 | 0 | O=C=CC(OO)C(O)C(O)C(=O)(OO(C(=O)C(C=O)O))                             |
| BZeo07_CATE   | 12 | 12 | 9  | 0 | O=C=CC(OO)C(O)C(O)C(=O)(Ooc1ccccc1O)                                  |
| BZeo07_C2a    | 8  | 8  | 10 | 0 | O=C=CC(OO)C(O)C(O)C(=O)(OOC(=O)C=O)                                   |
| BZeo07_C2b    | 8  | 10 | 9  | 0 | O=C=CC(OO)C(O)C(O)C(=O)(OOC(=O)C=O)                                   |
| BZeo07_NPHb   | 12 | 11 | 10 | 1 | O=C=CC(OO)C(O)C(O)C(=O)(Ooc1ccccc1N(=O)=O)                            |
| BZeo07_NNC    | 12 | 12 | 17 | 2 | O=C=CC(OO)C(O)C(O)C(=O)(OOC1(O)C(=CC2(OOC1C2ON(=O)=O)N(=O)=O)O)       |
| BZeo07_NCAT   | 12 | 13 | 15 | 1 | O=C=CC(OO)C(O)C(O)C(=O)(OOC1(O)C(=CC2(OOC1C2O)N(=O)=O)O)              |
| BZeo07_NBZb   | 12 | 11 | 13 | 1 | O=C=CC(OO)C(O)C(O)C(=O)(OOC1C(=O)C=CC(=O)C1ON(=O)=O)                  |
| BZeo07_PBZ    | 12 | 12 | 11 | 0 | O=C=CC(OO)C(O)C(O)C(=O)(OOC1C(=O)C=CC(=O)C1O)                         |
| BZeo07_MALc   | 10 | 10 | 12 | 0 | O=C=CC(OO)C(O)C(O)C(=O)(OOC1C(=O)OC(=O)C1O)                           |
| BZeo07_NDN    | 12 | 11 | 18 | 3 | O=C=CC(OO)C(O)C(O)C(=O)(OOC1(O)C(=CC2(OOC1C2ON(=O)=O)N(=O)=O)N(=O)=O) |
| BZeo07_DNP    | 12 | 12 | 16 | 2 | O=C=CC(OO)C(O)C(O)C(=O)(OOC1(O)C(=CC2(OOC1C2O)N(=O)=O)N(=O)=O)        |
| BZeo07_C2c    | 8  | 10 | 10 | 0 | O=C=CC(OO)C(O)C(O)C(=O)(OO(C(=O)CO))                                  |
| BZeo07_C5a    | 12 | 12 | 12 | 0 | O=C=CC(OO)C(O)C(O)C(=O)(OO(C(=O)C=CC(=O)C(C=O)O))                     |
| BZeo07_C4a    | 11 | 10 | 11 | 0 | O=C=CC(OO)C(O)C(O)C(=O)(OOC(=O)C=CC(=O)C=O)                           |
| BZeo09_BZeo09 | 12 | 14 | 18 | 0 | O=C(OO(C(C(O)C(=O)CC(OO)C(=O)OO)=O))C(O)C(=O)CC(OO)C(=O)OO            |
| BZeo09_C5e05  | 11 | 14 | 14 | 0 | O=C(OO(C(C(O)C(O)C(=O)C=O))C(O)C(=O)CC(OO)C(=O)OO                     |
| BZeo09_C5O6   | 11 | 14 | 15 | 0 | O=C(OO(C(=O)C(O)C(O)C=CO))C(O)C(=O)CC(OO)C(=O)OO                      |
| BZeo09_C5e07  | 11 | 14 | 16 | 0 | O=C(OO(C(=O)C(O)C(O)C(OO)C=O))C(O)C(=O)CC(OO)C(=O)OO                  |
| BZeo09_C5O8   | 11 | 14 | 17 | 0 | O=C(OO(C(C(O)C(O)C(O)C(=O)OO)=O))C(O)C(=O)CC(OO)C(=O)OO               |
| BZeo09_C5e09  | 11 | 14 | 18 | 0 | O=C(OO(C(C(OO)C(O)C(O)C(OO)=O)=O))C(O)C(=O)CC(OO)C(=O)OO              |
| BZeo09_BZBI   | 12 | 14 | 13 | 0 | O=C(OOC1C=CC2OOC1C2O)C(O)C(=O)CC(OO)C(=O)OO                           |
| BZeo09_BZMuA  | 12 | 12 | 13 | 0 | O=C(OOC(=O)C1OC1C=CC=O)C(O)C(=O)CC(OO)C(=O)OO                         |
| BZeo09_BZMuB  | 12 | 14 | 14 | 0 | O=C(OO(C(C1OC1C=O)C(O)C=O))C(O)C(=O)CC(OO)C(=O)OO                     |
| BZeo09_C5DI   | 11 | 12 | 12 | 0 | O=C(OO(C(C=O)C=CC=O))C(O)C(=O)CC(OO)C(=O)OO                           |
| BZeo09_NPHa   | 12 | 13 | 16 | 1 | O=C(OOC1(O)C=CC2OOC1C2ON(=O)=O)C(O)C(=O)CC(OO)C(=O)OO                 |
| BZeo09_PHEN   | 12 | 14 | 14 | 0 | O=C(OOC1(O)C=CC2OOC1C2O)C(O)C(=O)CC(OO)C(=O)OO                        |
| BZeo09_MALa   | 10 | 10 | 12 | 0 | O=C(OOC(=O)C=CC=O)C(O)C(=O)CC(OO)C(=O)OO                              |
| BZeo09_EPX    | 10 | 10 | 13 | 0 | O=C(OOC(=O)C1OC1C=O)C(O)C(=O)CC(OO)C(=O)OO                            |
| BZeo09_C3DI   | 9  | 10 | 12 | 0 | O=C(OOC(C=O)C=O)C(O)C(=O)CC(OO)C(=O)OO                                |
| BZeo09_MALb   | 10 | 12 | 13 | 0 | O=C(OOC(C=O)C(O)C=O)C(O)C(=O)CC(OO)C(=O)OO                            |
| BZeo09_C6a    | 12 | 12 | 10 | 0 | O=C(Ooc1ccccc1)C(O)C(=O)CC(OO)C(=O)OO                                 |
| BZeo09_NBZa   | 10 | 11 | 15 | 1 | O=C(OOC1C(=O)OCC1ON(=O)=O)C(O)C(=O)CC(OO)C(=O)OO                      |
| BZeo09_BZFU   | 10 | 12 | 13 | 0 | O=C(OOC1C(O)COC1=O)C(O)C(=O)CC(OO)C(=O)OO                             |
| BZeo09_C3a    | 9  | 10 | 13 | 0 | O=C(OO(C(=O)C(C=O)O))C(O)C(=O)CC(OO)C(=O)OO                           |
| BZeo09_CATE   | 12 | 12 | 11 | 0 | O=C(Ooc1ccccc1O)C(O)C(=O)CC(OO)C(=O)OO                                |
| BZeo09_C2a    | 8  | 8  | 12 | 0 | O=C(OOC(=O)C=O)C(O)C(=O)CC(OO)C(=O)OO                                 |
| BZeo09_C2b    | 8  | 10 | 11 | 0 | O=C(OOCC=O)C(O)C(=O)CC(OO)C(=O)OO                                     |
| BZeo09_NPHb   | 12 | 11 | 12 | 1 | O=C(Ooc1ccccc1N(=O)=O)C(O)C(=O)CC(OO)C(=O)OO                          |
| BZeo09_NNC    | 12 | 12 | 19 | 2 | O=C(OOC1(O)C(=CC2(OOC1C2ON(=O)=O)N(=O)=O)O)C(O)C(=O)CC(OO)C(=O)OO     |
| BZeo09_NCAT   | 12 | 13 | 17 | 1 | O=C(OOC1(O)C(=CC2(OOC1C2O)N(=O)=O)O)C(O)C(=O)CC(OO)C(=O)OO            |
| BZeo09_NBZb   | 12 | 11 | 15 | 1 | O=C(OOC1C(=O)C=CC(=O)C1ON(=O)=O)C(O)C(=O)CC(OO)C(=O)OO                |
| BZeo09_PBZ    | 12 | 12 | 13 | 0 | O=C(OOC1C(=O)C=CC(=O)C1O)C(O)C(=O)CC(OO)C(=O)OO                       |
| BZeo09_MALc   | 10 | 10 | 14 | 0 | O=C(OOC1C(=O)OC(=O)C1O)C(O)C(=O)CC(OO)C(=O)OO                         |

|             |    |    |    |   |                                                                         |
|-------------|----|----|----|---|-------------------------------------------------------------------------|
| BZeo09_NDN  | 12 | 11 | 20 | 3 | O=C(OOC1(O)C(=CC2(OOC1C2ON(=O)=O)N(=O)=O)N(=O)=O)C(O)C(=O)CC(OO)C(=O)OO |
| BZeo09_DNP  | 12 | 12 | 18 | 2 | O=C(OOC1(O)C(=CC2(OOC1C2O)N(=O)=O)N(=O)=O)C(O)C(=O)CC(OO)C(=O)OO        |
| BZeo09_C2c  | 8  | 10 | 12 | 0 | O=C(OO(C(=O)CO))C(O)C(=O)CC(OO)C(=O)OO                                  |
| BZeo09_C5a  | 12 | 12 | 14 | 0 | O=C(OO(C(=O)C=CC(=O)C(=O)O))C(O)C(=O)CC(OO)C(=O)OO                      |
| BZeo09_C4a  | 11 | 10 | 13 | 0 | O=C(OOC(=O)C=CC(=O)C=O)C(O)C(=O)CC(OO)C(=O)OO                           |
| C5e05_C5e05 | 10 | 14 | 10 | 0 | O=CC(OO(C(C(O)C(O)C=O)C=O)C(O)C(O)C=O                                   |
| C5e05_C5O6  | 10 | 14 | 11 | 0 | O=CC(OO(C(=O)C(O)C(O)C=C(OO))C(O)C(O)C=O                                |
| C5e05_C5e07 | 10 | 14 | 12 | 0 | O=CC(OO(C(=O)C(O)C(O)C(OO)C=O)C(O)C(O)C=O                               |
| C5e05_C5O8  | 10 | 14 | 13 | 0 | O=CC(OO(C(C(O)C(O)C(O)C(=O)OO)=O)C(O)C(O)C=O                            |
| C5e05_C5e09 | 10 | 14 | 14 | 0 | O=CC(OO(C(C(OO)C(O)C(O)C(OO)=O)=O)C(O)C(O)C=O                           |
| C5e05_BZBI  | 11 | 14 | 9  | 0 | O=CC(OOC1C=CC2OOC1C2O)C(O)C(O)C=O                                       |
| C5e05_BZMUa | 11 | 12 | 9  | 0 | O=CC(OOC(=O)C1OC1C=CC=O)C(O)C(O)C=O                                     |
| C5e05_BZMUb | 11 | 14 | 10 | 0 | O=CC(OO(C(C1OC1C=O)C(O)C=O))C(O)C(O)C=O                                 |
| C5e05_C5DI  | 10 | 12 | 8  | 0 | O=CC(OO(C(C=O)C=CC=O)C(O)C(O)C=O                                        |
| C5e05_NPHa  | 11 | 13 | 12 | 1 | O=CC(OOC1(O)C=CC2OOC1C2ON(=O)=O)C(O)C(O)C=O                             |
| C5e05_PHEN  | 11 | 14 | 10 | 0 | O=CC(OOC1(O)C=CC2OOC1C2O)C(O)C(O)C=O                                    |
| C5e05_MALa  | 9  | 10 | 8  | 0 | O=CC(OOC(=O)C=CC=O)C(O)C(O)C=O                                          |
| C5e05_EPX   | 9  | 10 | 9  | 0 | O=CC(OOC(=O)C1OC1C=O)C(O)C(O)C=O                                        |
| C5e05_C3DI  | 8  | 10 | 8  | 0 | O=CC(OOC(C=O)C=O)C(O)C(O)C=O                                            |
| C5e05_MALb  | 9  | 12 | 9  | 0 | O=CC(OOC(C=O)C(O)C=O)C(O)C(O)C=O                                        |
| C5e05_C6a   | 11 | 12 | 6  | 0 | O=CC(OOc1cccc1)C(O)C(O)C=O                                              |
| C5e05_NBZa  | 9  | 11 | 11 | 1 | O=CC(OOC1C(=O)OCC1ON(=O)=O)C(O)C(O)C=O                                  |
| C5e05_BZFU  | 9  | 12 | 9  | 0 | O=CC(OOC1C(O)COC1=O)C(O)C(O)C=O                                         |
| C5e05_C3a   | 8  | 10 | 9  | 0 | O=CC(OO(C(=O)C(C=O)O))C(O)C(O)C=O                                       |
| C5e05_CATE  | 11 | 12 | 7  | 0 | O=CC(OOc1cccc1O)C(O)C(O)C=O                                             |
| C5e05_C2a   | 7  | 8  | 8  | 0 | O=CC(OOC(=O)C=O)C(O)C(O)C=O                                             |
| C5e05_C2b   | 7  | 10 | 7  | 0 | O=CC(OOCC=O)C(O)C(O)C=O                                                 |
| C5e05_NPHb  | 11 | 11 | 8  | 1 | O=CC(OOc1cccc1N(=O)=O)C(O)C(O)C=O                                       |
| C5e05_NNC   | 11 | 12 | 15 | 2 | O=CC(OOC1(O)C(=CC2(OOC1C2ON(=O)=O)N(=O)=O)O)C(O)C(O)C=O                 |
| C5e05_NCAT  | 11 | 13 | 13 | 1 | O=CC(OOC1(O)C(=CC2(OOC1C2O)N(=O)=O)O)C(O)C(O)C=O                        |
| C5e05_NBZb  | 11 | 11 | 11 | 1 | O=CC(OOC1C(=O)C=CC(=O)C1ON(=O)=O)C(O)C(O)C=O                            |
| C5e05_PBZ   | 11 | 12 | 9  | 0 | O=CC(OOC1C(=O)C=CC(=O)C1O)C(O)C(O)C=O                                   |
| C5e05_MALc  | 9  | 10 | 10 | 0 | O=CC(OOC1C(=O)OC(=O)C1O)C(O)C(O)C=O                                     |
| C5e05_NDN   | 11 | 11 | 16 | 3 | O=CC(OOC1(O)C(=CC2(OOC1C2ON(=O)=O)N(=O)=O)N(=O)=O)C(O)C(O)C=O           |
| C5e05_DNP   | 11 | 12 | 14 | 2 | O=CC(OOC1(O)C(=CC2(OOC1C2O)N(=O)=O)N(=O)=O)C(O)C(O)C=O                  |
| C5e05_C2c   | 7  | 10 | 8  | 0 | O=CC(OO(C(=O)CO))C(O)C(O)C=O                                            |
| C5e05_C5a   | 11 | 12 | 10 | 0 | O=CC(OO(C(=O)C=CC(=O)C(C=O)O))C(O)C(O)C=O                               |
| C5e05_C4a   | 10 | 10 | 9  | 0 | O=CC(OOC(=O)C=CC(=O)C=O)C(O)C(O)C=O                                     |
| C5O6_C5O6   | 10 | 14 | 12 | 0 | OOC=CC(O)C(O)C(=O)(OO(C(=O)C(O)C(O)C=C(OO)))                            |
| C5O6_C5e07  | 10 | 14 | 13 | 0 | OOC=CC(O)C(O)C(=O)(OO(C(=O)C(O)C(O)C(OO)C=O))                           |
| C5O6_C5O8   | 10 | 14 | 14 | 0 | OOC=CC(O)C(O)C(=O)(OO(C(C(O)C(O)C(=O)OO)=O))                            |
| C5O6_C5e09  | 10 | 14 | 15 | 0 | OOC=CC(O)C(O)C(=O)(OOC(C(OO)C(O)C(O)C(OO)=O))                           |
| C5O6_BZBI   | 11 | 14 | 10 | 0 | OOC=CC(O)C(O)C(=O)(OOC1C=CC2OOC1C2O)                                    |
| C5O6_BZMUa  | 11 | 12 | 10 | 0 | OOC=CC(O)C(O)C(=O)(OOC(=O)C1OC1C=CC=O)                                  |
| C5O6_BZMUb  | 11 | 14 | 11 | 0 | OOC=CC(O)C(O)C(=O)(OO(C(C1OC1C=O)C(O)C=O))                              |
| C5O6_C5DI   | 10 | 12 | 9  | 0 | OOC=CC(O)C(O)C(=O)(OOC(C=O)C=CC=O)                                      |
| C5O6_NPHa   | 11 | 13 | 13 | 1 | OOC=CC(O)C(O)C(=O)(OOC1(O)C=CC2OOC1C2ON(=O)=O)                          |
| C5O6_PHEN   | 11 | 14 | 11 | 0 | OOC=CC(O)C(O)C(=O)(OOC1(O)C=CC2OOC1C2O)                                 |
| C5O6_MALa   | 9  | 10 | 9  | 0 | OOC=CC(O)C(O)C(=O)(OOC(=O)C=CC=O)                                       |
| C5O6_EPX    | 9  | 10 | 10 | 0 | OOC=CC(O)C(O)C(=O)(OOC(=O)C1OC1C=O)                                     |
| C5O6_C3DI   | 8  | 10 | 9  | 0 | OOC=CC(O)C(O)C(=O)(OOC(C=O)C=O)                                         |
| C5O6_MALb   | 9  | 12 | 10 | 0 | OOC=CC(O)C(O)C(=O)(OOC(C=O)C(O)C=O)                                     |
| C5O6_C6a    | 11 | 12 | 7  | 0 | OOC=CC(O)C(O)C(=O)(OOc1cccc1)                                           |
| C5O6_NBZa   | 9  | 11 | 12 | 1 | OOC=CC(O)C(O)C(=O)(OOC1C(=O)OCC1ON(=O)=O)                               |
| C5O6_BZFU   | 9  | 12 | 10 | 0 | OOC=CC(O)C(O)C(=O)(OOC1C(O)COC1=O)                                      |
| C5O6_C3a    | 8  | 10 | 10 | 0 | OOC=CC(O)C(O)C(=O)(OO(C(=O)C(C=O)O))                                    |
| C5O6_CATE   | 11 | 12 | 8  | 0 | OOC=CC(O)C(O)C(=O)(OOc1cccc1O)                                          |
| C5O6_C2a    | 7  | 8  | 9  | 0 | OOC=CC(O)C(O)C(=O)(OOC(=O)C=O)                                          |
| C5O6_C2b    | 7  | 10 | 8  | 0 | OOC=CC(O)C(O)C(=O)(OOC=O)                                               |
| C5O6_NPHb   | 11 | 11 | 9  | 1 | OOC=CC(O)C(O)C(=O)(OOc1cccc1N(=O)=O)                                    |
| C5O6_NNC    | 11 | 12 | 16 | 2 | OOC=CC(O)C(O)C(=O)(OOC1(O)C(=CC2(OOC1C2ON(=O)=O)N(=O)=O)O)              |
| C5O6_NCAT   | 11 | 13 | 14 | 1 | OOC=CC(O)C(O)C(=O)(OOC1(O)C(=CC2(OOC1C2O)N(=O)=O)O)                     |
| C5O6_NBZb   | 11 | 11 | 12 | 1 | OOC=CC(O)C(O)C(=O)(OOC1C(=O)C=CC(=O)C1ON(=O)=O)                         |
| C5O6_PBZ    | 11 | 12 | 10 | 0 | OOC=CC(O)C(O)C(=O)(OOC1C(=O)C=CC(=O)C1O)                                |
| C5O6_MALc   | 9  | 10 | 11 | 0 | OOC=CC(O)C(O)C(=O)(OOC1C(=O)OC(=O)C1O)                                  |
| C5O6_NDN    | 11 | 11 | 17 | 3 | OOC=CC(O)C(O)C(=O)(OOC1(O)C(=CC2(OOC1C2ON(=O)=O)N(=O)=O)N(=O)=O)        |
| C5O6_DNP    | 11 | 12 | 15 | 2 | OOC=CC(O)C(O)C(=O)(OOC1(O)C(=CC2(OOC1C2O)N(=O)=O)N(=O)=O)               |
| C5O6_C2c    | 7  | 10 | 9  | 0 | OOC=CC(O)C(O)C(=O)(OOC(C(=O)CO))                                        |
| C5O6_C5a    | 11 | 12 | 11 | 0 | OOC=CC(O)C(O)C(=O)(OO(C(=O)C=CC(=O)C(C=O)O))                            |
| C5O6_C4a    | 10 | 10 | 10 | 0 | OOC=CC(O)C(O)C(=O)(OOC(=O)C=CC(=O)C=O)                                  |
| C5e07_C5e07 | 10 | 14 | 14 | 0 | O=CC(OO)C(O)C(O)C(=O)(OO(C(=O)C(O)C(O)C(OO)C=O))                        |
| C5e07_C5O8  | 10 | 14 | 15 | 0 | O=CC(OO)C(O)C(O)C(=O)(OO(C(C(O)C(O)C(O)C(=O)OO)=O))                     |
| C5e07_C5e09 | 10 | 14 | 16 | 0 | O=CC(OO)C(O)C(O)C(=O)(OO(C(C(OO)C(O)C(O)C(OO)=O))                       |
| C5e07_BZBI  | 11 | 14 | 11 | 0 | O=CC(OO)C(O)C(O)C(=O)(OOC1C=CC2OOC1C2O)                                 |
| C5e07_BZMUa | 11 | 12 | 11 | 0 | O=CC(OO)C(O)C(O)C(=O)(OOC(=O)C1OC1C=CC=O)                               |

|             |    |    |    |   |                                                                      |
|-------------|----|----|----|---|----------------------------------------------------------------------|
| C5e07_BZMUb | 11 | 14 | 12 | 0 | O=CC(OO)C(O)C(O)C(=O)(OO(C(C1OC1C=O)C(O)C=O))                        |
| C5e07_C5DI  | 10 | 12 | 10 | 0 | O=CC(OO)C(O)C(O)C(=O)(OO(C(C=O)C=CC=O))                              |
| C5e07_NPHa  | 11 | 13 | 14 | 1 | O=CC(OO)C(O)C(O)C(=O)(OOC1(O)C=CC2OOC1C2ON(=O)=O)                    |
| C5e07_PHEN  | 11 | 14 | 12 | 0 | O=CC(OO)C(O)C(O)C(=O)(OOC1(O)C=CC2OOC1C2O)                           |
| C5e07_MALa  | 9  | 10 | 10 | 0 | O=CC(OO)C(O)C(O)C(=O)(OOC(=O)C=CC=O)                                 |
| C5e07_EPX   | 9  | 10 | 11 | 0 | O=CC(OO)C(O)C(O)C(=O)(OOC(=O)C1OC1C=O)                               |
| C5e07_C3DI  | 8  | 10 | 10 | 0 | O=CC(OO)C(O)C(O)C(=O)(OOC(C=O)C=O)                                   |
| C5e07_MALb  | 9  | 12 | 11 | 0 | O=CC(OO)C(O)C(O)C(=O)(OOC(C=O)C(O)C=O)                               |
| C5e07_C6a   | 11 | 12 | 8  | 0 | O=CC(OO)C(O)C(O)C(=O)(OOC1cccc1)                                     |
| C5e07_NBZa  | 9  | 11 | 13 | 1 | O=CC(OO)C(O)C(O)C(=O)(OOC1C(=O)OCC1ON(=O)=O)                         |
| C5e07_BZFU  | 9  | 12 | 11 | 0 | O=CC(OO)C(O)C(O)C(=O)(OOC1C(O)COC1=O)                                |
| C5e07_C3a   | 8  | 10 | 11 | 0 | O=CC(OO)C(O)C(O)C(=O)(OOC(C=O)C(C=O)O))                              |
| C5e07_CATE  | 11 | 12 | 9  | 0 | O=CC(OO)C(O)C(O)C(=O)(OOC1cccc1O)                                    |
| C5e07_C2a   | 7  | 8  | 10 | 0 | O=CC(OO)C(O)C(O)C(=O)(OOC(=O)C=O)                                    |
| C5e07_C2b   | 7  | 10 | 9  | 0 | O=CC(OO)C(O)C(O)C(=O)(OOC=O)                                         |
| C5e07_NPHb  | 11 | 11 | 10 | 1 | O=CC(OO)C(O)C(O)C(=O)(OOC1cccc1N(=O)=O)                              |
| C5e07_NNC   | 11 | 12 | 17 | 2 | O=CC(OO)C(O)C(O)C(=O)(OOC1(O)C(=CC2(OOC1C2ON(=O)=O)N(=O)=O)O)        |
| C5e07_NCAT  | 11 | 13 | 15 | 1 | O=CC(OO)C(O)C(O)C(=O)(OOC1(O)C(=CC2(OOC1C2O)N(=O)=O)O)               |
| C5e07_NBZb  | 11 | 11 | 13 | 1 | O=CC(OO)C(O)C(O)C(=O)(OOC1C(=O)C=CC(=O)C1ON(=O)=O)                   |
| C5e07_PBZ   | 11 | 12 | 11 | 0 | O=CC(OO)C(O)C(O)C(=O)(OOC1C(=O)C=CC(=O)C1O)                          |
| C5e07_MALc  | 9  | 10 | 12 | 0 | O=CC(OO)C(O)C(O)C(=O)(OOC1C(=O)OC(=O)C1O)                            |
| C5e07_NDN   | 11 | 11 | 18 | 3 | O=CC(OO)C(O)C(O)C(=O)(OOC1(O)C(=CC2(OOC1C2ON(=O)=O)N(=O)=O)N(=O)=O)  |
| C5e07_DNP   | 11 | 12 | 16 | 2 | O=CC(OO)C(O)C(O)C(=O)(OOC1(O)C(=CC2(OOC1C2O)N(=O)=O)N(=O)=O)         |
| C5e07_C2c   | 7  | 10 | 10 | 0 | O=CC(OO)C(O)C(O)C(=O)(OOC(C=O)CO)                                    |
| C5e07_C5a   | 11 | 12 | 12 | 0 | O=CC(OO)C(O)C(O)C(=O)(OOC(C=O)C=CC(=O)C(C=O)O))                      |
| C5e07_C4a   | 10 | 10 | 11 | 0 | O=CC(OO)C(O)C(O)C(=O)(OOC(=O)C=CC(=O)C=O)                            |
| C508_C5O8   | 10 | 14 | 16 | 0 | O=C(OOC(C(C(O)C(O)C(O)C(=O)OO)=O))C(O)C(O)C(O)C(=O)OO                |
| C508_C5eO9  | 10 | 14 | 17 | 0 | O=C(OOC(C(OOC)C(O)C(O)C(OO)=O))C(O)C(O)C(O)C(=O)OO                   |
| C508_BZBI   | 11 | 14 | 12 | 0 | O=C(OOC1C=CC2OOC1C2O)C(O)C(O)C(O)C(=O)OO                             |
| C508_BZMUa  | 11 | 12 | 12 | 0 | O=C(OOC(=O)C1OC1C=CC=O)C(O)C(O)C(O)C(=O)OO                           |
| C508_BZMUb  | 11 | 14 | 13 | 0 | O=C(OOC(C(C1OC1C=O)C(O)C=O))C(O)C(O)C(O)C(=O)OO                      |
| C508_C5DI   | 10 | 12 | 11 | 0 | O=C(OOC(C(C=O)C=CC=O))C(O)C(O)C(O)C(=O)OO                            |
| C508_NPHa   | 11 | 13 | 15 | 1 | O=C(OOC1(O)C=CC2OOC1C2ON(=O)=O)C(O)C(O)C(O)C(=O)OO                   |
| C508_PHEN   | 11 | 14 | 13 | 0 | O=C(OOC1(O)C=CC2OOC1C2O)C(O)C(O)C(O)C(=O)OO                          |
| C508_MALa   | 9  | 10 | 11 | 0 | O=C(OOC(=O)C=CC=O)C(O)C(O)C(O)C(=O)OO                                |
| C508_EPX    | 9  | 10 | 12 | 0 | O=C(OOC(=O)C1OC1C=O)C(O)C(O)C(O)C(=O)OO                              |
| C508_C3DI   | 8  | 10 | 11 | 0 | O=C(OOC(C=O)C=O)C(O)C(O)C(O)C(=O)OO                                  |
| C508_MALb   | 9  | 12 | 12 | 0 | O=C(OOC(C=O)C(O)C=O)C(O)C(O)C(O)C(=O)OO                              |
| C508_C6a    | 11 | 12 | 9  | 0 | O=C(OOC1cccc1)C(O)C(O)C(O)C(=O)OO                                    |
| C508_NBZa   | 9  | 11 | 14 | 1 | O=C(OOC1C(=O)OCC1ON(=O)=O)C(O)C(O)C(O)C(=O)OO                        |
| C508_BZFU   | 9  | 12 | 12 | 0 | O=C(OOC1C(O)COC1=O)C(O)C(O)C(O)C(=O)OO                               |
| C508_C3a    | 8  | 10 | 12 | 0 | O=C(OOC(C(=O)C(C=O)O))C(O)C(O)C(O)C(=O)OO                            |
| C508_CATE   | 11 | 12 | 10 | 0 | O=C(OOC1cccc1O)C(O)C(O)C(O)C(=O)OO                                   |
| C508_C2a    | 7  | 8  | 11 | 0 | O=C(OOC(=O)C=O)C(O)C(O)C(O)C(=O)OO                                   |
| C508_C2b    | 7  | 10 | 10 | 0 | O=C(OOCC=O)C(O)C(O)C(O)C(=O)OO                                       |
| C508_NPHb   | 11 | 11 | 11 | 1 | O=C(OOC1cccc1N(=O)=O)C(O)C(O)C(O)C(=O)OO                             |
| C508_NNC    | 11 | 12 | 18 | 2 | O=C(OOC1(O)C(=CC2(OOC1C2ON(=O)=O)N(=O)=O)O)C(O)C(O)C(O)C(=O)OO       |
| C508_NCAT   | 11 | 13 | 16 | 1 | O=C(OOC1(O)C(=CC2(OOC1C2O)N(=O)=O)O)C(O)C(O)C(O)C(=O)OO              |
| C508_NBZb   | 11 | 11 | 14 | 1 | O=C(OOC1C(=O)C=CC(=O)C1ON(=O)=O)C(O)C(O)C(O)C(=O)OO                  |
| C508_PBZ    | 11 | 12 | 12 | 0 | O=C(OOC1C(=O)C=CC(=O)C1O)C(O)C(O)C(O)C(=O)OO                         |
| C508_MALc   | 9  | 10 | 13 | 0 | O=C(OOC1C(=O)OC(=O)C1O)C(O)C(O)C(O)C(=O)OO                           |
| C508_NDN    | 11 | 11 | 19 | 3 | O=C(OOC1(O)C(=CC2(OOC1C2ON(=O)=O)N(=O)=O)N(=O)=O)C(O)C(O)C(O)C(=O)OO |
| C508_DNP    | 11 | 12 | 17 | 2 | O=C(OOC1(O)C(=CC2(OOC1C2O)N(=O)=O)N(=O)=O)C(O)C(O)C(O)C(=O)OO        |
| C508_C2c    | 7  | 10 | 11 | 0 | O=C(OOC(C(=O)CO))C(O)C(O)C(O)C(=O)OO                                 |
| C508_C5a    | 11 | 12 | 13 | 0 | O=C(OOC(C(=O)C=CC(=O)C(C=O)O))C(O)C(O)C(O)C(=O)OO                    |
| C508_C4a    | 10 | 10 | 12 | 0 | O=C(OOC(=O)C=CC(=O)C=O)C(O)C(O)C(O)C(=O)OO                           |
| C5e09_C5eO9 | 10 | 14 | 18 | 0 | O=C(OOC(C(C(OOC)C(O)C(O)C(OO)=O))C(OO)C(O)C(O)C(OO)=O                |
| C5e09_BZBI  | 11 | 14 | 13 | 0 | O=C(OOC1C=CC2OOC1C2O)C(OO)C(O)C(O)C(OO)=O                            |
| C5e09_BZMUa | 11 | 12 | 13 | 0 | O=C(OOC(=O)C1OC1C=CC=O)C(OO)C(O)C(O)C(OO)=O                          |
| C5e09_BZMUb | 11 | 14 | 14 | 0 | O=C(OOC(C(C1OC1C=O)C(O)C=O))C(OO)C(O)C(O)C(OO)=O                     |
| C5e09_C5DI  | 10 | 12 | 12 | 0 | O=C(OOC(C(C=O)C=CC=O))C(OO)C(O)C(O)C(OO)=O                           |
| C5e09_NPHa  | 11 | 13 | 16 | 1 | O=C(OOC1(O)C=CC2OOC1C2ON(=O)=O)C(OO)C(O)C(O)C(OO)=O                  |
| C5e09_PHEN  | 11 | 14 | 14 | 0 | O=C(OOC1(O)C=CC2OOC1C2O)C(OO)C(O)C(O)C(OO)=O                         |
| C5e09_MALa  | 9  | 10 | 12 | 0 | O=C(OOC(=O)C=CC=O)C(OO)C(O)C(O)C(OO)=O                               |
| C5e09_EPX   | 9  | 10 | 13 | 0 | O=C(OOC(=O)C1OC1C=O)C(OO)C(O)C(O)C(OO)=O                             |
| C5e09_C3DI  | 8  | 10 | 12 | 0 | O=C(OOC(C=O)C=O)C(OO)C(O)C(O)C(OO)=O                                 |
| C5e09_MALb  | 9  | 12 | 13 | 0 | O=C(OOC(C=O)C(O)C=O)C(OO)C(O)C(O)C(OO)=O                             |
| C5e09_C6a   | 11 | 12 | 10 | 0 | O=C(OOC1cccc1)C(OO)C(O)C(O)C(OO)=O                                   |
| C5e09_NBZa  | 9  | 11 | 15 | 1 | O=C(OOC1C(=O)OCC1ON(=O)=O)C(OO)C(O)C(O)C(OO)=O                       |
| C5e09_BZFU  | 9  | 12 | 13 | 0 | O=C(OOC1C(O)COC1=O)C(OO)C(O)C(O)C(OO)=O                              |
| C5e09_C3a   | 8  | 10 | 13 | 0 | O=C(OOC(C(=O)C(C=O)O))C(OO)C(O)C(O)C(OO)=O                           |
| C5e09_CATE  | 11 | 12 | 11 | 0 | O=C(OOC1cccc1O)C(OO)C(O)C(O)C(OO)=O                                  |
| C5e09_C2a   | 7  | 8  | 12 | 0 | O=C(OOC(=O)C=O)C(OO)C(O)C(O)C(OO)=O                                  |
| C5e09_C2b   | 7  | 10 | 11 | 0 | O=C(OOCC=O)C(OO)C(O)C(O)C(OO)=O                                      |
| C5e09_NPHb  | 11 | 11 | 12 | 1 | O=C(OOC1cccc1N(=O)=O)C(OO)C(O)C(O)C(OO)=O                            |

|             |    |    |    |   |                                                                       |
|-------------|----|----|----|---|-----------------------------------------------------------------------|
| C5e09_NNC   | 11 | 12 | 19 | 2 | O=C(OOC1(O)C(=CC2(OOC1C2ON(=O)=O)N(=O)=O)O)C(OO)C(O)C(O)C(OO)=O       |
| C5e09_NCAT  | 11 | 13 | 17 | 1 | O=C(OOC1(O)C(=CC2(OOC1C2O)N(=O)=O)O)C(OO)C(O)C(O)C(OO)=O              |
| C5e09_NBZb  | 11 | 11 | 15 | 1 | O=C(OOC1C(=O)C=CC(=O)C1ON(=O)=O)C(OO)C(O)C(O)C(OO)=O                  |
| C5e09_PBZ   | 11 | 12 | 13 | 0 | O=C(OOC1C(=O)C=CC(=O)C1O)C(OO)C(O)C(O)C(OO)=O                         |
| C5e09_MALc  | 9  | 10 | 14 | 0 | O=C(OOC1C(=O)OC(=O)C1O)C(OO)C(O)C(O)C(OO)=O                           |
| C5e09_NDN   | 11 | 11 | 20 | 3 | O=C(OOC1(O)C(=CC2(OOC1C2ON(=O)=O)N(=O)=O)N(=O)=O)C(OO)C(O)C(O)C(OO)=O |
| C5e09_DNP   | 11 | 12 | 18 | 2 | O=C(OOC1(O)C(=CC2(OOC1C2O)N(=O)=O)N(=O)=O)C(OO)C(O)C(O)C(OO)=O        |
| C5e09_C2c   | 7  | 10 | 12 | 0 | O=C(OO(C(=O)CO)C(OO)C(O)C(O)C(OO)=O                                   |
| C5e09_C5a   | 11 | 12 | 14 | 0 | O=C(OO(C(=O)C=CC(=O)C(C=O)O))C(OO)C(O)C(O)C(OO)=O                     |
| C5e09_C4a   | 10 | 10 | 13 | 0 | O=C(OOC(=O)C=CC(=O)C=O)C(OO)C(O)C(O)C(OO)=O                           |
| BZBI_BZBI   | 12 | 14 | 8  | 0 | O(C1C=CC2OOC1C2O)OC1C=CC2OOC1C2O                                      |
| BZBI_BZMUa  | 12 | 12 | 8  | 0 | O(C1C=CC2OOC1C2O)OC(=O)C1OC1C=CC=O                                    |
| BZBI_BZMUb  | 12 | 14 | 9  | 0 | O=CC(O)C(OOC1C=CC2OOC1C2O)C1OC1C=O                                    |
| BZBI_C5DI   | 11 | 12 | 7  | 0 | O=CC=CC(OOC1C=CC2OOC1C2O)C=O                                          |
| BZBI_NPHa   | 12 | 13 | 11 | 1 | O(C1C=CC2OOC1C2O)OC1(O)C=CC2OOC1C2ON(=O)=O                            |
| BZBI_PHEN   | 12 | 14 | 9  | 0 | O(C1C=CC2OOC1C2O)OC1(O)C=CC2OOC1C2O                                   |
| BZBI_MALa   | 10 | 10 | 7  | 0 | O(C1C=CC2OOC1C2O)OC(=O)C=CC=O                                         |
| BZBI_EPX    | 10 | 10 | 8  | 0 | O(C1C=CC2OOC1C2O)OC(=O)C1OC1C=O                                       |
| BZBI_C3DI   | 9  | 10 | 7  | 0 | O(C1C=CC2OOC1C2O)OC(C=O)C=O                                           |
| BZBI_MALb   | 10 | 12 | 8  | 0 | O(C1C=CC2OOC1C2O)OC(C=O)C(O)C=O                                       |
| BZBI_C6a    | 12 | 12 | 5  | 0 | O(C1C=CC2OOC1C2O)Oc1cccc1                                             |
| BZBI_NBZa   | 10 | 11 | 10 | 1 | O(C1C=CC2OOC1C2O)OC1C(=O)OCC1ON(=O)=O                                 |
| BZBI_BZFU   | 10 | 12 | 8  | 0 | O(C1C=CC2OOC1C2O)OC1C(O)COC1=O                                        |
| BZBI_C3a    | 9  | 10 | 8  | 0 | OC(C=O)C(=O)(OOC1C=CC2OOC1C2O)                                        |
| BZBI_CATE   | 12 | 12 | 6  | 0 | O(C1C=CC2OOC1C2O)Oc1cccc1O                                            |
| BZBI_C2a    | 8  | 8  | 7  | 0 | O(C1C=CC2OOC1C2O)OC(=O)C=O                                            |
| BZBI_C2b    | 8  | 10 | 6  | 0 | O(C1C=CC2OOC1C2O)OCC=O                                                |
| BZBI_NPHb   | 12 | 11 | 7  | 1 | O(C1C=CC2OOC1C2O)Oc1cccc1N(=O)=O                                      |
| BZBI_NNC    | 12 | 12 | 14 | 2 | O(C1C=CC2OOC1C2O)OC1(O)C(=CC2(OOC1C2ON(=O)=O)N(=O)=O)O                |
| BZBI_NCAT   | 12 | 13 | 12 | 1 | O(C1C=CC2OOC1C2O)OC1(O)C(=CC2(OOC1C2O)N(=O)=O)O                       |
| BZBI_NBZb   | 12 | 11 | 10 | 1 | O(C1C=CC2OOC1C2O)OC1C(=O)C=CC(=O)C1ON(=O)=O                           |
| BZBI_PBZ    | 12 | 12 | 8  | 0 | O(C1C=CC2OOC1C2O)OC1C(=O)C=CC(=O)C1O                                  |
| BZBI_MALc   | 10 | 10 | 9  | 0 | O(C1C=CC2OOC1C2O)OC1C(=O)OC(=O)C1O                                    |
| BZBI_NDN    | 12 | 11 | 15 | 3 | O(C1C=CC2OOC1C2O)OC1(O)C(=CC2(OOC1C2ON(=O)=O)N(=O)=O)N(=O)=O          |
| BZBI_DNP    | 12 | 12 | 13 | 2 | O(C1C=CC2OOC1C2O)OC1(O)C(=CC2(OOC1C2O)N(=O)=O)N(=O)=O                 |
| BZBI_C2c    | 8  | 10 | 7  | 0 | OCC(=O)(OOC1C=CC2OOC1C2O)                                             |
| BZBI_C5a    | 12 | 12 | 9  | 0 | OC(C=O)C(=O)C=CC(=O)(OOC1C=CC2OOC1C2O)                                |
| BZBI_C4a    | 11 | 10 | 8  | 0 | O(C1C=CC2OOC1C2O)OC(=O)C=CC(=O)C=O                                    |
| BZMUa_BZMUa | 12 | 10 | 8  | 0 | O(C(=O)C1OC1C=CC=O)OC(=O)C1OC1C=CC=O                                  |
| BZMUa_BZMUb | 12 | 12 | 9  | 0 | O=CC(O)C(OOC(=O)C1OC1C=CC=O)C1OC1C=O                                  |
| BZMUa_C5DI  | 11 | 10 | 7  | 0 | O=CC=CC(OOC(=O)C1OC1C=CC=O)C=O                                        |
| BZMUa_NPHa  | 12 | 11 | 11 | 1 | O(C(=O)C1OC1C=CC=O)OC1(O)C=CC2OOC1C2ON(=O)=O                          |
| BZMUa_PHEN  | 12 | 12 | 9  | 0 | O(C(=O)C1OC1C=CC=O)OC1(O)C=CC2OOC1C2O                                 |
| BZMUa_MALa  | 10 | 8  | 7  | 0 | O(C(=O)C1OC1C=CC=O)OC(=O)C=CC=O                                       |
| BZMUa_EPX   | 10 | 8  | 8  | 0 | O(C(=O)C1OC1C=CC=O)OC(=O)C1OC1C=O                                     |
| BZMUa_C3DI  | 9  | 8  | 7  | 0 | O(C(=O)C1OC1C=CC=O)OC(C=O)C=O                                         |
| BZMUa_MALb  | 10 | 10 | 8  | 0 | O(C(=O)C1OC1C=CC=O)OC(C=O)C(O)C=O                                     |
| BZMUa_C6a   | 12 | 10 | 5  | 0 | O(C(=O)C1OC1C=CC=O)Oc1cccc1                                           |
| BZMUa_NBZa  | 10 | 9  | 10 | 1 | O(C(=O)C1OC1C=CC=O)OC1C(=O)OCC1ON(=O)=O                               |
| BZMUa_BZFU  | 10 | 10 | 8  | 0 | O(C(=O)C1OC1C=CC=O)OC1C(O)COC1=O                                      |
| BZMUa_C3a   | 9  | 8  | 8  | 0 | OC(C=O)C(=O)(OOC(=O)C1OC1C=CC=O)                                      |
| BZMUa_CATE  | 12 | 10 | 6  | 0 | O(C(=O)C1OC1C=CC=O)Oc1cccc1O                                          |
| BZMUa_C2a   | 8  | 6  | 7  | 0 | O(C(=O)C1OC1C=CC=O)OC(=O)C=O                                          |
| BZMUa_C2b   | 8  | 8  | 6  | 0 | O(C(=O)C1OC1C=CC=O)OCC=O                                              |
| BZMUa_NPHb  | 12 | 9  | 7  | 1 | O(C(=O)C1OC1C=CC=O)Oc1cccc1N(=O)=O                                    |
| BZMUa_NNC   | 12 | 10 | 14 | 2 | O(C(=O)C1OC1C=CC=O)OC1(O)C(=CC2(OOC1C2ON(=O)=O)N(=O)=O)O              |
| BZMUa_NCAT  | 12 | 11 | 12 | 1 | O(C(=O)C1OC1C=CC=O)OC1(O)C(=CC2(OOC1C2O)N(=O)=O)O                     |
| BZMUa_NBZb  | 12 | 9  | 10 | 1 | O(C(=O)C1OC1C=CC=O)OC1C(=O)C=CC(=O)C1ON(=O)=O                         |
| BZMUa_PBZ   | 12 | 10 | 8  | 0 | O(C(=O)C1OC1C=CC=O)OC1C(=O)C=CC(=O)C1O                                |
| BZMUa_MALc  | 10 | 8  | 9  | 0 | O(C(=O)C1OC1C=CC=O)OC1C(=O)OC(=O)C1O                                  |
| BZMUa_NDN   | 12 | 9  | 15 | 3 | O(C(=O)C1OC1C=CC=O)OC1(O)C(=CC2(OOC1C2ON(=O)=O)N(=O)=O)N(=O)=O        |
| BZMUa_DNP   | 12 | 10 | 13 | 2 | O(C(=O)C1OC1C=CC=O)OC1(O)C(=CC2(OOC1C2O)N(=O)=O)N(=O)=O               |
| BZMUa_C2c   | 8  | 8  | 7  | 0 | OCC(=O)(OOC(=O)C1OC1C=CC=O)                                           |
| BZMUa_C5a   | 12 | 10 | 9  | 0 | OC(C=O)C(=O)C=CC(=O)(OOC(=O)C1OC1C=CC=O)                              |
| BZMUa_C4a   | 11 | 8  | 8  | 0 | O(C(=O)C1OC1C=CC=O)OC(=O)C=CC(=O)C=O                                  |
| BZMUb_BZMUb | 12 | 14 | 10 | 0 | O=CC(O)C(OO(C1OC1C=O)C(O)C(O))C1OC1C=O                                |
| BZMUb_C5DI  | 11 | 12 | 8  | 0 | O=CC(O)C(OO(C(C=O)C=CC(O))C1OC1C=O                                    |
| BZMUb_NPHa  | 12 | 13 | 12 | 1 | O=CC(O)C(OOC1(O)C=CC2OOC1C2ON(=O)=O)C1OC1C=O                          |
| BZMUb_PHEN  | 12 | 14 | 10 | 0 | O=CC(O)C(OOC1(O)C=CC2OOC1C2O)C1OC1C=O                                 |
| BZMUb_MALa  | 10 | 10 | 8  | 0 | O=CC(O)C(OOC(=O)C=CC=O)C1OC1C=O                                       |
| BZMUb_EPX   | 10 | 10 | 9  | 0 | O=CC(O)C(OOC(=O)C1OC1C=O)C1OC1C=O                                     |
| BZMUb_C3DI  | 9  | 10 | 8  | 0 | O=CC(O)C(OOC(C=O)C=O)C1OC1C=O                                         |
| BZMUb_MALb  | 10 | 12 | 9  | 0 | O=CC(O)C(OOC(C=O)C(O)C=O)C1OC1C=O                                     |
| BZMUb_C6a   | 12 | 12 | 6  | 0 | O=CC(O)C(OOc1cccc1)C1OC1C=O                                           |
| BZMUb_NBZa  | 10 | 11 | 11 | 1 | O=CC(O)C(OOC1C(=O)OCC1ON(=O)=O)C1OC1C=O                               |

|            |    |    |    |   |                                                                        |
|------------|----|----|----|---|------------------------------------------------------------------------|
| BZMUb_BZFU | 10 | 12 | 9  | 0 | O=CC(O)C(OOC1C(O)COC1=O)C1OC1C=O                                       |
| BZMUb_C3a  | 9  | 10 | 9  | 0 | O=CC(O)C(OO(C(=O)C(C=O)O))C1OC1C=O                                     |
| BZMUb_CATE | 12 | 12 | 7  | 0 | O=CC(O)C(OOc1cccc1O)C1OC1C=O                                           |
| BZMUb_C2a  | 8  | 8  | 8  | 0 | O=CC(O)C(OOC(=O)C=O)C1OC1C=O                                           |
| BZMUb_C2b  | 8  | 10 | 7  | 0 | O=CC(O)C(OOCC=O)C1OC1C=O                                               |
| BZMUb_NPHb | 12 | 11 | 8  | 1 | O=CC(O)C(OOc1cccc1N(=O)=O)C1OC1C=O                                     |
| BZMUb_NNC  | 12 | 12 | 15 | 2 | O=CC(O)C(OOC1(O)C(=CC2(OOC1C2ON(=O)=O)N(=O)=O)O)C1OC1C=O               |
| BZMUb_NCAT | 12 | 13 | 13 | 1 | O=CC(O)C(OOC1(O)C(=CC2(OOC1C2O)N(=O)=O)O)C1OC1C=O                      |
| BZMUb_NBZb | 12 | 11 | 11 | 1 | O=CC(O)C(OOC1C(=O)C=CC(=O)C1ON(=O)=O)C1OC1C=O                          |
| BZMUb_PBZ  | 12 | 12 | 9  | 0 | O=CC(O)C(OOC1C(=O)C=CC(=O)C1O)C1OC1C=O                                 |
| BZMUb_MALc | 10 | 10 | 10 | 0 | O=CC(O)C(OOC1C(=O)OC(=O)C1O)C1OC1C=O                                   |
| BZMUb_NDN  | 12 | 11 | 16 | 3 | O=CC(O)C(OOC1(O)C(=CC2(OOC1C2ON(=O)=O)N(=O)=O)N(=O)=O)C1OC1C=O         |
| BZMUb_DNP  | 12 | 12 | 14 | 2 | O=CC(O)C(OOC1(O)C(=CC2(OOC1C2O)N(=O)=O)N(=O)=O)C1OC1C=O                |
| BZMUb_C2c  | 8  | 10 | 8  | 0 | O=CC(O)C(OO(C(=O)CO))C1OC1C=O                                          |
| BZMUb_C5a  | 12 | 12 | 10 | 0 | O=CC(O)C(OO(C(=O)C=CC(=O)C(C=O)O))C1OC1C=O                             |
| BZMUb_C4a  | 11 | 10 | 9  | 0 | O=CC(O)C(OOC(=O)C=CC(=O)C=O)C1OC1C=O                                   |
| C5DI_C5DI  | 10 | 10 | 6  | 0 | O=CC=CC(OO(C(C=O)C=CC=O))C=O                                           |
| C5DI_NPHa  | 11 | 11 | 10 | 1 | O=CC=CC(OOC1(O)C=CC2OOC1C2ON(=O)=O)C=O                                 |
| C5DI_PHEN  | 11 | 12 | 8  | 0 | O=CC=CC(OOC1(O)C=CC2OOC1C2O)C=O                                        |
| C5DI_MALa  | 9  | 8  | 6  | 0 | O=CC=CC(OOC(=O)C=CC=O)C=O                                              |
| C5DI_EPX   | 9  | 8  | 7  | 0 | O=CC=CC(OOC(=O)C1OC1C=O)C=O                                            |
| C5DI_C3DI  | 8  | 8  | 6  | 0 | O=CC=CC(OOC(C=O)C=O)C=O                                                |
| C5DI_MALb  | 9  | 10 | 7  | 0 | O=CC=CC(OOC(C=O)C(O)C=O)C=O                                            |
| C5DI_C6a   | 11 | 10 | 4  | 0 | O=CC=CC(OOc1cccc1)C=O                                                  |
| C5DI_NBZa  | 9  | 9  | 9  | 1 | O=CC=CC(OOC1C(=O)OCC1ON(=O)=O)C=O                                      |
| C5DI_BZFU  | 9  | 10 | 7  | 0 | O=CC=CC(OOC1C(O)COC1=O)C=O                                             |
| C5DI_C3a   | 8  | 8  | 7  | 0 | O=CC=CC(OO(C(=O)C(C=O)O))C=O                                           |
| C5DI_CATE  | 11 | 10 | 5  | 0 | O=CC=CC(OOc1cccc1O)C=O                                                 |
| C5DI_C2a   | 7  | 6  | 6  | 0 | O=CC=CC(OOC(=O)C=O)C=O                                                 |
| C5DI_C2b   | 7  | 8  | 5  | 0 | O=CC=CC(OOCC=O)C=O                                                     |
| C5DI_NPHb  | 11 | 9  | 6  | 1 | O=CC=CC(OOc1cccc1N(=O)=O)C=O                                           |
| C5DI_NNC   | 11 | 10 | 13 | 2 | O=CC=CC(OOC1(O)C(=CC2(OOC1C2ON(=O)=O)N(=O)=O)O)C=O                     |
| C5DI_NCAT  | 11 | 11 | 11 | 1 | O=CC=CC(OOC1(O)C(=CC2(OOC1C2O)N(=O)=O)O)C=O                            |
| C5DI_NBZb  | 11 | 9  | 9  | 1 | O=CC=CC(OOC1C(=O)C=CC(=O)C1ON(=O)=O)C=O                                |
| C5DI_PBZ   | 11 | 10 | 7  | 0 | O=CC=CC(OOC1C(=O)C=CC(=O)C1O)C=O                                       |
| C5DI_MALc  | 9  | 8  | 8  | 0 | O=CC=CC(OOC1C(=O)OC(=O)C1O)C=O                                         |
| C5DI_NDN   | 11 | 9  | 14 | 3 | O=CC=CC(OOC1(O)C(=CC2(OOC1C2ON(=O)=O)N(=O)=O)N(=O)=O)C=O               |
| C5DI_DNP   | 11 | 10 | 12 | 2 | O=CC=CC(OOC1(O)C(=CC2(OOC1C2O)N(=O)=O)N(=O)=O)C=O                      |
| C5DI_C2c   | 7  | 8  | 6  | 0 | O=CC=CC(OO(C(=O)CO))C=O                                                |
| C5DI_C5a   | 11 | 10 | 8  | 0 | O=CC=CC(OO(C(=O)C=CC(=O)C(C=O)O))C=O                                   |
| C5DI_C4a   | 10 | 8  | 7  | 0 | O=CC=CC(OOC(=O)C=CC(=O)C=O)C=O                                         |
| NPHa_NPHa  | 12 | 12 | 14 | 2 | O(C1(O)C=CC2OOC1C2ON(=O)=O)OC1(O)C=CC2OOC1C2ON(=O)=O                   |
| NPHa_PHEN  | 12 | 13 | 12 | 1 | O(C1(O)C=CC2OOC1C2ON(=O)=O)OC1(O)C=CC2OOC1C2O                          |
| NPHa_MALa  | 10 | 9  | 10 | 1 | O(C1(O)C=CC2OOC1C2ON(=O)=O)OC(=O)C=CC=O                                |
| NPHa_EPX   | 10 | 9  | 11 | 1 | O(C1(O)C=CC2OOC1C2ON(=O)=O)OC(=O)C1OC1C=O                              |
| NPHa_C3DI  | 9  | 9  | 10 | 1 | O(C1(O)C=CC2OOC1C2ON(=O)=O)OC(C=O)C=O                                  |
| NPHa_MALb  | 10 | 11 | 11 | 1 | O(C1(O)C=CC2OOC1C2ON(=O)=O)OC(C=O)C(O)C=O                              |
| NPHa_C6a   | 12 | 11 | 8  | 1 | O(C1(O)C=CC2OOC1C2ON(=O)=O)Oc1cccc1                                    |
| NPHa_NBZa  | 10 | 10 | 13 | 2 | O(C1(O)C=CC2OOC1C2ON(=O)=O)OC1C(=O)OCC1ON(=O)=O                        |
| NPHa_BZFU  | 10 | 11 | 11 | 1 | O(C1(O)C=CC2OOC1C2ON(=O)=O)OC1C(O)COC1=O                               |
| NPHa_C3a   | 9  | 9  | 11 | 1 | OC(C=O)C(=O)(OOC1(O)C=CC2OOC1C2ON(=O)=O)                               |
| NPHa_CATE  | 12 | 11 | 9  | 1 | O(C1(O)C=CC2OOC1C2ON(=O)=O)Oc1cccc1O                                   |
| NPHa_C2a   | 8  | 7  | 10 | 1 | O(C1(O)C=CC2OOC1C2ON(=O)=O)OC(=O)C=O                                   |
| NPHa_C2b   | 8  | 9  | 9  | 1 | O(C1(O)C=CC2OOC1C2ON(=O)=O)OCC=O                                       |
| NPHa_NPHb  | 12 | 10 | 10 | 2 | O(C1(O)C=CC2OOC1C2ON(=O)=O)Oc1cccc1N(=O)=O                             |
| NPHa_NNC   | 12 | 11 | 17 | 3 | O(C1(O)C=CC2OOC1C2ON(=O)=O)OC1(O)C(=CC2(OOC1C2ON(=O)=O)N(=O)=O)O       |
| NPHa_NCAT  | 12 | 12 | 15 | 2 | O(C1(O)C=CC2OOC1C2ON(=O)=O)OC1(O)C(=CC2(OOC1C2O)N(=O)=O)O              |
| NPHa_NBZb  | 12 | 10 | 13 | 2 | O(C1(O)C=CC2OOC1C2ON(=O)=O)OC1C(=O)C=CC(=O)C1ON(=O)=O                  |
| NPHa_PBZ   | 12 | 11 | 11 | 1 | O(C1(O)C=CC2OOC1C2ON(=O)=O)OC1C(=O)C=CC(=O)C1O                         |
| NPHa_MALc  | 10 | 9  | 12 | 1 | O(C1(O)C=CC2OOC1C2ON(=O)=O)OC1C(=O)OC(=O)C1O                           |
| NPHa_NDN   | 12 | 10 | 18 | 4 | O(C1(O)C=CC2OOC1C2ON(=O)=O)OC1(O)C(=CC2(OOC1C2ON(=O)=O)N(=O)=O)N(=O)=O |
| NPHa_DNP   | 12 | 11 | 16 | 3 | O(C1(O)C=CC2OOC1C2ON(=O)=O)OC1(O)C(=CC2(OOC1C2O)N(=O)=O)N(=O)=O        |
| NPHa_C2c   | 8  | 9  | 10 | 1 | OCC(=O)(OOC1(O)C=CC2OOC1C2ON(=O)=O)                                    |
| NPHa_C5a   | 12 | 11 | 12 | 1 | OC(C=O)C(=O)C=CC(=O)(OOC1(O)C=CC2OOC1C2ON(=O)=O)                       |
| NPHa_C4a   | 11 | 9  | 11 | 1 | O(C1(O)C=CC2OOC1C2ON(=O)=O)OC(=O)C=CC(=O)C=O                           |
| PHEN_PHEN  | 12 | 14 | 10 | 0 | O(C1(O)C=CC2OOC1C2O)OC1(O)C=CC2OOC1C2O                                 |
| PHEN_MALa  | 10 | 10 | 8  | 0 | O(C1(O)C=CC2OOC1C2O)OC(=O)C=CC=O                                       |
| PHEN_EPX   | 10 | 10 | 9  | 0 | O(C1(O)C=CC2OOC1C2O)OC(=O)C1OC1C=O                                     |
| PHEN_C3DI  | 9  | 10 | 8  | 0 | O(C1(O)C=CC2OOC1C2O)OC(C=O)C=O                                         |
| PHEN_MALb  | 10 | 12 | 9  | 0 | O(C1(O)C=CC2OOC1C2O)OC(C=O)C(O)C=O                                     |
| PHEN_C6a   | 12 | 12 | 6  | 0 | O(C1(O)C=CC2OOC1C2O)Oc1cccc1                                           |
| PHEN_NBZa  | 10 | 11 | 11 | 1 | O(C1(O)C=CC2OOC1C2O)OC1C(=O)OCC1ON(=O)=O                               |
| PHEN_BZFU  | 10 | 12 | 9  | 0 | O(C1(O)C=CC2OOC1C2O)OC1C(O)COC1=O                                      |
| PHEN_C3a   | 9  | 10 | 9  | 0 | OC(C=O)C(=O)(OOC1(O)C=CC2OOC1C2O)                                      |
| PHEN_CATE  | 12 | 12 | 7  | 0 | O(C1(O)C=CC2OOC1C2O)Oc1cccc1O                                          |



|           |    |    |    |   |                                                                 |
|-----------|----|----|----|---|-----------------------------------------------------------------|
| PHEN_C2a  | 8  | 8  | 8  | 0 | O(C1(O)C=CC2OOC1C2O)OC(=O)C=O                                   |
| PHEN_C2b  | 8  | 10 | 7  | 0 | O(C1(O)C=CC2OOC1C2O)OCC=O                                       |
| PHEN_NPHb | 12 | 11 | 8  | 1 | O(C1(O)C=CC2OOC1C2O)Oc1cccc1N(=O)=O                             |
| PHEN_NNC  | 12 | 12 | 15 | 2 | O(C1(O)C=CC2OOC1C2O)OC1(O)C(=CC2(OOC1C2ON(=O)=O)N(=O)=O)O       |
| PHEN_NCAT | 12 | 13 | 13 | 1 | O(C1(O)C=CC2OOC1C2O)OC1(O)C(=CC2(OOC1C2O)N(=O)=O)O              |
| PHEN_NBZb | 12 | 11 | 11 | 1 | O(C1(O)C=CC2OOC1C2O)OC1C(=O)C=CC(=O)C1ON(=O)=O                  |
| PHEN_PBZ  | 12 | 12 | 9  | 0 | O(C1(O)C=CC2OOC1C2O)OC1C(=O)C=CC(=O)C1O                         |
| PHEN_MALc | 10 | 10 | 10 | 0 | O(C1(O)C=CC2OOC1C2O)OC1C(=O)OC(=O)C1O                           |
| PHEN_NDN  | 12 | 11 | 16 | 3 | O(C1(O)C=CC2OOC1C2O)OC1(O)C(=CC2(OOC1C2ON(=O)=O)N(=O)=O)N(=O)=O |
| PHEN_DNP  | 12 | 12 | 14 | 2 | O(C1(O)C=CC2OOC1C2O)OC1(O)C(=CC2(OOC1C2O)N(=O)=O)N(=O)=O        |
| PHEN_C2c  | 8  | 10 | 8  | 0 | OCC(=O)(OOC1(O)C=CC2OOC1C2O)                                    |
| PHEN_C5a  | 12 | 12 | 10 | 0 | OC(C=O)C(=O)C=CC(=O)(OOC1(O)C=CC2OOC1C2O)                       |
| PHEN_C4a  | 11 | 10 | 9  | 0 | O(C1(O)C=CC2OOC1C2O)OC(=O)C=CC(=O)C=O                           |
| MALa_MALa | 8  | 6  | 6  | 0 | O(C(=O)C=CC(=O)OC(=O)C=CC=O                                     |
| MALa_EPX  | 8  | 6  | 7  | 0 | O(C(=O)C=CC(=O)OC(=O)C1OC1C=O                                   |
| MALa_C3DI | 7  | 6  | 6  | 0 | O(C(=O)C=CC(=O)OC(C=O)C=O                                       |
| MALa_MALb | 8  | 8  | 7  | 0 | O(C(=O)C=CC(=O)OC(C=O)C(O)C=O                                   |
| MALa_C6a  | 10 | 8  | 4  | 0 | O(C(=O)C=CC(=O)Oc1cccc1                                         |
| MALa_NBZa | 8  | 7  | 9  | 1 | O(C(=O)C=CC(=O)OC1C(=O)OCC1ON(=O)=O                             |
| MALa_BZFU | 8  | 8  | 7  | 0 | O(C(=O)C=CC(=O)OC1C(O)COC1=O                                    |
| MALa_C3A  | 7  | 6  | 7  | 0 | OC(C=O)C(=O)(OOC(=O)C=CC=O)                                     |
| MALa_CATE | 10 | 8  | 5  | 0 | O(C(=O)C=CC(=O)Oc1cccc1O                                        |
| MALa_C2a  | 6  | 4  | 6  | 0 | O(C(=O)C=CC(=O)OC(=O)C=O                                        |
| MALa_C2b  | 6  | 6  | 5  | 0 | O(C(=O)C=CC(=O)OCC=O                                            |
| MALa_NPHb | 10 | 7  | 6  | 1 | O(C(=O)C1OC1C=O)Oc1cccc1N(=O)=O                                 |
| MALa_NNC  | 10 | 8  | 13 | 2 | O(C(=O)C=CC(=O)OC1(O)C(=CC2(OOC1C2ON(=O)=O)N(=O)=O)O            |
| MALa_NCAT | 10 | 9  | 11 | 1 | O(C(=O)C=CC(=O)OC1(O)C(=CC2(OOC1C2O)N(=O)=O)O                   |
| MALa_NBZb | 10 | 7  | 9  | 1 | O(C(=O)C=CC(=O)OC1C(=O)C=CC(=O)C1ON(=O)=O                       |
| MALa_PBZ  | 10 | 8  | 7  | 0 | O(C(=O)C=CC(=O)OC1C(=O)C=CC(=O)C1O                              |
| MALa_MALc | 8  | 6  | 8  | 0 | O(C(=O)C=CC(=O)OC1C(=O)OC(=O)C1O                                |
| MALa_NDN  | 10 | 7  | 14 | 3 | O(C(=O)C=CC(=O)OC1(O)C(=CC2(OOC1C2ON(=O)=O)N(=O)=O)N(=O)=O      |
| MALa_DNP  | 10 | 8  | 12 | 2 | O(C(=O)C=CC(=O)OC1(O)C(=CC2(OOC1C2O)N(=O)=O)N(=O)=O             |
| MALa_C2c  | 6  | 6  | 6  | 0 | OCC(=O)(OOC(=O)C=CC=O)                                          |
| MALa_C5a  | 10 | 8  | 8  | 0 | OC(C=O)C(=O)C=CC(=O)(OOC(=O)C=CC=O)                             |
| MALa_C4a  | 9  | 6  | 7  | 0 | O(C(=O)C=CC(=O)OC(=O)C=CC(=O)C=O                                |
| EPX_EPX   | 8  | 6  | 8  | 0 | O(C(=O)C1OC1C=O)OC(=O)C1OC1C=O                                  |
| EPX_C3DI  | 7  | 6  | 7  | 0 | O(C(=O)C1OC1C=O)OC(C=O)C=O                                      |
| EPX_MALb  | 8  | 8  | 8  | 0 | O(C(=O)C1OC1C=O)OC(C=O)C(O)C=O                                  |
| EPX_C6a   | 10 | 8  | 5  | 0 | O(C(=O)C1OC1C=O)Oc1cccc1                                        |
| EPX_NBZa  | 8  | 7  | 10 | 1 | O(C(=O)C1OC1C=O)OC1C(=O)OCC1ON(=O)=O                            |
| EPX_BZFU  | 8  | 8  | 8  | 0 | O(C(=O)C1OC1C=O)OC1C(O)COC1=O                                   |
| EPX_C3a   | 7  | 6  | 8  | 0 | OC(C=O)C(=O)(OOC(=O)C1OC1C=O)                                   |
| EPX_CATE  | 10 | 8  | 6  | 0 | O(C(=O)C1OC1C=O)Oc1cccc1O                                       |
| EPX_C2a   | 6  | 4  | 7  | 0 | O(C(=O)C1OC1C=O)OC(=O)C=O                                       |
| EPX_C2b   | 6  | 6  | 6  | 0 | O(C(=O)C1OC1C=O)OCC=O                                           |
| EPX_NPHb  | 10 | 7  | 7  | 1 | O(C(=O)C1OC1C=O)Oc1cccc1N(=O)=O                                 |
| EPX_NNC   | 10 | 8  | 14 | 2 | O(C(=O)C1OC1C=O)OC1(O)C(=CC2(OOC1C2ON(=O)=O)N(=O)=O)O           |
| EPX_NCAT  | 10 | 9  | 12 | 1 | O(C(=O)C1OC1C=O)OC1(O)C(=CC2(OOC1C2O)N(=O)=O)O                  |
| EPX_NBZb  | 10 | 7  | 10 | 1 | O(C(=O)C1OC1C=O)OC1C(=O)C=CC(=O)C1ON(=O)=O                      |
| EPX_PBZ   | 10 | 8  | 8  | 0 | O(C(=O)C1OC1C=O)OC1C(=O)C=CC(=O)C1O                             |
| EPX_MALc  | 8  | 6  | 9  | 0 | O(C(=O)C1OC1C=O)OC1C(=O)OC(=O)C1O                               |
| EPX_NDN   | 10 | 7  | 15 | 3 | O(C(=O)C1OC1C=O)OC1(O)C(=CC2(OOC1C2ON(=O)=O)N(=O)=O)N(=O)=O     |
| EPX_DNP   | 10 | 8  | 13 | 2 | O(C(=O)C1OC1C=O)OC1(O)C(=CC2(OOC1C2O)N(=O)=O)N(=O)=O            |
| EPX_C2c   | 6  | 6  | 7  | 0 | OCC(=O)(OOC(=O)C1OC1C=O)                                        |
| EPX_C5a   | 10 | 8  | 9  | 0 | OC(C=O)C(=O)C=CC(=O)(OOC(=O)C1OC1C=O)                           |
| EPX_C4a   | 9  | 6  | 8  | 0 | O(C(=O)C1OC1C=O)OC(=O)C=CC(=O)C=O                               |
| C3DI_C3DI | 6  | 6  | 6  | 0 | O(C(C=O)C=O)OC(C=O)C=O                                          |
| C3DI_MALb | 7  | 8  | 7  | 0 | O(C(C=O)C=O)OC(C=O)C(O)C=O                                      |
| C3DI_C6a  | 9  | 8  | 4  | 0 | O(C(C=O)C=O)Oc1cccc1                                            |
| C3DI_NBZa | 7  | 7  | 9  | 1 | O(C(C=O)C=O)OC1C(=O)OCC1ON(=O)=O                                |
| C3DI_BZFU | 7  | 8  | 7  | 0 | O(C(C=O)C=O)OC1C(O)COC1=O                                       |
| C3DI_C3a  | 6  | 6  | 7  | 0 | OC(C=O)C(=O)(OOC(C=O)C=O)                                       |
| C3DI_CATE | 9  | 8  | 5  | 0 | O(C(C=O)C=O)Oc1cccc1O                                           |
| C3DI_C2a  | 5  | 4  | 6  | 0 | O(C(C=O)C=O)OC(=O)C=O                                           |
| C3DI_C2b  | 5  | 6  | 5  | 0 | O(C(C=O)C=O)OCC=O                                               |
| C3DI_NPHb | 9  | 7  | 6  | 1 | O(C(C=O)C=O)Oc1cccc1N(=O)=O                                     |
| C3DI_NNC  | 9  | 8  | 13 | 2 | O(C(C=O)C=O)OC1(O)C(=CC2(OOC1C2ON(=O)=O)N(=O)=O)O               |
| C3DI_NCAT | 9  | 9  | 11 | 1 | O(C(C=O)C=O)OC1(O)C(=CC2(OOC1C2O)N(=O)=O)O                      |
| C3DI_NBZb | 9  | 7  | 9  | 1 | O(C(C=O)C=O)OC1C(=O)C=CC(=O)C1ON(=O)=O                          |
| C3DI_PBZ  | 9  | 8  | 7  | 0 | O(C(C=O)C=O)OC1C(=O)C=CC(=O)C1O                                 |
| C3DI_MALc | 7  | 6  | 8  | 0 | O(C(C=O)C=O)OC1C(=O)OC(=O)C1O                                   |
| C3DI_NDN  | 9  | 7  | 14 | 3 | O(C(C=O)C=O)OC1(O)C(=CC2(OOC1C2ON(=O)=O)N(=O)=O)N(=O)=O         |
| C3DI_DNP  | 9  | 8  | 12 | 2 | O(C(C=O)C=O)OC1(O)C(=CC2(OOC1C2O)N(=O)=O)N(=O)=O                |
| C3DI_C2c  | 5  | 6  | 6  | 0 | OCC(=O)(OOC(C=O)C=O)                                            |
| C3DI_C5a  | 9  | 8  | 8  | 0 | OC(C=O)C(=O)C=CC(=O)(OOC(C=O)C=O)                               |

|           |    |    |    |   |                                                                   |
|-----------|----|----|----|---|-------------------------------------------------------------------|
| C3DI_C4a  | 8  | 6  | 7  | 0 | O(C(C=O)C=O)OC(=O)C=CC(=O)C=O                                     |
| MALb_MALb | 8  | 10 | 8  | 0 | O(C(C=O)C(O)C=O)OC(C=O)C(O)C=O                                    |
| MALb_C6a  | 10 | 10 | 5  | 0 | O(C(C=O)C(O)C=O)Oc1ccccc1                                         |
| MALb_NBZa | 8  | 9  | 10 | 1 | O(C(C=O)C(O)C=O)OC1C(=O)OCC1ON(=O)=O                              |
| MALb_BZFU | 8  | 10 | 8  | 0 | O(C(C=O)C(O)C=O)OC1C(O)COC1=O                                     |
| MALb_C3a  | 7  | 8  | 8  | 0 | OC(C=O)C(=O)(OOC(C=O)C(O)C=O)                                     |
| MALb_CATE | 10 | 10 | 6  | 0 | O(C(C=O)C(O)C=O)Oc1ccccc1O                                        |
| MALb_C2a  | 6  | 6  | 7  | 0 | O(C(C=O)C(O)C=O)OC(=O)C=O                                         |
| MALb_C2b  | 6  | 8  | 6  | 0 | O(C(C=O)C(O)C=O)OCC=O                                             |
| MALb_NPHb | 10 | 9  | 7  | 1 | O(C(C=O)C(O)C=O)Oc1ccccc1N(=O)=O                                  |
| MALb_NNC  | 10 | 10 | 14 | 2 | O(C(C=O)C(O)C=O)OC1(O)C(=CC2(OOC1C2ON(=O)=O)N(=O)=O)O             |
| MALb_NCAT | 10 | 11 | 12 | 1 | O(C(C=O)C(O)C=O)OC1(O)C(=CC2(OOC1C2O)N(=O)=O)O                    |
| MALb_NBZb | 10 | 9  | 10 | 1 | O(C(C=O)C(O)C=O)OC1C(=O)C=CC(=O)C1ON(=O)=O                        |
| MALb_PBZ  | 10 | 10 | 8  | 0 | O(C(C=O)C(O)C=O)OC1C(=O)C=CC(=O)C1O                               |
| MALb_MALc | 8  | 8  | 9  | 0 | O(C(C=O)C(O)C=O)OC1C(=O)OC(=O)C1O                                 |
| MALb_NDN  | 10 | 9  | 15 | 3 | O(C(C=O)C(O)C=O)OC1(O)C(=CC2(OOC1C2ON(=O)=O)N(=O)=O)N(=O)=O       |
| MALb_DNP  | 10 | 10 | 13 | 2 | O(C(C=O)C(O)C=O)OC1(O)C(=CC2(OOC1C2O)N(=O)=O)N(=O)=O              |
| MALb_C2c  | 6  | 8  | 7  | 0 | OCC(=O)(OOC(C=O)C(O)C=O)                                          |
| MALb_C5a  | 10 | 10 | 9  | 0 | OC(C=O)C(=O)C=CC(=O)(OOC(C=O)C(O)C=O)                             |
| MALb_C4a  | 9  | 8  | 8  | 0 | O(C(C=O)C(O)C=O)OC(=O)C=CC(=O)C=O                                 |
| C6a_C6a   | 12 | 10 | 2  | 0 | O(c1ccccc1)Oc1ccccc1                                              |
| C6a_NBZa  | 10 | 9  | 7  | 1 | O(c1ccccc1)OC1C(=O)OCC1ON(=O)=O                                   |
| C6a_BZFU  | 10 | 10 | 5  | 0 | O(c1ccccc1)OC1C(O)COC1=O                                          |
| C6a_C3a   | 9  | 8  | 5  | 0 | OC(C=O)C(=O)(Ooc1ccccc1)                                          |
| C6a_CATE  | 12 | 10 | 3  | 0 | O(c1ccccc1)Oc1ccccc1O                                             |
| C6a_C2a   | 8  | 6  | 4  | 0 | O(c1ccccc1)OC(=O)C=O                                              |
| C6a_C2b   | 8  | 8  | 3  | 0 | O(c1ccccc1)OCC=O                                                  |
| C6a_NPHb  | 12 | 9  | 4  | 1 | O(c1ccccc1)Oc1ccccc1N(=O)=O                                       |
| C6a_NNC   | 12 | 10 | 11 | 2 | O(c1ccccc1)OC1(O)C(=CC2(OOC1C2ON(=O)=O)N(=O)=O)O                  |
| C6a_NCAT  | 12 | 11 | 9  | 1 | O(c1ccccc1)OC1(O)C(=CC2(OOC1C2O)N(=O)=O)O                         |
| C6a_NBZb  | 12 | 9  | 7  | 1 | O(c1ccccc1)OC1C(=O)C=CC(=O)C1ON(=O)=O                             |
| C6a_PBZ   | 12 | 10 | 5  | 0 | O(c1ccccc1)OC1C(=O)C=CC(=O)C1O                                    |
| C6a_MALc  | 10 | 8  | 6  | 0 | O(c1ccccc1)OC1C(=O)OC(=O)C1O                                      |
| C6a_NDN   | 12 | 9  | 12 | 3 | O(c1ccccc1)OC1(O)C(=CC2(OOC1C2ON(=O)=O)N(=O)=O)N(=O)=O            |
| C6a_DNP   | 12 | 10 | 10 | 2 | O(c1ccccc1)OC1(O)C(=CC2(OOC1C2O)N(=O)=O)N(=O)=O                   |
| C6a_C2c   | 8  | 8  | 4  | 0 | OCC(=O)(Ooc1ccccc1)                                               |
| C6a_C5a   | 12 | 10 | 6  | 0 | OC(C=O)C(=O)C=CC(=O)(Ooc1ccccc1)                                  |
| C6a_C4a   | 11 | 8  | 5  | 0 | O(c1ccccc1)OC(=O)C=CC(=O)C=O                                      |
| NBZa_NBZa | 8  | 8  | 12 | 2 | O(C1C(=O)OCC1ON(=O)=O)OC1C(=O)OCC1ON(=O)=O                        |
| NBZa_BZFU | 8  | 9  | 10 | 1 | O(C1C(=O)OCC1ON(=O)=O)OC1C(O)COC1=O                               |
| NBZa_C3a  | 7  | 7  | 10 | 1 | OC(C=O)C(=O)(OOC1C(=O)OCC1ON(=O)=O)                               |
| NBZa_CATE | 10 | 9  | 8  | 1 | O(C1C(=O)OCC1ON(=O)=O)Oc1ccccc1O                                  |
| NBZa_C2a  | 6  | 5  | 9  | 1 | O(C1C(=O)OCC1ON(=O)=O)OC(=O)C=O                                   |
| NBZa_C2b  | 6  | 7  | 8  | 1 | O(C1C(=O)OCC1ON(=O)=O)OCC=O                                       |
| NBZa_NPHb | 10 | 8  | 9  | 2 | O(C1C(=O)OCC1ON(=O)=O)Oc1ccccc1N(=O)=O                            |
| NBZa_NNC  | 10 | 9  | 16 | 3 | O(C1C(=O)OCC1ON(=O)=O)OC1(O)C(=CC2(OOC1C2ON(=O)=O)N(=O)=O)O       |
| NBZa_NCAT | 10 | 10 | 14 | 2 | O(C1C(=O)OCC1ON(=O)=O)OC1(O)C(=CC2(OOC1C2O)N(=O)=O)O              |
| NBZa_NBZb | 10 | 8  | 12 | 2 | O(C1C(=O)OCC1ON(=O)=O)OC1C(=O)C=CC(=O)C1ON(=O)=O                  |
| NBZa_PBZ  | 10 | 9  | 10 | 1 | O(C1C(=O)OCC1ON(=O)=O)OC1C(=O)C=CC(=O)C1O                         |
| NBZa_MALc | 8  | 7  | 11 | 1 | O(C1C(=O)OCC1ON(=O)=O)OC1C(=O)OC(=O)C1O                           |
| NBZa_NDN  | 10 | 8  | 17 | 4 | O(C1C(=O)OCC1ON(=O)=O)OC1(O)C(=CC2(OOC1C2ON(=O)=O)N(=O)=O)N(=O)=O |
| NBZa_DNP  | 10 | 9  | 15 | 3 | O(C1C(=O)OCC1ON(=O)=O)OC1(O)C(=CC2(OOC1C2O)N(=O)=O)N(=O)=O        |
| NBZa_C2c  | 6  | 7  | 9  | 1 | OCC(=O)(OOC1C(=O)OCC1ON(=O)=O)                                    |
| NBZa_C5a  | 10 | 9  | 11 | 1 | OC(C=O)C(=O)C=CC(=O)(OOC1C(=O)OCC1ON(=O)=O)                       |
| NBZa_C4a  | 9  | 7  | 10 | 1 | O(C1C(=O)OCC1ON(=O)=O)OC(=O)C=CC(=O)C=O                           |
| BZFU_BZFU | 8  | 10 | 8  | 0 | O(C1C(O)COC1=O)OC1C(O)COC1=O                                      |
| BZFU_C3a  | 7  | 8  | 8  | 0 | OC(C=O)C(=O)(OOC1C(O)COC1=O)                                      |
| BZFU_CATE | 10 | 10 | 6  | 0 | O(C1C(O)COC1=O)Oc1ccccc1O                                         |
| BZFU_C2a  | 6  | 6  | 7  | 0 | O(C1C(O)COC1=O)OC(=O)C=O                                          |
| BZFU_C2b  | 6  | 8  | 6  | 0 | O(C1C(O)COC1=O)OCC=O                                              |
| BZFU_NPHb | 10 | 9  | 7  | 1 | O(C1C(O)COC1=O)Oc1ccccc1N(=O)=O                                   |
| BZFU_NNC  | 10 | 10 | 14 | 2 | O(C1C(O)COC1=O)OC1(O)C(=CC2(OOC1C2ON(=O)=O)N(=O)=O)O              |
| BZFU_NCAT | 10 | 11 | 12 | 1 | O(C1C(O)COC1=O)OC1(O)C(=CC2(OOC1C2O)N(=O)=O)O                     |
| BZFU_NBZb | 10 | 9  | 10 | 1 | O(C1C(O)COC1=O)OC1C(=O)C=CC(=O)C1ON(=O)=O                         |
| BZFU_PBZ  | 10 | 10 | 8  | 0 | O(C1C(O)COC1=O)OC1C(=O)C=CC(=O)C1O                                |
| BZFU_MALc | 8  | 8  | 9  | 0 | O(C1C(O)COC1=O)OC1C(=O)OC(=O)C1O                                  |
| BZFU_NDN  | 10 | 9  | 15 | 3 | O(C1C(O)COC1=O)OC1(O)C(=CC2(OOC1C2ON(=O)=O)N(=O)=O)N(=O)=O        |
| BZFU_DNP  | 10 | 10 | 13 | 2 | O(C1C(O)COC1=O)OC1(O)C(=CC2(OOC1C2O)N(=O)=O)N(=O)=O               |
| BZFU_C2c  | 6  | 8  | 7  | 0 | OCC(=O)(OOC1C(O)COC1=O)                                           |
| BZFU_C5a  | 10 | 10 | 9  | 0 | OC(C=O)C(=O)C=CC(=O)(OOC1C(O)COC1=O)                              |
| BZFU_C4a  | 9  | 8  | 8  | 0 | O(C1C(O)COC1=O)OC(=O)C=CC(=O)C=O                                  |
| C3a_C3a   | 6  | 6  | 8  | 0 | OC(C=O)C(=O)(OOC(C(=O)C(C=O)O))                                   |
| C3a_CATE  | 9  | 8  | 6  | 0 | OC(C=O)C(=O)(Ooc1ccccc1O)                                         |
| C3a_C2a   | 5  | 4  | 7  | 0 | OC(C=O)C(=O)(OOC(=O)C=O)                                          |
| C3a_C2b   | 5  | 6  | 6  | 0 | OC(C=O)C(=O)(OCC=O)                                               |

|           |    |    |    |   |                                                                                    |
|-----------|----|----|----|---|------------------------------------------------------------------------------------|
| C3a_NPHb  | 9  | 7  | 7  | 1 | OC(C=O)C(=O)(OOC1CCCC1N(=O)=O)                                                     |
| C3a_NNC   | 9  | 8  | 14 | 2 | OC(C=O)C(=O)(OOC1(O)C(=CC2(OOC1C2ON(=O)=O)N(=O)=O)O)                               |
| C3a_NCAT  | 9  | 9  | 12 | 1 | OC(C=O)C(=O)(OOC1(O)C(=CC2(OOC1C2O)N(=O)=O)O)                                      |
| C3a_NBZb  | 9  | 7  | 10 | 1 | OC(C=O)C(=O)(OOC1C(=O)C=CC(=O)C1ON(=O)=O)                                          |
| C3a_PBZ   | 9  | 8  | 8  | 0 | OC(C=O)C(=O)(OOC1C(=O)C=CC(=O)C1O)                                                 |
| C3a_MALc  | 7  | 6  | 9  | 0 | OC(C=O)C(=O)(OOC1C(=O)OC(=O)C1O)                                                   |
| C3a_NDN   | 9  | 7  | 15 | 3 | OC(C=O)C(=O)(OOC1(O)C(=CC2(OOC1C2ON(=O)=O)N(=O)=O)N(=O)=O)                         |
| C3a_DNP   | 9  | 8  | 13 | 2 | OC(C=O)C(=O)(OOC1(O)C(=CC2(OOC1C2O)N(=O)=O)N(=O)=O)                                |
| C3a_C2c   | 5  | 6  | 7  | 0 | OC(C=O)C(=O)(OC(C(=O)CO))                                                          |
| C3a_C5a   | 9  | 8  | 9  | 0 | OC(C=O)C(=O)(OC(C(=O)C=CC(=O)C(C=O)O))                                             |
| C3a_C4a   | 8  | 6  | 8  | 0 | OC(C=O)C(=O)(OOC(=O)C=CC(=O)C=O)                                                   |
| CATE_CATE | 12 | 10 | 4  | 0 | O(c1cccc1O)Oc1cccc1O                                                               |
| CATE_C2a  | 8  | 6  | 5  | 0 | O(c1cccc1O)OC(=O)C=O                                                               |
| CATE_C2b  | 8  | 8  | 4  | 0 | O(c1cccc1O)OCC=O                                                                   |
| CATE_NPHb | 12 | 9  | 5  | 1 | O(c1cccc1O)Oc1cccc1N(=O)=O                                                         |
| CATE_NNC  | 12 | 10 | 12 | 2 | O(c1cccc1O)OC1(O)C(=CC2(OOC1C2ON(=O)=O)N(=O)=O)O                                   |
| CATE_NCAT | 12 | 11 | 10 | 1 | O(c1cccc1O)OC1(O)C(=CC2(OOC1C2O)N(=O)=O)O                                          |
| CATE_NBZb | 12 | 9  | 8  | 1 | O(c1cccc1O)OC1C(=O)C=CC(=O)C1ON(=O)=O                                              |
| CATE_PBZ  | 12 | 10 | 6  | 0 | O(c1cccc1O)OC1C(=O)C=CC(=O)C1O                                                     |
| CATE_MALc | 10 | 8  | 7  | 0 | O(c1cccc1O)OC1C(=O)OC(=O)C1O                                                       |
| CATE_NDN  | 12 | 9  | 13 | 3 | O(c1cccc1O)OC1(O)C(=CC2(OOC1C2ON(=O)=O)N(=O)=O)N(=O)=O                             |
| CATE_DNP  | 12 | 10 | 11 | 2 | O(c1cccc1O)OC1(O)C(=CC2(OOC1C2O)N(=O)=O)N(=O)=O                                    |
| CATE_C2c  | 8  | 8  | 5  | 0 | OCC(=O)(OOC1CCCC1O)                                                                |
| CATE_C5a  | 12 | 10 | 7  | 0 | OC(C=O)C(=O)C=CC(=O)(OOC1CCCC1O)                                                   |
| CATE_C4a  | 11 | 8  | 6  | 0 | O(c1cccc1O)OC(=O)C=CC(=O)C=O                                                       |
| C2a_C2a   | 4  | 2  | 6  | 0 | O(C(=O)C=O)OC(=O)C=O                                                               |
| C2a_C2b   | 4  | 4  | 5  | 0 | O(C(=O)C=O)OCC=O                                                                   |
| C2a_NPHb  | 8  | 5  | 6  | 1 | O(C(=O)C=O)Oc1cccc1N(=O)=O                                                         |
| C2a_NNC   | 8  | 6  | 13 | 2 | O(C(=O)C=O)OC1(O)C(=CC2(OOC1C2ON(=O)=O)N(=O)=O)O                                   |
| C2a_NCAT  | 8  | 7  | 11 | 1 | O(C(=O)C=O)OC1(O)C(=CC2(OOC1C2O)N(=O)=O)O                                          |
| C2a_NBZb  | 8  | 5  | 9  | 1 | O(C(=O)C=O)OC1C(=O)C=CC(=O)C1ON(=O)=O                                              |
| C2a_PBZ   | 8  | 6  | 7  | 0 | O(C(=O)C=O)OC1C(=O)C=CC(=O)C1O                                                     |
| C2a_MALc  | 6  | 4  | 8  | 0 | O(C(=O)C=O)OC1C(=O)OC(=O)C1O                                                       |
| C2a_NDN   | 8  | 5  | 14 | 3 | O(C(=O)C=O)OC1(O)C(=CC2(OOC1C2ON(=O)=O)N(=O)=O)N(=O)=O                             |
| C2a_DNP   | 8  | 6  | 12 | 2 | O(C(=O)C=O)OC1(O)C(=CC2(OOC1C2O)N(=O)=O)N(=O)=O                                    |
| C2a_C2c   | 4  | 4  | 6  | 0 | OCC(=O)(OOC(=O)C=O)                                                                |
| C2a_C5a   | 8  | 6  | 8  | 0 | OC(C=O)C(=O)C=CC(=O)(OOC(=O)C=O)                                                   |
| C2a_C4a   | 7  | 4  | 7  | 0 | O(C(=O)C=O)OC(=O)C=CC(=O)C=O                                                       |
| C2b_C2b   | 4  | 6  | 4  | 0 | O(CC=O)OCC=O                                                                       |
| C2b_NPHb  | 8  | 7  | 5  | 1 | O(CC=O)Oc1cccc1N(=O)=O                                                             |
| C2b_NNC   | 8  | 8  | 12 | 2 | O(CC=O)OC1(O)C(=CC2(OOC1C2ON(=O)=O)N(=O)=O)O                                       |
| C2b_NCAT  | 8  | 9  | 10 | 1 | O(CC=O)OC1(O)C(=CC2(OOC1C2O)N(=O)=O)O                                              |
| C2b_NBZb  | 8  | 7  | 8  | 1 | O(CC=O)OC1C(=O)C=CC(=O)C1ON(=O)=O                                                  |
| C2b_PBZ   | 8  | 8  | 6  | 0 | O(CC=O)OC1C(=O)C=CC(=O)C1O                                                         |
| C2b_MALc  | 6  | 6  | 7  | 0 | O(CC=O)OC1C(=O)OC(=O)C1O                                                           |
| C2b_NDN   | 8  | 7  | 13 | 3 | O(CC=O)OC1(O)C(=CC2(OOC1C2ON(=O)=O)N(=O)=O)N(=O)=O                                 |
| C2b_DNP   | 8  | 8  | 11 | 2 | O(CC=O)OC1(O)C(=CC2(OOC1C2O)N(=O)=O)N(=O)=O                                        |
| C2b_C2c   | 4  | 6  | 5  | 0 | OCC(=O)(OOC=O)                                                                     |
| C2b_C5a   | 8  | 8  | 7  | 0 | OC(C=O)C(=O)C=CC(=O)(OOC=O)                                                        |
| C2b_C4a   | 7  | 6  | 6  | 0 | O(CC=O)OC(=O)C=CC(=O)C=O                                                           |
| NPHb_NPHb | 12 | 8  | 6  | 2 | O(c1cccc1N(=O)=O)Oc1cccc1N(=O)=O                                                   |
| NPHb_NNC  | 12 | 9  | 13 | 3 | O(c1cccc1N(=O)=O)OC1(O)C(=CC2(OOC1C2ON(=O)=O)N(=O)=O)O                             |
| NPHb_NCAT | 12 | 10 | 11 | 2 | O(c1cccc1N(=O)=O)OC1(O)C(=CC2(OOC1C2O)N(=O)=O)O                                    |
| NPHb_NBZb | 12 | 8  | 9  | 2 | O(c1cccc1N(=O)=O)OC1C(=O)C=CC(=O)C1ON(=O)=O                                        |
| NPHb_PBZ  | 12 | 9  | 7  | 1 | O(c1cccc1N(=O)=O)OC1C(=O)C=CC(=O)C1O                                               |
| NPHb_MALc | 10 | 7  | 8  | 1 | O(c1cccc1N(=O)=O)OC1C(=O)OC(=O)C1O                                                 |
| NPHb_NDN  | 12 | 8  | 14 | 4 | O(c1cccc1N(=O)=O)OC1(O)C(=CC2(OOC1C2ON(=O)=O)N(=O)=O)N(=O)=O                       |
| NPHb_DNP  | 12 | 9  | 12 | 3 | O(c1cccc1N(=O)=O)OC1(O)C(=CC2(OOC1C2O)N(=O)=O)N(=O)=O                              |
| NPHb_C2c  | 8  | 7  | 6  | 1 | OCC(=O)(OOC1CCCC1N(=O)=O)                                                          |
| NPHb_C5a  | 12 | 9  | 8  | 1 | OC(C=O)C(=O)C=CC(=O)(OOC1CCCC1N(=O)=O)                                             |
| NPHb_C4a  | 11 | 7  | 7  | 1 | O(c1cccc1N(=O)=O)OC(=O)C=CC(=O)C=O                                                 |
| NNC_NNC   | 12 | 10 | 20 | 4 | O(C1(O)C(=CC2(OOC1C2ON(=O)=O)N(=O)=O)O)OC1(O)C(=CC2(OOC1C2ON(=O)=O)N(=O)=O)O       |
| NNC_NCAT  | 12 | 11 | 18 | 3 | O(C1(O)C(=CC2(OOC1C2ON(=O)=O)N(=O)=O)O)OC1(O)C(=CC2(OOC1C2O)N(=O)=O)O              |
| NNC_NBZb  | 12 | 9  | 16 | 3 | O(C1(O)C(=CC2(OOC1C2ON(=O)=O)N(=O)=O)O)OC1C(=O)C=CC(=O)C1ON(=O)=O                  |
| NNC_PBZ   | 12 | 10 | 14 | 2 | O(C1(O)C(=CC2(OOC1C2ON(=O)=O)N(=O)=O)O)OC1C(=O)C=CC(=O)C1O                         |
| NNC_MALc  | 10 | 8  | 15 | 2 | O(C1(O)C(=CC2(OOC1C2ON(=O)=O)N(=O)=O)O)OC1C(=O)OC(=O)C1O                           |
| NNC_NDN   | 12 | 9  | 21 | 5 | O(C1(O)C(=CC2(OOC1C2ON(=O)=O)N(=O)=O)O)OC1(O)C(=CC2(OOC1C2ON(=O)=O)N(=O)=O)N(=O)=O |
| NNC_DNP   | 12 | 10 | 19 | 4 | O(C1(O)C(=CC2(OOC1C2ON(=O)=O)N(=O)=O)O)OC1(O)C(=CC2(OOC1C2O)N(=O)=O)N(=O)=O        |
| NNC_C2c   | 8  | 8  | 13 | 2 | OCC(=O)(OOC1(O)C(=CC2(OOC1C2ON(=O)=O)N(=O)=O)O)                                    |
| NNC_C5a   | 12 | 10 | 15 | 2 | OC(C=O)C(=O)C=CC(=O)(OOC1(O)C(=CC2(OOC1C2ON(=O)=O)N(=O)=O)O)                       |
| NNC_C4a   | 11 | 8  | 14 | 2 | O(C1(O)C(=CC2(OOC1C2ON(=O)=O)N(=O)=O)O)OC(=O)C=CC(=O)C=O                           |
| NCAT_NCAT | 12 | 12 | 16 | 2 | O(C1(O)C(=CC2(OOC1C2O)N(=O)=O)O)OC1(O)C(=CC2(OOC1C2O)N(=O)=O)O                     |
| NCAT_NBZb | 12 | 10 | 14 | 2 | O(C1(O)C(=CC2(OOC1C2O)N(=O)=O)O)OC1C(=O)C=CC(=O)C1ON(=O)=O                         |
| NCAT_PBZ  | 12 | 11 | 12 | 1 | O(C1(O)C(=CC2(OOC1C2O)N(=O)=O)O)OC1C(=O)C=CC(=O)C1O                                |
| NCAT_MALc | 10 | 9  | 13 | 1 | O(C1(O)C(=CC2(OOC1C2O)N(=O)=O)O)OC1C(=O)OC(=O)C1O                                  |

|             |    |    |    |   |                                                                                          |
|-------------|----|----|----|---|------------------------------------------------------------------------------------------|
| NCAT_NDN    | 12 | 10 | 19 | 4 | O(C1(O)C(=CC2(OOC1C2O)N(=O)=O)O)OC1(O)C(=CC2(OOC1C2ON(=O)=O)N(=O)=O)N(=O)=O              |
| NCAT_DNP    | 12 | 11 | 17 | 3 | O(C1(O)C(=CC2(OOC1C2O)N(=O)=O)O)OC1(O)C(=CC2(OOC1C2O)N(=O)=O)N(=O)=O                     |
| NCAT_C2c    | 8  | 9  | 11 | 1 | OCC(=O)(OOC1(O)C(=CC2(OOC1C2O)N(=O)=O)O)                                                 |
| NCAT_C5a    | 12 | 11 | 13 | 1 | OC(C=O)C(=O)C=CC(=O)(OOC1(O)C(=CC2(OOC1C2O)N(=O)=O)O)                                    |
| NCAT_C4a    | 11 | 9  | 12 | 1 | O(C1(O)C(=CC2(OOC1C2O)N(=O)=O)O)OC(=O)C=CC(=O)C=O                                        |
| NBZb_NBZb   | 12 | 8  | 12 | 2 | O(C1C(=O)C=CC(=O)C1ON(=O)=O)OC1C(=O)C=CC(=O)C1ON(=O)=O                                   |
| NBZb_PBZ    | 12 | 9  | 10 | 1 | O(C1C(=O)C=CC(=O)C1ON(=O)=O)OC1C(=O)C=CC(=O)C1O                                          |
| NBZb_MALc   | 10 | 7  | 11 | 1 | O(C1C(=O)C=CC(=O)C1ON(=O)=O)OC1C(=O)OC(=O)C1O                                            |
| NBZb_NDN    | 12 | 8  | 17 | 4 | O(C1C(=O)C=CC(=O)C1ON(=O)=O)OC1(O)C(=CC2(OOC1C2ON(=O)=O)N(=O)=O)N(=O)=O                  |
| NBZb_DNP    | 12 | 9  | 15 | 3 | O(C1C(=O)C=CC(=O)C1ON(=O)=O)OC1(O)C(=CC2(OOC1C2O)N(=O)=O)N(=O)=O                         |
| NBZb_C2c    | 8  | 7  | 9  | 1 | OCC(=O)(OOC1C(=O)C=CC(=O)C1ON(=O)=O)                                                     |
| NBZb_C5a    | 12 | 9  | 11 | 1 | OC(C=O)C(=O)C=CC(=O)(OOC1C(=O)C=CC(=O)C1ON(=O)=O)                                        |
| NBZb_C4a    | 11 | 7  | 10 | 1 | O(C1C(=O)C=CC(=O)C1ON(=O)=O)OC(=O)C=CC(=O)C=O                                            |
| PBZ_PBZ     | 12 | 10 | 8  | 0 | O(C1C(=O)C=CC(=O)C1O)OC1C(=O)C=CC(=O)C1O                                                 |
| PBZ_MALc    | 10 | 8  | 9  | 0 | O(C1C(=O)C=CC(=O)C1O)OC1C(=O)OC(=O)C1O                                                   |
| PBZ_NDN     | 12 | 9  | 15 | 3 | O(C1C(=O)C=CC(=O)C1ON(=O)=O)OC1(O)C(=CC2(OOC1C2ON(=O)=O)N(=O)=O)N(=O)=O                  |
| PBZ_DNP     | 12 | 10 | 13 | 2 | O(C1C(=O)C=CC(=O)C1O)OC1(O)C(=CC2(OOC1C2O)N(=O)=O)N(=O)=O                                |
| PBZ_C2c     | 8  | 8  | 7  | 0 | OCC(=O)(OOC1C(=O)C=CC(=O)C1O)                                                            |
| PBZ_C5a     | 12 | 10 | 9  | 0 | OC(C=O)C(=O)C=CC(=O)(OOC1C(=O)C=CC(=O)C1O)                                               |
| PBZ_C4a     | 11 | 8  | 8  | 0 | O(C1C(=O)C=CC(=O)C1O)OC(=O)C=CC(=O)C=O                                                   |
| MALc_MALc   | 8  | 6  | 10 | 0 | O(C1C(=O)OC(=O)C1O)OC1C(=O)OC(=O)C1O                                                     |
| MALc_NDN    | 10 | 7  | 16 | 3 | O(C1C(=O)OC(=O)C1O)OC1(O)C(=CC2(OOC1C2ON(=O)=O)N(=O)=O)N(=O)=O                           |
| MALc_DNP    | 10 | 8  | 14 | 2 | O(C1C(=O)OC(=O)C1O)OC1(O)C(=CC2(OOC1C2O)N(=O)=O)N(=O)=O                                  |
| MALc_C2c    | 6  | 6  | 8  | 0 | OCC(=O)(OOC1C(=O)OC(=O)C1O)                                                              |
| MALc_C5a    | 10 | 8  | 10 | 0 | OC(C=O)C(=O)C=CC(=O)(OOC1C(=O)OC(=O)C1O)                                                 |
| MALc_C4a    | 9  | 6  | 9  | 0 | O(C1C(=O)OC(=O)C1O)OC(=O)C=CC(=O)C=O                                                     |
| NDN_NDN     | 12 | 8  | 22 | 6 | O(C1(O)C(=CC2(OOC1C2ON(=O)=O)N(=O)=O)N(=O)=O)OC1(O)C(=CC2(OOC1C2ON(=O)=O)N(=O)=O)N(=O)=O |
| NDN_DNP     | 12 | 9  | 20 | 5 | O(C1(O)C(=CC2(OOC1C2ON(=O)=O)N(=O)=O)N(=O)=O)OC1(O)C(=CC2(OOC1C2O)N(=O)=O)N(=O)=O        |
| NDN_C2c     | 8  | 7  | 14 | 3 | OCC(=O)(OOC1(O)C(=CC2(OOC1C2ON(=O)=O)N(=O)=O)N(=O)=O)                                    |
| NDN_C5a     | 12 | 9  | 16 | 3 | OC(C=O)C(=O)C=CC(=O)(OOC1(O)C(=CC2(OOC1C2ON(=O)=O)N(=O)=O)N(=O)=O)                       |
| NDN_C4a     | 11 | 7  | 15 | 3 | O(C1(O)C(=CC2(OOC1C2ON(=O)=O)N(=O)=O)N(=O)=O)OC(=O)C=CC(=O)C=O                           |
| DNP_DNP     | 12 | 10 | 18 | 4 | O(C1(O)C(=CC2(OOC1C2O)N(=O)=O)N(=O)=O)OC1(O)C(=CC2(OOC1C2O)N(=O)=O)N(=O)=O               |
| DNP_C2c     | 8  | 8  | 12 | 2 | OCC(=O)(OOC1(O)C(=CC2(OOC1C2ON(=O)=O)N(=O)=O)N(=O)=O)                                    |
| DNP_C5a     | 12 | 10 | 14 | 2 | OC(C=O)C(=O)C=CC(=O)(OOC1(O)C(=CC2(OOC1C2O)N(=O)=O)N(=O)=O)                              |
| DNP_C4a     | 11 | 8  | 13 | 2 | O(C1(O)C(=CC2(OOC1C2O)N(=O)=O)N(=O)=O)OC(=O)C=CC(=O)C=O                                  |
| C2c_C2c     | 4  | 6  | 6  | 0 | OCC(=O)(OO(C(=O)CO))                                                                     |
| C2c_C5a     | 8  | 8  | 8  | 0 | OCC(=O)(OO(C(=O)C=CC(=O)C(C=O)O))                                                        |
| C2c_C4a     | 7  | 6  | 7  | 0 | OCC(=O)(OO(C(=O)C=CC(=O)C=O))                                                            |
| C5a_C5a     | 12 | 10 | 10 | 0 | OC(C=O)C(=O)C=CC(=O)(OO(C(=O)C=CC(=O)C(C=O)O))                                           |
| C5a_C4a     | 11 | 8  | 9  | 0 | OC(C=O)C(=O)C=CC(=O)(OOC(=O)C=CC(=O)C=O)                                                 |
| C4a_C4a     | 10 | 6  | 8  | 0 | O(C(=O)C=CC(=O)C=O)OC(=O)C=CC(=O)C=O                                                     |
| BZo_O5_OOH  | 6  | 8  | 7  | 0 | O=CC(O)C(O)C1OC1C(OO)=O                                                                  |
| BZo_O7_OOH  | 6  | 8  | 9  | 0 | O=C(OO)C(O)C(O)C1OC1C(OO)=O                                                              |
| BZo_O9_OOH  | 6  | 8  | 11 | 0 | O=C(OO)C(O)C(O)C(=O)C(OO)C(=O)OO                                                         |
| BZeo_O4_OOH | 6  | 8  | 6  | 0 | OOC1C2OC2C3OOC1C3(O)                                                                     |
| BZeo_O6_OOH | 6  | 8  | 8  | 0 | O=C=CC(OO)C(O)C(O)C(=O)OO                                                                |
| BZeo_O8_OOH | 6  | 8  | 10 | 0 | O=C(OO)C(O)C(=O)CC(OO)C(=O)OO                                                            |
| C5e_O4_OOH  | 5  | 8  | 6  | 0 | O=CC(OO)C(O)C(O)C=O                                                                      |
| C5_O5_OOH   | 5  | 8  | 7  | 0 | OOC=CC(O)C(O)C(=O)OO                                                                     |
| C5e_O6_OOH  | 5  | 8  | 8  | 0 | O=CC(OO)C(O)C(O)C(OO)=O                                                                  |
| C5_O7_OOH   | 5  | 8  | 9  | 0 | O=C(OO)C(O)C(O)C(O)C(=O)OO                                                               |
| C5e_O8_OOH  | 5  | 8  | 10 | 0 | O=C(OO)C(OO)C(O)C(O)C(OO)=O                                                              |
| BZo_O5_NO3  | 6  | 7  | 8  | 1 | O=CC(O)C(O)C1OC1C(ON(=O)=O)=O                                                            |
| BZo_O7_NO3  | 6  | 7  | 10 | 1 | O=C(ON(=O)=O)C(O)C(O)C1OC1C(OO)=O                                                        |
| BZo_O9_NO3  | 6  | 7  | 12 | 1 | O=C(OO)C(O)C(O)C(=O)C(ON(=O)=O)C(=O)OO                                                   |
| BZeo_O4_NO3 | 6  | 7  | 7  | 1 | O=N(=O)OC1C2OC2C3OOC1C3(O)                                                               |
| BZeo_O6_NO3 | 6  | 7  | 9  | 1 | O=C=CC(OO)C(O)C(O)C(=O)ON(=O)=O                                                          |
| BZeo_O8_NO3 | 6  | 7  | 11 | 1 | O=C(ON(=O)=O)C(O)C(=O)CC(OO)C(=O)OO                                                      |
| C5e_O4_NO3  | 5  | 7  | 7  | 1 | O=CC(ON(=O)=O)C(O)C(O)C=O                                                                |
| C5_O5_NO3   | 5  | 7  | 8  | 1 | OOC=CC(O)C(O)C(=O)ON(=O)=O                                                               |
| C5e_O6_NO3  | 5  | 7  | 9  | 1 | O=CC(OO)C(O)C(O)C(ON(=O)=O)=O                                                            |
| C5_O7_NO3   | 5  | 7  | 10 | 1 | O=C(ON(=O)=O)C(O)C(O)C(O)C(=O)OO                                                         |
| C5e_O8_NO3  | 5  | 7  | 11 | 1 | O=C(ON(=O)=O)C(OO)C(O)C(O)C(OO)=O                                                        |
| ROCS_O5_O   | 6  | 6  | 6  | 0 | O=CC(=O)C(O)C1OC1C(O)=O                                                                  |
| ROCS_O7_O   | 6  | 6  | 8  | 0 | O=C(O)C(=O)C(O)C1OC1C(OO)=O                                                              |
| ROCS_O9_O   | 6  | 6  | 10 | 0 | O=C(OO)C(O)C(O)C(=O)C(=O)C(=O)OO                                                         |
| ROCS_O4_O   | 6  | 6  | 5  | 0 | O=C1C2OC2C3OOC1C3(O)                                                                     |
| ROCS_O6_O   | 6  | 6  | 7  | 0 | O=C=CC(OO)C(=O)C(O)C(=O)O                                                                |
| ROCS_O8_O   | 6  | 6  | 9  | 0 | O=C(O)C(=O)C(=O)CC(OO)C(=O)OO                                                            |

Table ST7: basic properties of the autoAPRAM species for benzene, including species name, atomic composition and the molecular structure in SMILES format.

**References (SI Tables):**

Cocker, D. R., Flagan, R. C., and Seinfeld, J. H.: State-of-the-Art Chamber Facility for Studying Atmospheric Aerosol Chemistry, *Environ. Sci. Technol.*, 35, 2594–2601, <https://doi.org/10.1021/es0019169>, 2001.
